# Supplementary material for: ERK1/2-dependent gene expression in the bovine ovulating follicle
Source: PubMed Central journal article supplement (PMC6212447; doi:10.1038/s41598-018-34015-4), 2018-11-01
Supplement: 41598_2018_34015_MOESM1_ESM.pdf [file 41598_2018_34015_MOESM1_ESM.pdf]

**Supplementary Information for the following manuscript (SREP-18-24310A):**

**ERK1/2-dependent gene expression in the bovine ovulating follicle**

Yasmin Schuermann<sup>1</sup>, Monique T. Rovani<sup>2</sup>, Bernardo Gasperin<sup>3</sup>, Rogério Ferreira<sup>4</sup>, Juliana, Ferst<sup>2</sup>, Ejimedo Madogwe<sup>1</sup>, Paulo B. Gonçalves<sup>2</sup>, Vilceu Bordignon<sup>1</sup>, and Raj Duggavathi<sup>1\*</sup>

<sup>1</sup>Department of Animal Science, McGill University, Sainte-Anne-de-Bellevue, QC H9X 3V9, Canada

<sup>2</sup>Laboratory of Biotechnology and Animal Reproduction, BioRep, Veterinary Hospital, Federal University of Santa Maria, Santa Maria, 97105-900, Brazil,

<sup>3</sup>Laboratory of Animal Reproduction-ReproPEL, Federal University of Pelotas, 96010-610, Capão do Leão, Brazil,

<sup>4</sup>Department of Animal Science, Santa Catarina State University, Santa Catarina, 88040-900, Brazil

**\*Corresponding author:**

Raj Duggavathi,

[raj.duggavathi@mcgill.ca](mailto:raj.duggavathi@mcgill.ca),

McGill University, Animal Science, 21111, Lakeshore road, Ste-Anne-de-Bellevue, QC, CAN H9X3V9

Tel: 514-398-7793

**Supplementary Figure 1: Quality assessment of RNA-seq on bovine granulosa cells.** A. Bioanalysis report revealing peak of a representative sample. B. Per tile sequence quality and per base sequence quality using the FastQC software of a representative sample. C. Principle component analysis of the treatment groups following alignment.

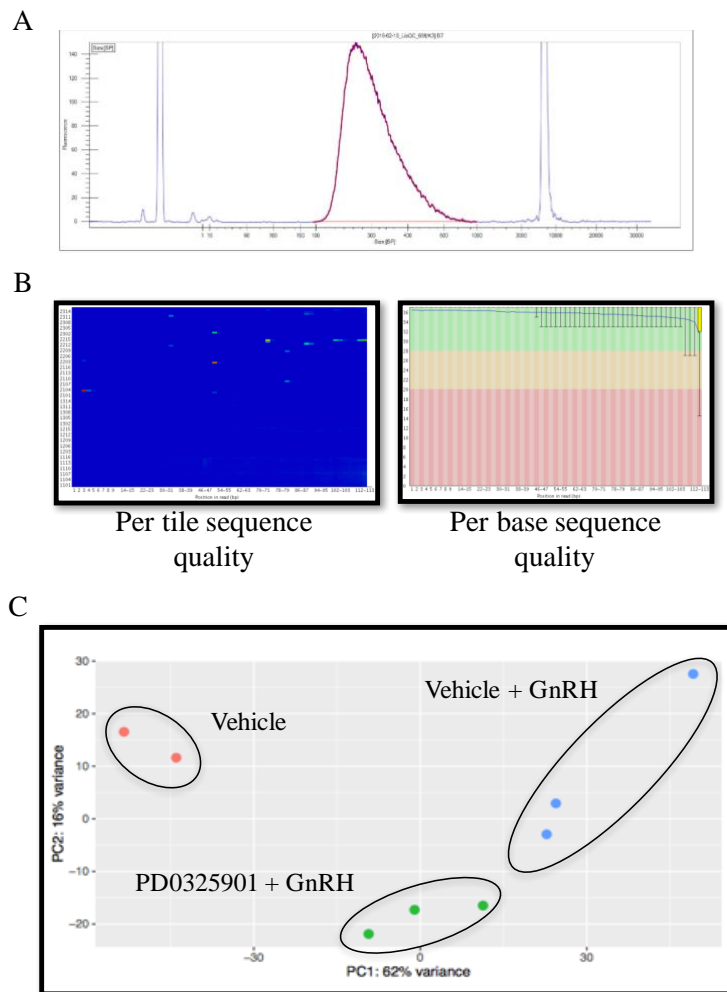

**Supplementary Table 1:** RNA-seq quality and alignment assessment of bovine granulosa cells

| RNA-Seq Quality and Alignment        |            |            |              |
|--------------------------------------|------------|------------|--------------|
| Groups                               | 0h Vehicle | 6h Vehicle | 6h PD0325901 |
| # of Samples                         | 2          | 3          | 3            |
| RNA Integrated Number (Bioanalysis)  | >9.2       | >9.1       | >8.5         |
| 260/280 (Nanodrop Quantification)    | 1.8        | 2.0-2.1    | 2.0-2.1      |
| Avg. # of Raw Reads                  | 31 580 928 | 34 823 800 | 32 781 670   |
| Avg. # of Cleaned Reads/Sample/Group | 23 577 628 | 26 879 332 | 25 478 223   |
| Avg. Alignment/Group                 | 87.35%     | 87.10%     | 86.93%       |

**Supplementary Table 2:** List of 2121 LH-regulated DEGs

| ENSEMBL ID          | <b>Vehicle + GnRH vs Vehicle</b> |                |        |         |          |          |
|---------------------|----------------------------------|----------------|--------|---------|----------|----------|
|                     | baseMean                         | log2FoldChange | lfcSE  | stat    | pvalue   | padj     |
| ENSBTAG00000001321  | 8261.7540                        | 12.0968        | 0.7821 | 15.4678 | 5.73E-54 | 7.72E-51 |
| ENSBTAG00000001785  | 3696.4557                        | 11.1564        | 0.7803 | 14.2968 | 2.29E-46 | 1.93E-43 |
| ENSBTAG00000002135  | 2593.0253                        | 10.9227        | 0.8784 | 12.4344 | 1.70E-35 | 6.37E-33 |
| ENSBTAG000000047904 | 1431.0922                        | 10.5501        | 0.8595 | 12.2752 | 1.23E-34 | 4.37E-32 |
| ENSBTAG000000019716 | 2339.4418                        | 10.4515        | 0.8099 | 12.9050 | 4.22E-38 | 1.72E-35 |
| ENSBTAG000000031814 | 5290.3366                        | 10.3945        | 0.7666 | 13.5585 | 7.05E-42 | 3.66E-39 |
| ENSBTAG000000019665 | 13716.7991                       | 10.2751        | 0.7304 | 14.0677 | 6.00E-45 | 4.49E-42 |
| ENSBTAG00000000828  | 9861.1147                        | 9.9304         | 0.6556 | 15.1472 | 7.91E-52 | 8.88E-49 |
| ENSBTAG000000025257 | 935.9293                         | 9.7840         | 0.9025 | 10.8413 | 2.19E-27 | 5.19E-25 |
| ENSBTAG000000012638 | 2752.3662                        | 9.7115         | 0.8633 | 11.2487 | 2.35E-29 | 5.98E-27 |
| ENSBTAG000000026753 | 910.5394                         | 9.5577         | 0.9241 | 10.3422 | 4.54E-25 | 9.14E-23 |
| ENSBTAG000000013334 | 1444.2931                        | 9.3142         | 0.8107 | 11.4891 | 1.50E-30 | 4.12E-28 |
| ENSBTAG000000037558 | 1112.0383                        | 8.7569         | 0.9449 | 9.2675  | 1.91E-20 | 2.31E-18 |
| ENSBTAG000000015061 | 439.2316                         | 8.7541         | 0.9447 | 9.2669  | 1.92E-20 | 2.31E-18 |
| ENSBTAG000000019123 | 2648.8416                        | 8.7258         | 0.7078 | 12.3279 | 6.41E-35 | 2.34E-32 |
| ENSBTAG000000012640 | 1103.8561                        | 8.6338         | 0.8867 | 9.7365  | 2.11E-22 | 3.46E-20 |
| ENSBTAG000000020713 | 587.4162                         | 8.6275         | 0.7312 | 11.7997 | 3.92E-32 | 1.17E-29 |
| ENSBTAG000000015592 | 818.7520                         | 8.6058         | 0.9271 | 9.2821  | 1.66E-20 | 2.07E-18 |
| ENSBTAG000000038042 | 431.1692                         | 8.5962         | 0.9602 | 8.9524  | 3.48E-19 | 3.61E-17 |
| ENSBTAG000000015865 | 495.4450                         | 8.3334         | 0.8907 | 9.3565  | 8.24E-21 | 1.13E-18 |
| ENSBTAG000000006505 | 1588.9178                        | 8.2961         | 0.8419 | 9.8543  | 6.57E-23 | 1.17E-20 |
| ENSBTAG000000007901 | 463.4886                         | 8.2339         | 0.8847 | 9.3072  | 1.31E-20 | 1.67E-18 |
| ENSBTAG000000034918 | 294.4042                         | 8.0883         | 0.9822 | 8.2350  | 1.80E-16 | 1.33E-14 |
| ENSBTAG000000027513 | 577.1408                         | 8.0270         | 0.9594 | 8.3669  | 5.92E-17 | 4.78E-15 |
| ENSBTAG000000019800 | 261.7667                         | 7.9654         | 0.8174 | 9.7448  | 1.94E-22 | 3.23E-20 |
| ENSBTAG000000016771 | 5946.4817                        | 7.9561         | 0.5101 | 15.5962 | 7.72E-55 | 1.30E-51 |
| ENSBTAG000000006354 | 348.1341                         | 7.9526         | 1.0083 | 7.8874  | 3.09E-15 | 2.00E-13 |
| ENSBTAG000000039046 | 305.4257                         | 7.8987         | 1.0044 | 7.8639  | 3.72E-15 | 2.39E-13 |
| ENSBTAG000000014555 | 167.1680                         | 7.8684         | 0.9540 | 8.2476  | 1.62E-16 | 1.22E-14 |
| ENSBTAG000000027246 | 665.5860                         | 7.7821         | 0.8559 | 9.0920  | 9.72E-20 | 1.07E-17 |
| ENSBTAG000000004714 | 321.8837                         | 7.7601         | 1.0210 | 7.6008  | 2.94E-14 | 1.62E-12 |
| ENSBTAG000000020580 | 433.3525                         | 7.7515         | 0.9600 | 8.0744  | 6.78E-16 | 4.64E-14 |
| ENSBTAG000000007052 | 143.5162                         | 7.7433         | 0.9536 | 8.1200  | 4.66E-16 | 3.29E-14 |
| ENSBTAG000000023198 | 199.8824                         | 7.7203         | 0.9896 | 7.8017  | 6.11E-15 | 3.71E-13 |
| ENSBTAG000000048135 | 262.4241                         | 7.7040         | 1.0128 | 7.6067  | 2.81E-14 | 1.55E-12 |
| ENSBTAG000000013451 | 305.3331                         | 7.6876         | 0.7630 | 10.0754 | 7.09E-24 | 1.37E-21 |
| ENSBTAG000000022396 | 499.6435                         | 7.6558         | 0.9196 | 8.3253  | 8.41E-17 | 6.52E-15 |
| ENSBTAG000000018424 | 233.9842                         | 7.6475         | 0.8670 | 8.8205  | 1.14E-18 | 1.09E-16 |
| ENSBTAG000000003326 | 649.3799                         | 7.5548         | 0.8589 | 8.7963  | 1.41E-18 | 1.34E-16 |

|                    |            |        |        |         |          |          |
|--------------------|------------|--------|--------|---------|----------|----------|
| ENSBTAG00000002623 | 1362.8380  | 7.5297 | 0.7740 | 9.7279  | 2.29E-22 | 3.72E-20 |
| ENSBTAG00000013210 | 22410.2649 | 7.4578 | 0.4618 | 16.1478 | 1.18E-58 | 2.27E-55 |
| ENSBTAG00000021717 | 295.7356   | 7.4516 | 0.6796 | 10.9648 | 5.64E-28 | 1.36E-25 |
| ENSBTAG00000013798 | 333.5431   | 7.4216 | 0.7436 | 9.9805  | 1.86E-23 | 3.38E-21 |
| ENSBTAG00000025471 | 247.9527   | 7.4121 | 0.9136 | 8.1130  | 4.94E-16 | 3.45E-14 |
| ENSBTAG00000019712 | 255.6339   | 7.3723 | 0.8099 | 9.1025  | 8.83E-20 | 9.84E-18 |
| ENSBTAG00000018125 | 241.1259   | 7.3459 | 0.7872 | 9.3318  | 1.04E-20 | 1.39E-18 |
| ENSBTAG00000007392 | 364.7516   | 7.3231 | 0.8064 | 9.0818  | 1.07E-19 | 1.17E-17 |
| ENSBTAG00000031160 | 772.0731   | 7.3212 | 0.8013 | 9.1366  | 6.44E-20 | 7.30E-18 |
| ENSBTAG00000004716 | 153.6408   | 7.3018 | 1.0141 | 7.1999  | 6.03E-13 | 2.82E-11 |
| ENSBTAG00000006949 | 234.1523   | 7.2971 | 0.9234 | 7.9027  | 2.73E-15 | 1.80E-13 |
| ENSBTAG00000000507 | 13486.2815 | 7.2711 | 0.4854 | 14.9808 | 9.80E-51 | 1.02E-47 |
| ENSBTAG00000002340 | 155.9542   | 7.2697 | 1.0188 | 7.1353  | 9.66E-13 | 4.37E-11 |
| ENSBTAG00000011515 | 313.3737   | 7.2380 | 0.7774 | 9.3102  | 1.28E-20 | 1.64E-18 |
| ENSBTAG00000046158 | 894.0882   | 7.2365 | 0.6577 | 11.0028 | 3.71E-28 | 9.09E-26 |
| ENSBTAG00000005965 | 886.4357   | 7.2350 | 0.6164 | 11.7374 | 8.20E-32 | 2.40E-29 |
| ENSBTAG00000004261 | 170.2148   | 7.2240 | 1.0302 | 7.0124  | 2.34E-12 | 9.96E-11 |
| ENSBTAG00000008545 | 1855.1721  | 7.2092 | 0.5627 | 12.8114 | 1.42E-37 | 5.61E-35 |
| ENSBTAG00000001273 | 337.2373   | 7.1719 | 0.8459 | 8.4785  | 2.28E-17 | 1.90E-15 |
| ENSBTAG00000021714 | 3092.7993  | 7.0675 | 0.3802 | 18.5892 | 3.93E-77 | 1.76E-73 |
| ENSBTAG00000020602 | 289.3507   | 7.0652 | 0.8002 | 8.8291  | 1.06E-18 | 1.02E-16 |
| ENSBTAG00000001414 | 225.7132   | 7.0284 | 0.7256 | 9.6864  | 3.45E-22 | 5.53E-20 |
| ENSBTAG00000047700 | 169.1094   | 7.0046 | 0.9155 | 7.6511  | 1.99E-14 | 1.12E-12 |
| ENSBTAG00000012894 | 291.7767   | 6.9739 | 0.8535 | 8.1706  | 3.07E-16 | 2.20E-14 |
| ENSBTAG00000001864 | 996.0537   | 6.9088 | 0.5068 | 13.6308 | 2.63E-42 | 1.48E-39 |
| ENSBTAG00000007191 | 279.2906   | 6.9002 | 0.7340 | 9.4004  | 5.43E-21 | 7.79E-19 |
| ENSBTAG00000048049 | 308.4976   | 6.8803 | 0.9563 | 7.1947  | 6.26E-13 | 2.91E-11 |
| ENSBTAG00000001198 | 98.1866    | 6.8707 | 1.0257 | 6.6987  | 2.10E-11 | 7.86E-10 |
| ENSBTAG00000000671 | 686.0784   | 6.8491 | 0.8780 | 7.8008  | 6.15E-15 | 3.72E-13 |
| ENSBTAG00000047379 | 104.1963   | 6.8126 | 1.0372 | 6.5682  | 5.09E-11 | 1.79E-09 |
| ENSBTAG00000014368 | 168.5765   | 6.7992 | 0.9656 | 7.0413  | 1.91E-12 | 8.29E-11 |
| ENSBTAG00000039037 | 148.5453   | 6.7946 | 1.0631 | 6.3912  | 1.65E-10 | 5.34E-09 |
| ENSBTAG00000021326 | 198.5533   | 6.7724 | 1.0797 | 6.2724  | 3.56E-10 | 1.08E-08 |
| ENSBTAG00000046257 | 379.3798   | 6.7459 | 0.8114 | 8.3138  | 9.27E-17 | 7.14E-15 |
| ENSBTAG00000006343 | 95.3510    | 6.7426 | 1.0380 | 6.4956  | 8.27E-11 | 2.79E-09 |
| ENSBTAG00000009768 | 428.0743   | 6.7269 | 0.6021 | 11.1717 | 5.61E-29 | 1.40E-26 |
| ENSBTAG00000016424 | 145.9206   | 6.7050 | 0.9567 | 7.0088  | 2.40E-12 | 1.02E-10 |
| ENSBTAG00000018223 | 112.6090   | 6.7027 | 0.9003 | 7.4450  | 9.69E-14 | 5.02E-12 |
| ENSBTAG00000011982 | 174.5282   | 6.7023 | 0.8733 | 7.6744  | 1.66E-14 | 9.41E-13 |
| ENSBTAG00000015707 | 76.3656    | 6.6953 | 1.0245 | 6.5355  | 6.34E-11 | 2.18E-09 |
| ENSBTAG00000002937 | 117.0325   | 6.6845 | 1.0590 | 6.3118  | 2.76E-10 | 8.65E-09 |
| ENSBTAG00000025250 | 553.0634   | 6.6539 | 0.7125 | 9.3386  | 9.76E-21 | 1.32E-18 |
| ENSBTAG00000000735 | 476.8205   | 6.6044 | 0.7824 | 8.4407  | 3.16E-17 | 2.59E-15 |

|                    |           |        |        |         |          |          |
|--------------------|-----------|--------|--------|---------|----------|----------|
| ENSBTAG00000046266 | 105.2631  | 6.6026 | 1.0603 | 6.2271  | 4.75E-10 | 1.40E-08 |
| ENSBTAG00000047268 | 78.3540   | 6.6000 | 1.0383 | 6.3566  | 2.06E-10 | 6.59E-09 |
| ENSBTAG00000030940 | 315.7470  | 6.5905 | 0.8579 | 7.6823  | 1.56E-14 | 8.97E-13 |
| ENSBTAG00000019892 | 70.4859   | 6.5880 | 1.0303 | 6.3943  | 1.61E-10 | 5.25E-09 |
| ENSBTAG00000017116 | 1318.0075 | 6.5871 | 0.7642 | 8.6200  | 6.70E-18 | 5.98E-16 |
| ENSBTAG00000014402 | 476.5076  | 6.5661 | 0.6691 | 9.8126  | 9.94E-23 | 1.70E-20 |
| ENSBTAG00000010464 | 92.2591   | 6.5621 | 0.8718 | 7.5267  | 5.20E-14 | 2.80E-12 |
| ENSBTAG00000002929 | 106.0193  | 6.5587 | 1.0652 | 6.1572  | 7.41E-10 | 2.10E-08 |
| ENSBTAG00000037800 | 96.8877   | 6.4918 | 1.0661 | 6.0893  | 1.13E-09 | 3.11E-08 |
| ENSBTAG00000038548 | 56.1929   | 6.4374 | 1.0281 | 6.2612  | 3.82E-10 | 1.15E-08 |
| ENSBTAG00000021492 | 85.2751   | 6.4059 | 0.8989 | 7.1261  | 1.03E-12 | 4.64E-11 |
| ENSBTAG00000006566 | 85.5741   | 6.3878 | 1.0685 | 5.9782  | 2.26E-09 | 5.86E-08 |
| ENSBTAG00000018993 | 272.6032  | 6.3680 | 0.8370 | 7.6078  | 2.79E-14 | 1.55E-12 |
| ENSBTAG00000013227 | 317.5898  | 6.3665 | 0.7110 | 8.9543  | 3.42E-19 | 3.60E-17 |
| ENSBTAG00000002505 | 49.8690   | 6.3564 | 1.0270 | 6.1890  | 6.05E-10 | 1.74E-08 |
| ENSBTAG00000005990 | 456.3003  | 6.3559 | 0.6602 | 9.6269  | 6.15E-22 | 9.54E-20 |
| ENSBTAG00000005892 | 145.1695  | 6.3447 | 1.0164 | 6.2422  | 4.31E-10 | 1.28E-08 |
| ENSBTAG00000020034 | 739.0268  | 6.3440 | 0.6159 | 10.2995 | 7.08E-25 | 1.40E-22 |
| ENSBTAG00000016163 | 66.1293   | 6.3396 | 1.0548 | 6.0103  | 1.85E-09 | 4.93E-08 |
| ENSBTAG00000002908 | 60.2767   | 6.3318 | 1.0480 | 6.0416  | 1.53E-09 | 4.11E-08 |
| ENSBTAG00000007530 | 74.5105   | 6.2911 | 0.8900 | 7.0691  | 1.56E-12 | 6.87E-11 |
| ENSBTAG00000003305 | 298.7140  | 6.2807 | 0.8473 | 7.4124  | 1.24E-13 | 6.33E-12 |
| ENSBTAG00000006130 | 316.0747  | 6.2784 | 0.6496 | 9.6652  | 4.24E-22 | 6.72E-20 |
| ENSBTAG00000015834 | 679.3553  | 6.2683 | 0.3841 | 16.3198 | 7.13E-60 | 1.60E-56 |
| ENSBTAG00000018430 | 141.8378  | 6.2639 | 0.9262 | 6.7626  | 1.36E-11 | 5.25E-10 |
| ENSBTAG00000006939 | 156.2200  | 6.2597 | 0.9376 | 6.6766  | 2.45E-11 | 9.06E-10 |
| ENSBTAG00000018280 | 60.1686   | 6.2571 | 1.0568 | 5.9208  | 3.20E-09 | 8.09E-08 |
| ENSBTAG00000000715 | 111.0114  | 6.2339 | 0.8437 | 7.3891  | 1.48E-13 | 7.49E-12 |
| ENSBTAG00000017593 | 141.2319  | 6.2182 | 0.8034 | 7.7396  | 9.98E-15 | 5.85E-13 |
| ENSBTAG00000016276 | 65.7804   | 6.2067 | 1.0694 | 5.8040  | 6.47E-09 | 1.53E-07 |
| ENSBTAG00000015727 | 75.5614   | 6.1850 | 1.0812 | 5.7204  | 1.06E-08 | 2.43E-07 |
| ENSBTAG00000015419 | 72.4418   | 6.1841 | 0.8991 | 6.8784  | 6.05E-12 | 2.47E-10 |
| ENSBTAG00000025642 | 153.0379  | 6.1795 | 0.7028 | 8.7923  | 1.47E-18 | 1.38E-16 |
| ENSBTAG00000004894 | 71.3999   | 6.1722 | 1.0788 | 5.7212  | 1.06E-08 | 2.42E-07 |
| ENSBTAG00000011437 | 3137.7817 | 6.1668 | 0.5334 | 11.5605 | 6.54E-31 | 1.84E-28 |
| ENSBTAG00000005628 | 262.1524  | 6.1583 | 0.7888 | 7.8075  | 5.83E-15 | 3.57E-13 |
| ENSBTAG00000018165 | 423.7567  | 6.1518 | 0.7848 | 7.8386  | 4.55E-15 | 2.86E-13 |
| ENSBTAG00000019432 | 57.6398   | 6.1492 | 1.0660 | 5.7687  | 7.99E-09 | 1.87E-07 |
| ENSBTAG00000026963 | 89.6813   | 6.1490 | 0.9549 | 6.4394  | 1.20E-10 | 3.96E-09 |
| ENSBTAG00000038154 | 51.8022   | 6.1242 | 1.0603 | 5.7758  | 7.66E-09 | 1.80E-07 |
| ENSBTAG00000034609 | 64.9182   | 6.1149 | 1.0785 | 5.6699  | 1.43E-08 | 3.18E-07 |
| ENSBTAG00000006453 | 56.2825   | 6.1145 | 1.0681 | 5.7246  | 1.04E-08 | 2.38E-07 |
| ENSBTAG00000038437 | 75.2286   | 6.1053 | 0.9395 | 6.4987  | 8.10E-11 | 2.75E-09 |

|                    |           |        |        |         |          |          |
|--------------------|-----------|--------|--------|---------|----------|----------|
| ENSBTAG00000007758 | 2211.4763 | 6.0724 | 0.3602 | 16.8576 | 9.23E-64 | 2.49E-60 |
| ENSBTAG00000020892 | 114.9622  | 6.0688 | 1.0120 | 5.9969  | 2.01E-09 | 5.28E-08 |
| ENSBTAG00000018016 | 78.3796   | 6.0642 | 0.9585 | 6.3271  | 2.50E-10 | 7.89E-09 |
| ENSBTAG00000006031 | 3166.5410 | 6.0634 | 0.4401 | 13.7764 | 3.53E-43 | 2.16E-40 |
| ENSBTAG00000021958 | 50.4950   | 6.0608 | 1.0658 | 5.6865  | 1.30E-08 | 2.90E-07 |
| ENSBTAG00000009064 | 359.4482  | 6.0565 | 0.7780 | 7.7845  | 7.00E-15 | 4.18E-13 |
| ENSBTAG00000011238 | 401.3928  | 6.0386 | 0.7392 | 8.1693  | 3.10E-16 | 2.21E-14 |
| ENSBTAG00000001186 | 146.0238  | 6.0305 | 1.0482 | 5.7532  | 8.75E-09 | 2.05E-07 |
| ENSBTAG00000013730 | 81.9317   | 6.0302 | 0.9603 | 6.2794  | 3.40E-10 | 1.04E-08 |
| ENSBTAG00000009850 | 89.2967   | 6.0293 | 0.9771 | 6.1707  | 6.80E-10 | 1.93E-08 |
| ENSBTAG00000015562 | 96.3725   | 6.0284 | 0.8559 | 7.0432  | 1.88E-12 | 8.20E-11 |
| ENSBTAG00000003255 | 70.2349   | 6.0267 | 0.9276 | 6.4971  | 8.19E-11 | 2.77E-09 |
| ENSBTAG00000014113 | 82.9052   | 6.0174 | 0.9800 | 6.1401  | 8.25E-10 | 2.30E-08 |
| ENSBTAG00000023283 | 112.1392  | 6.0171 | 0.9084 | 6.6239  | 3.50E-11 | 1.27E-09 |
| ENSBTAG00000010411 | 85.0800   | 6.0109 | 0.9712 | 6.1888  | 6.06E-10 | 1.74E-08 |
| ENSBTAG00000046768 | 53.1157   | 6.0101 | 1.0755 | 5.5880  | 2.30E-08 | 4.90E-07 |
| ENSBTAG00000000283 | 481.0707  | 6.0077 | 0.5616 | 10.6982 | 1.04E-26 | 2.37E-24 |
| ENSBTAG00000031397 | 404.1610  | 6.0031 | 0.8209 | 7.3130  | 2.61E-13 | 1.28E-11 |
| ENSBTAG00000017875 | 331.8958  | 5.9859 | 0.8137 | 7.3562  | 1.89E-13 | 9.37E-12 |
| ENSBTAG00000039119 | 45.0790   | 5.9758 | 1.0667 | 5.6020  | 2.12E-08 | 4.58E-07 |
| ENSBTAG00000007881 | 607.7495  | 5.9727 | 0.8089 | 7.3840  | 1.54E-13 | 7.76E-12 |
| ENSBTAG00000001219 | 240.5677  | 5.9696 | 0.8913 | 6.6977  | 2.12E-11 | 7.89E-10 |
| ENSBTAG00000002341 | 288.5819  | 5.9646 | 0.9462 | 6.3037  | 2.91E-10 | 9.05E-09 |
| ENSBTAG00000047727 | 108.2909  | 5.9399 | 0.7836 | 7.5803  | 3.45E-14 | 1.87E-12 |
| ENSBTAG00000007828 | 207.7206  | 5.9378 | 0.7962 | 7.4579  | 8.79E-14 | 4.61E-12 |
| ENSBTAG00000019519 | 103.4989  | 5.9362 | 0.7612 | 7.7987  | 6.26E-15 | 3.77E-13 |
| ENSBTAG00000014761 | 2833.4555 | 5.9152 | 0.7775 | 7.6075  | 2.79E-14 | 1.55E-12 |
| ENSBTAG00000017722 | 121.9211  | 5.9106 | 0.8493 | 6.9595  | 3.41E-12 | 1.43E-10 |
| ENSBTAG00000004547 | 460.9535  | 5.9047 | 0.8207 | 7.1947  | 6.26E-13 | 2.91E-11 |
| ENSBTAG00000023179 | 523.8677  | 5.9045 | 0.6573 | 8.9828  | 2.64E-19 | 2.82E-17 |
| ENSBTAG00000010273 | 4368.7379 | 5.9004 | 0.7580 | 7.7844  | 7.00E-15 | 4.18E-13 |
| ENSBTAG00000000431 | 115.6526  | 5.8634 | 0.6804 | 8.6180  | 6.81E-18 | 6.04E-16 |
| ENSBTAG00000010448 | 35.6269   | 5.8583 | 1.0609 | 5.5218  | 3.36E-08 | 6.92E-07 |
| ENSBTAG00000047448 | 185.6885  | 5.8566 | 0.8406 | 6.9670  | 3.24E-12 | 1.36E-10 |
| ENSBTAG00000019975 | 55.6321   | 5.8380 | 0.9259 | 6.3053  | 2.88E-10 | 8.98E-09 |
| ENSBTAG00000002923 | 234.7841  | 5.8241 | 0.9725 | 5.9885  | 2.12E-09 | 5.52E-08 |
| ENSBTAG00000014016 | 40.7747   | 5.8150 | 1.0780 | 5.3944  | 6.88E-08 | 1.36E-06 |
| ENSBTAG00000001029 | 124.8860  | 5.8073 | 0.9974 | 5.8226  | 5.79E-09 | 1.39E-07 |
| ENSBTAG00000010023 | 156.9688  | 5.7989 | 0.9364 | 6.1926  | 5.92E-10 | 1.71E-08 |
| ENSBTAG00000039509 | 96.1418   | 5.7981 | 0.7575 | 7.6540  | 1.95E-14 | 1.10E-12 |
| ENSBTAG00000000653 | 146.7681  | 5.7742 | 0.8812 | 6.5529  | 5.64E-11 | 1.95E-09 |
| ENSBTAG00000018367 | 42.3327   | 5.7569 | 1.0877 | 5.2930  | 1.20E-07 | 2.30E-06 |
| ENSBTAG00000006582 | 342.6265  | 5.7486 | 0.8070 | 7.1238  | 1.05E-12 | 4.70E-11 |

|                     |            |        |        |         |          |          |
|---------------------|------------|--------|--------|---------|----------|----------|
| ENSBTAG00000006452  | 124.8997   | 5.7443 | 0.7911 | 7.2615  | 3.83E-13 | 1.84E-11 |
| ENSBTAG00000027204  | 187.9170   | 5.7430 | 0.8482 | 6.7706  | 1.28E-11 | 4.98E-10 |
| ENSBTAG00000014439  | 59.8535    | 5.7330 | 1.1121 | 5.1552  | 2.53E-07 | 4.54E-06 |
| ENSBTAG00000006240  | 893.8537   | 5.7270 | 0.5765 | 9.9340  | 2.96E-23 | 5.33E-21 |
| ENSBTAG00000025434  | 17516.0994 | 5.7226 | 0.4036 | 14.1787 | 1.24E-45 | 9.84E-43 |
| ENSBTAG00000001301  | 65.9242    | 5.7197 | 0.9945 | 5.7516  | 8.84E-09 | 2.06E-07 |
| ENSBTAG00000005413  | 369.4671   | 5.7197 | 0.8321 | 6.8735  | 6.26E-12 | 2.54E-10 |
| ENSBTAG00000016388  | 516.6192   | 5.7195 | 0.7272 | 7.8656  | 3.67E-15 | 2.37E-13 |
| ENSBTAG00000046409  | 61.2862    | 5.7135 | 0.9803 | 5.8283  | 5.60E-09 | 1.34E-07 |
| ENSBTAG00000023377  | 731.0709   | 5.7123 | 0.3670 | 15.5655 | 1.25E-54 | 1.87E-51 |
| ENSBTAG00000006466  | 654.3450   | 5.7105 | 0.7227 | 7.9015  | 2.76E-15 | 1.80E-13 |
| ENSBTAG00000002259  | 41.4570    | 5.7068 | 1.0919 | 5.2266  | 1.73E-07 | 3.21E-06 |
| ENSBTAG00000025405  | 54.9222    | 5.6817 | 0.9620 | 5.9059  | 3.51E-09 | 8.74E-08 |
| ENSBTAG00000001882  | 36.0448    | 5.6775 | 1.0847 | 5.2342  | 1.66E-07 | 3.09E-06 |
| ENSBTAG00000008479  | 40.5624    | 5.6740 | 1.0940 | 5.1864  | 2.14E-07 | 3.88E-06 |
| ENSBTAG00000006780  | 74.1900    | 5.6700 | 1.0256 | 5.5284  | 3.23E-08 | 6.71E-07 |
| ENSBTAG00000004269  | 941.3128   | 5.6656 | 0.8256 | 6.8623  | 6.78E-12 | 2.72E-10 |
| ENSBTAG00000012829  | 62.9288    | 5.6570 | 0.9979 | 5.6687  | 1.44E-08 | 3.19E-07 |
| ENSBTAG00000006552  | 99.8226    | 5.6552 | 0.8550 | 6.6144  | 3.73E-11 | 1.34E-09 |
| ENSBTAG000000033748 | 49.4849    | 5.6543 | 1.1091 | 5.0981  | 3.43E-07 | 5.90E-06 |
| ENSBTAG00000016275  | 1872.9740  | 5.6373 | 0.4018 | 14.0310 | 1.01E-44 | 7.14E-42 |
| ENSBTAG00000020747  | 355.9417   | 5.6261 | 0.5936 | 9.4776  | 2.60E-21 | 3.86E-19 |
| ENSBTAG00000015844  | 120.9365   | 5.6221 | 1.0924 | 5.1468  | 2.65E-07 | 4.71E-06 |
| ENSBTAG00000008497  | 52.2648    | 5.6190 | 1.1157 | 5.0363  | 4.75E-07 | 7.85E-06 |
| ENSBTAG00000002006  | 14198.4707 | 5.6149 | 0.8350 | 6.7246  | 1.76E-11 | 6.65E-10 |
| ENSBTAG00000002951  | 52.2307    | 5.6021 | 1.1173 | 5.0140  | 5.33E-07 | 8.73E-06 |
| ENSBTAG00000040331  | 56.8860    | 5.5908 | 0.9750 | 5.7342  | 9.80E-09 | 2.26E-07 |
| ENSBTAG00000000095  | 129.1531   | 5.5902 | 0.8921 | 6.2661  | 3.70E-10 | 1.12E-08 |
| ENSBTAG00000033304  | 251.8733   | 5.5708 | 0.8613 | 6.4682  | 9.92E-11 | 3.30E-09 |
| ENSBTAG00000008603  | 30.1651    | 5.5707 | 1.0833 | 5.1421  | 2.72E-07 | 4.81E-06 |
| ENSBTAG00000009381  | 323.2472   | 5.5654 | 0.8890 | 6.2600  | 3.85E-10 | 1.16E-08 |
| ENSBTAG00000015311  | 66.7405    | 5.5540 | 0.8849 | 6.2767  | 3.46E-10 | 1.06E-08 |
| ENSBTAG00000034827  | 663.2854   | 5.5512 | 0.4048 | 13.7120 | 8.61E-43 | 5.05E-40 |
| ENSBTAG00000007883  | 484.1313   | 5.5354 | 0.8188 | 6.7605  | 1.37E-11 | 5.31E-10 |
| ENSBTAG00000015609  | 545.5930   | 5.5311 | 0.7756 | 7.1316  | 9.92E-13 | 4.47E-11 |
| ENSBTAG00000010427  | 218.1002   | 5.5127 | 0.6489 | 8.4952  | 1.98E-17 | 1.68E-15 |
| ENSBTAG00000011019  | 31.5448    | 5.5125 | 1.0941 | 5.0381  | 4.70E-07 | 7.79E-06 |
| ENSBTAG00000000306  | 99.4737    | 5.5107 | 0.8869 | 6.2134  | 5.18E-10 | 1.51E-08 |
| ENSBTAG00000014762  | 167.8739   | 5.5106 | 0.8616 | 6.3958  | 1.60E-10 | 5.22E-09 |
| ENSBTAG00000000502  | 50.6477    | 5.4858 | 0.9880 | 5.5523  | 2.82E-08 | 5.88E-07 |
| ENSBTAG00000048122  | 327.5941   | 5.4845 | 0.7140 | 7.6809  | 1.58E-14 | 8.99E-13 |
| ENSBTAG00000018134  | 79.6727    | 5.4625 | 0.9698 | 5.6325  | 1.78E-08 | 3.89E-07 |
| ENSBTAG00000012695  | 412.4479   | 5.4448 | 0.6592 | 8.2594  | 1.46E-16 | 1.11E-14 |



|                    |           |        |        |         |          |          |
|--------------------|-----------|--------|--------|---------|----------|----------|
| ENSBTAG00000021904 | 51.9322   | 5.4426 | 0.9870 | 5.5145  | 3.50E-08 | 7.19E-07 |
| ENSBTAG00000047029 | 1323.1605 | 5.4393 | 0.5173 | 10.5157 | 7.31E-26 | 1.59E-23 |
| ENSBTAG00000010300 | 26.2782   | 5.4257 | 1.0901 | 4.9774  | 6.44E-07 | 1.03E-05 |
| ENSBTAG00000007079 | 1342.4463 | 5.4228 | 0.6980 | 7.7696  | 7.88E-15 | 4.68E-13 |
| ENSBTAG00000015133 | 69.2977   | 5.4177 | 0.9096 | 5.9560  | 2.59E-09 | 6.64E-08 |
| ENSBTAG00000002041 | 204.3453  | 5.4165 | 0.8226 | 6.5848  | 4.55E-11 | 1.62E-09 |
| ENSBTAG00000014199 | 97.9142   | 5.4149 | 1.0133 | 5.3440  | 9.09E-08 | 1.77E-06 |
| ENSBTAG00000020921 | 57.5908   | 5.4140 | 1.0127 | 5.3461  | 8.99E-08 | 1.75E-06 |
| ENSBTAG00000014972 | 119.1000  | 5.4092 | 0.8005 | 6.7570  | 1.41E-11 | 5.43E-10 |
| ENSBTAG00000012478 | 24.8282   | 5.4052 | 1.0879 | 4.9685  | 6.75E-07 | 1.07E-05 |
| ENSBTAG00000011782 | 63.9729   | 5.4006 | 0.9195 | 5.8731  | 4.28E-09 | 1.04E-07 |
| ENSBTAG00000006377 | 160.9074  | 5.4006 | 0.9101 | 5.9339  | 2.96E-09 | 7.53E-08 |
| ENSBTAG00000035183 | 36.4999   | 5.3950 | 1.1175 | 4.8277  | 1.38E-06 | 2.06E-05 |
| ENSBTAG00000021872 | 208.8955  | 5.3802 | 0.6199 | 8.6794  | 3.98E-18 | 3.62E-16 |
| ENSBTAG00000038650 | 37.2345   | 5.3755 | 1.1208 | 4.7963  | 1.62E-06 | 2.36E-05 |
| ENSBTAG00000047107 | 51.4756   | 5.3716 | 0.9998 | 5.3728  | 7.75E-08 | 1.52E-06 |
| ENSBTAG00000010433 | 80.3120   | 5.3473 | 1.1556 | 4.6271  | 3.71E-06 | 4.97E-05 |
| ENSBTAG00000001008 | 93.6416   | 5.3408 | 0.8098 | 6.5955  | 4.24E-11 | 1.52E-09 |
| ENSBTAG00000001197 | 88.9257   | 5.3180 | 0.9216 | 5.7705  | 7.91E-09 | 1.86E-07 |
| ENSBTAG00000021815 | 4586.2537 | 5.3147 | 0.5969 | 8.9040  | 5.39E-19 | 5.50E-17 |
| ENSBTAG00000003436 | 8145.3800 | 5.3060 | 0.3674 | 14.4440 | 2.74E-47 | 2.64E-44 |
| ENSBTAG00000010026 | 133.2658  | 5.3000 | 0.8705 | 6.0885  | 1.14E-09 | 3.12E-08 |
| ENSBTAG00000009717 | 273.1533  | 5.2859 | 0.8346 | 6.3333  | 2.40E-10 | 7.59E-09 |
| ENSBTAG00000026111 | 142.7306  | 5.2813 | 0.9157 | 5.7675  | 8.05E-09 | 1.88E-07 |
| ENSBTAG00000017256 | 98.1490   | 5.2775 | 0.9364 | 5.6362  | 1.74E-08 | 3.82E-07 |
| ENSBTAG00000000641 | 40.0206   | 5.2653 | 0.9681 | 5.4390  | 5.36E-08 | 1.07E-06 |
| ENSBTAG00000010447 | 371.9605  | 5.2630 | 0.6808 | 7.7309  | 1.07E-14 | 6.20E-13 |
| ENSBTAG00000014169 | 202.2771  | 5.2625 | 0.5694 | 9.2424  | 2.41E-20 | 2.85E-18 |
| ENSBTAG00000018164 | 5226.5630 | 5.2596 | 0.6194 | 8.4918  | 2.03E-17 | 1.71E-15 |
| ENSBTAG00000005691 | 3280.1343 | 5.2570 | 0.5479 | 9.5943  | 8.45E-22 | 1.30E-19 |
| ENSBTAG00000019227 | 113.0944  | 5.2473 | 1.0672 | 4.9169  | 8.79E-07 | 1.38E-05 |
| ENSBTAG00000003650 | 708.6262  | 5.2417 | 0.5226 | 10.0297 | 1.13E-23 | 2.11E-21 |
| ENSBTAG00000015710 | 266.4422  | 5.2398 | 0.6552 | 7.9975  | 1.27E-15 | 8.60E-14 |
| ENSBTAG00000008864 | 44.7064   | 5.2377 | 1.0157 | 5.1568  | 2.51E-07 | 4.51E-06 |
| ENSBTAG00000047586 | 64.9970   | 5.2330 | 0.9563 | 5.4723  | 4.44E-08 | 9.01E-07 |
| ENSBTAG00000021029 | 51.9847   | 5.2328 | 1.0451 | 5.0071  | 5.53E-07 | 8.99E-06 |
| ENSBTAG00000016770 | 49.7905   | 5.2327 | 1.0376 | 5.0431  | 4.58E-07 | 7.63E-06 |
| ENSBTAG00000011043 | 587.1969  | 5.2279 | 0.6389 | 8.1826  | 2.78E-16 | 2.00E-14 |
| ENSBTAG00000019272 | 61.6389   | 5.2167 | 1.0583 | 4.9293  | 8.25E-07 | 1.29E-05 |
| ENSBTAG00000004386 | 24.7261   | 5.2144 | 1.1113 | 4.6921  | 2.70E-06 | 3.75E-05 |
| ENSBTAG00000046555 | 106.9174  | 5.2071 | 0.9175 | 5.6754  | 1.38E-08 | 3.08E-07 |
| ENSBTAG00000046324 | 437.0088  | 5.2035 | 0.7730 | 6.7317  | 1.68E-11 | 6.35E-10 |
| ENSBTAG00000007626 | 579.6998  | 5.1881 | 0.7118 | 7.2892  | 3.12E-13 | 1.51E-11 |

|                    |            |        |        |         |           |           |
|--------------------|------------|--------|--------|---------|-----------|-----------|
| ENSBTAG00000020872 | 223.4640   | 5.1804 | 0.8212 | 6.3084  | 2.82E-10  | 8.82E-09  |
| ENSBTAG00000017592 | 5832.6800  | 5.1742 | 0.4284 | 12.0794 | 1.36E-33  | 4.46E-31  |
| ENSBTAG00000001209 | 129.9716   | 5.1697 | 0.8737 | 5.9171  | 3.28E-09  | 8.21E-08  |
| ENSBTAG00000026242 | 25.8201    | 5.1664 | 1.1200 | 4.6129  | 3.97E-06  | 5.28E-05  |
| ENSBTAG00000026326 | 283.0516   | 5.1658 | 0.6540 | 7.8983  | 2.83E-15  | 1.84E-13  |
| ENSBTAG00000032068 | 25.9940    | 5.1647 | 1.1208 | 4.6082  | 4.06E-06  | 5.39E-05  |
| ENSBTAG00000004322 | 3346.2945  | 5.1600 | 0.5448 | 9.4716  | 2.76E-21  | 4.00E-19  |
| ENSBTAG00000001567 | 241.7337   | 5.1583 | 0.5653 | 9.1242  | 7.22E-20  | 8.12E-18  |
| ENSBTAG00000047039 | 24.7078    | 5.1548 | 1.1183 | 4.6095  | 4.04E-06  | 5.36E-05  |
| ENSBTAG00000021647 | 38.4542    | 5.1538 | 1.1442 | 4.5045  | 6.65E-06  | 8.38E-05  |
| ENSBTAG00000004270 | 30.3489    | 5.1404 | 1.1331 | 4.5365  | 5.72E-06  | 7.29E-05  |
| ENSBTAG00000008956 | 56.1036    | 5.1325 | 1.0741 | 4.7783  | 1.77E-06  | 2.55E-05  |
| ENSBTAG00000005958 | 231.4344   | 5.1310 | 0.9379 | 5.4707  | 4.48E-08  | 9.08E-07  |
| ENSBTAG00000010670 | 258.0085   | 5.1308 | 0.8242 | 6.2249  | 4.82E-10  | 1.41E-08  |
| ENSBTAG00000047986 | 39.4004    | 5.1297 | 1.1475 | 4.4704  | 7.81E-06  | 9.70E-05  |
| ENSBTAG00000017839 | 39.9770    | 5.1235 | 1.0168 | 5.0388  | 4.68E-07  | 7.77E-06  |
| ENSBTAG00000011578 | 1001.1047  | 5.1227 | 0.7674 | 6.6753  | 2.47E-11  | 9.12E-10  |
| ENSBTAG00000004680 | 115.6311   | 5.1105 | 0.8905 | 5.7389  | 9.53E-09  | 2.20E-07  |
| ENSBTAG00000007596 | 7645.0201  | 5.1053 | 0.3753 | 13.6039 | 3.79E-42  | 2.05E-39  |
| ENSBTAG00000014127 | 498.5516   | 5.1029 | 0.8118 | 6.2859  | 3.26E-10  | 1.00E-08  |
| ENSBTAG00000013619 | 317.2504   | 5.0991 | 0.7229 | 7.0532  | 1.75E-12  | 7.65E-11  |
| ENSBTAG00000034139 | 100.7302   | 5.0932 | 0.6093 | 8.3591  | 6.32E-17  | 5.04E-15  |
| ENSBTAG00000016061 | 309.7472   | 5.0918 | 0.7749 | 6.5713  | 4.99E-11  | 1.77E-09  |
| ENSBTAG00000000436 | 579.8521   | 5.0889 | 0.6291 | 8.0889  | 6.02E-16  | 4.16E-14  |
| ENSBTAG00000023976 | 242.2018   | 5.0888 | 0.7711 | 6.5993  | 4.13E-11  | 1.48E-09  |
| ENSBTAG00000003994 | 230.5064   | 5.0694 | 0.6961 | 7.2828  | 3.27E-13  | 1.58E-11  |
| ENSBTAG00000037937 | 74.1433    | 5.0583 | 0.9381 | 5.3923  | 6.96E-08  | 1.37E-06  |
| ENSBTAG00000006789 | 15255.4762 | 5.0568 | 0.4026 | 12.5609 | 3.47E-36  | 1.34E-33  |
| ENSBTAG00000018984 | 163.8858   | 5.0499 | 0.8383 | 6.0240  | 1.70E-09  | 4.56E-08  |
| ENSBTAG00000039928 | 126.5606   | 5.0469 | 0.8457 | 5.9679  | 2.40E-09  | 6.23E-08  |
| ENSBTAG00000012847 | 17501.9692 | 5.0439 | 0.2987 | 16.8856 | 5.74E-64  | 1.94E-60  |
| ENSBTAG00000003045 | 1644.9730  | 5.0366 | 0.7457 | 6.7541  | 1.44E-11  | 5.52E-10  |
| ENSBTAG00000013125 | 697.0385   | 5.0297 | 0.7738 | 6.4995  | 8.06E-11  | 2.74E-09  |
| ENSBTAG00000000711 | 503.2281   | 5.0229 | 0.6995 | 7.1803  | 6.96E-13  | 3.21E-11  |
| ENSBTAG00000009353 | 268.9386   | 5.0118 | 0.7544 | 6.6435  | 3.06E-11  | 1.12E-09  |
| ENSBTAG00000006707 | 608.9144   | 5.0087 | 0.6952 | 7.2044  | 5.83E-13  | 2.75E-11  |
| ENSBTAG00000011511 | 209.1005   | 5.0072 | 0.8940 | 5.6006  | 2.14E-08  | 4.59E-07  |
| ENSBTAG00000023338 | 10841.4875 | 5.0041 | 0.2256 | 22.1815 | 5.18E-109 | 6.99E-105 |
| ENSBTAG00000002435 | 116.1260   | 4.9809 | 1.0752 | 4.6326  | 3.61E-06  | 4.85E-05  |
| ENSBTAG00000016944 | 32.8819    | 4.9777 | 0.9885 | 5.0355  | 4.77E-07  | 7.87E-06  |
| ENSBTAG00000005018 | 105.2350   | 4.9667 | 0.8369 | 5.9348  | 2.94E-09  | 7.51E-08  |
| ENSBTAG00000006194 | 107.2551   | 4.9577 | 0.8790 | 5.6400  | 1.70E-08  | 3.75E-07  |
| ENSBTAG00000021842 | 30.9595    | 4.9537 | 1.1525 | 4.2981  | 1.72E-05  | 1.97E-04  |

|                    |            |        |        |         |          |          |
|--------------------|------------|--------|--------|---------|----------|----------|
| ENSBTAG00000020225 | 64.4067    | 4.9482 | 0.9218 | 5.3682  | 7.95E-08 | 1.56E-06 |
| ENSBTAG00000045880 | 94.7082    | 4.9437 | 1.0463 | 4.7249  | 2.30E-06 | 3.22E-05 |
| ENSBTAG00000026779 | 1478.8797  | 4.9396 | 0.8070 | 6.1211  | 9.29E-10 | 2.57E-08 |
| ENSBTAG00000012817 | 419.0302   | 4.9329 | 0.4158 | 11.8645 | 1.81E-32 | 5.67E-30 |
| ENSBTAG00000012406 | 70.9017    | 4.9309 | 0.9766 | 5.0490  | 4.44E-07 | 7.42E-06 |
| ENSBTAG00000018193 | 117.3086   | 4.9231 | 0.7701 | 6.3927  | 1.63E-10 | 5.30E-09 |
| ENSBTAG00000011896 | 21.2465    | 4.9146 | 1.1357 | 4.3274  | 1.51E-05 | 1.75E-04 |
| ENSBTAG00000006851 | 24.9867    | 4.9098 | 1.1459 | 4.2846  | 1.83E-05 | 2.07E-04 |
| ENSBTAG00000020880 | 8776.5526  | 4.9022 | 0.3201 | 15.3139 | 6.17E-53 | 7.57E-50 |
| ENSBTAG00000026825 | 10355.2244 | 4.8775 | 0.3730 | 13.0767 | 4.47E-39 | 1.89E-36 |
| ENSBTAG00000019832 | 337.5933   | 4.8707 | 0.9796 | 4.9720  | 6.63E-07 | 1.06E-05 |
| ENSBTAG00000033565 | 238.4475   | 4.8702 | 0.7168 | 6.7948  | 1.08E-11 | 4.25E-10 |
| ENSBTAG00000031302 | 23.7410    | 4.8635 | 1.1479 | 4.2370  | 2.27E-05 | 2.49E-04 |
| ENSBTAG00000006902 | 22.4172    | 4.8543 | 1.1455 | 4.2376  | 2.26E-05 | 2.49E-04 |
| ENSBTAG00000005234 | 535.1171   | 4.8516 | 0.7717 | 6.2871  | 3.23E-10 | 9.98E-09 |
| ENSBTAG00000000838 | 278.9035   | 4.8494 | 0.5988 | 8.0983  | 5.57E-16 | 3.87E-14 |
| ENSBTAG00000024470 | 48.8652    | 4.8490 | 0.9601 | 5.0504  | 4.41E-07 | 7.38E-06 |
| ENSBTAG00000011784 | 698.6093   | 4.8425 | 0.6847 | 7.0724  | 1.52E-12 | 6.73E-11 |
| ENSBTAG00000047529 | 21.6299    | 4.8392 | 1.1451 | 4.2260  | 2.38E-05 | 2.61E-04 |
| ENSBTAG00000016915 | 249.7909   | 4.8360 | 0.7618 | 6.3480  | 2.18E-10 | 6.93E-09 |
| ENSBTAG00000004305 | 190.9447   | 4.8342 | 1.0530 | 4.5909  | 4.41E-06 | 5.80E-05 |
| ENSBTAG00000018403 | 52.6732    | 4.8300 | 1.0195 | 4.7376  | 2.16E-06 | 3.05E-05 |
| ENSBTAG00000003297 | 52.3410    | 4.8253 | 1.1117 | 4.3403  | 1.42E-05 | 1.67E-04 |
| ENSBTAG00000008631 | 994.6071   | 4.8202 | 0.6748 | 7.1435  | 9.10E-13 | 4.13E-11 |
| ENSBTAG00000018765 | 1003.3590  | 4.8109 | 0.5417 | 8.8815  | 6.60E-19 | 6.69E-17 |
| ENSBTAG00000001443 | 109.5537   | 4.8099 | 0.7997 | 6.0150  | 1.80E-09 | 4.80E-08 |
| ENSBTAG00000022920 | 24151.9735 | 4.8055 | 0.5503 | 8.7328  | 2.49E-18 | 2.31E-16 |
| ENSBTAG00000034366 | 642.7311   | 4.8042 | 0.8060 | 5.9604  | 2.52E-09 | 6.49E-08 |
| ENSBTAG00000010704 | 63.6864    | 4.7912 | 0.9361 | 5.1185  | 3.08E-07 | 5.39E-06 |
| ENSBTAG00000010664 | 73.3043    | 4.7850 | 0.9966 | 4.8013  | 1.58E-06 | 2.31E-05 |
| ENSBTAG00000011411 | 58.9655    | 4.7834 | 0.9430 | 5.0724  | 3.93E-07 | 6.68E-06 |
| ENSBTAG00000005120 | 23.7657    | 4.7800 | 1.1564 | 4.1337  | 3.57E-05 | 3.72E-04 |
| ENSBTAG00000024272 | 91.5317    | 4.7780 | 0.9511 | 5.0238  | 5.07E-07 | 8.32E-06 |
| ENSBTAG00000016345 | 74.4729    | 4.7744 | 0.8066 | 5.9189  | 3.24E-09 | 8.15E-08 |
| ENSBTAG00000005193 | 19.0023    | 4.7740 | 1.1444 | 4.1717  | 3.02E-05 | 3.23E-04 |
| ENSBTAG00000020736 | 195.5608   | 4.7722 | 0.8105 | 5.8877  | 3.92E-09 | 9.62E-08 |
| ENSBTAG00000008897 | 255.7779   | 4.7614 | 0.9163 | 5.1962  | 2.03E-07 | 3.70E-06 |
| ENSBTAG00000015043 | 186.3033   | 4.7603 | 0.7933 | 6.0008  | 1.96E-09 | 5.19E-08 |
| ENSBTAG00000039813 | 19.6162    | 4.7596 | 1.1479 | 4.1463  | 3.38E-05 | 3.56E-04 |
| ENSBTAG00000000432 | 232.5841   | 4.7431 | 0.7717 | 6.1460  | 7.95E-10 | 2.23E-08 |
| ENSBTAG00000030024 | 21.4730    | 4.7413 | 1.1550 | 4.1052  | 4.04E-05 | 4.15E-04 |
| ENSBTAG00000027727 | 21.8195    | 4.7391 | 1.1559 | 4.1000  | 4.13E-05 | 4.23E-04 |
| ENSBTAG00000039372 | 16.8426    | 4.7345 | 1.1411 | 4.1490  | 3.34E-05 | 3.52E-04 |

|                    |           |        |        |         |          |          |
|--------------------|-----------|--------|--------|---------|----------|----------|
| ENSBTAG00000032089 | 35.9666   | 4.7308 | 0.9247 | 5.1162  | 3.12E-07 | 5.43E-06 |
| ENSBTAG00000011734 | 112.3828  | 4.7303 | 0.9102 | 5.1971  | 2.02E-07 | 3.70E-06 |
| ENSBTAG00000014441 | 35.3367   | 4.7280 | 1.0562 | 4.4766  | 7.59E-06 | 9.45E-05 |
| ENSBTAG00000011115 | 160.8593  | 4.7268 | 0.9705 | 4.8706  | 1.11E-06 | 1.72E-05 |
| ENSBTAG00000002096 | 189.0155  | 4.7143 | 0.8417 | 5.6007  | 2.13E-08 | 4.59E-07 |
| ENSBTAG00000020355 | 454.5505  | 4.7128 | 0.7378 | 6.3873  | 1.69E-10 | 5.45E-09 |
| ENSBTAG00000012052 | 33.3320   | 4.7117 | 1.1767 | 4.0042  | 6.22E-05 | 6.07E-04 |
| ENSBTAG00000018774 | 88.3642   | 4.7097 | 0.6540 | 7.2016  | 5.95E-13 | 2.80E-11 |
| ENSBTAG00000006859 | 24.1786   | 4.7045 | 1.1645 | 4.0400  | 5.35E-05 | 5.29E-04 |
| ENSBTAG00000021672 | 96.6246   | 4.7017 | 0.9933 | 4.7334  | 2.21E-06 | 3.10E-05 |
| ENSBTAG00000001444 | 166.3830  | 4.7002 | 0.9022 | 5.2098  | 1.89E-07 | 3.48E-06 |
| ENSBTAG00000013452 | 22.4228   | 4.6991 | 1.1614 | 4.0460  | 5.21E-05 | 5.17E-04 |
| ENSBTAG00000013333 | 42.0842   | 4.6977 | 1.1045 | 4.2532  | 2.11E-05 | 2.35E-04 |
| ENSBTAG00000018015 | 31.1991   | 4.6974 | 1.0390 | 4.5211  | 6.15E-06 | 7.80E-05 |
| ENSBTAG00000006685 | 27.3789   | 4.6933 | 1.1709 | 4.0083  | 6.12E-05 | 5.99E-04 |
| ENSBTAG00000030084 | 29.5590   | 4.6931 | 1.0474 | 4.4805  | 7.45E-06 | 9.29E-05 |
| ENSBTAG00000013689 | 38.3357   | 4.6895 | 1.0766 | 4.3558  | 1.33E-05 | 1.57E-04 |
| ENSBTAG00000037510 | 46.7588   | 4.6889 | 0.9902 | 4.7351  | 2.19E-06 | 3.08E-05 |
| ENSBTAG00000006143 | 119.4404  | 4.6779 | 0.8013 | 5.8379  | 5.29E-09 | 1.27E-07 |
| ENSBTAG00000006601 | 407.7806  | 4.6762 | 0.3963 | 11.7997 | 3.92E-32 | 1.17E-29 |
| ENSBTAG00000017280 | 240.3719  | 4.6756 | 0.5977 | 7.8225  | 5.18E-15 | 3.19E-13 |
| ENSBTAG00000019212 | 61.8440   | 4.6713 | 1.1351 | 4.1154  | 3.86E-05 | 3.99E-04 |
| ENSBTAG00000048268 | 32.5741   | 4.6641 | 1.1797 | 3.9535  | 7.70E-05 | 7.27E-04 |
| ENSBTAG00000011011 | 149.0978  | 4.6640 | 0.7564 | 6.1659  | 7.01E-10 | 1.99E-08 |
| ENSBTAG00000000812 | 44.9617   | 4.6572 | 1.1186 | 4.1635  | 3.13E-05 | 3.34E-04 |
| ENSBTAG00000035224 | 32.3434   | 4.6371 | 1.1816 | 3.9242  | 8.70E-05 | 8.11E-04 |
| ENSBTAG00000010284 | 32.8323   | 4.6348 | 0.9215 | 5.0298  | 4.91E-07 | 8.07E-06 |
| ENSBTAG00000000648 | 23.5992   | 4.6324 | 1.1701 | 3.9590  | 7.53E-05 | 7.14E-04 |
| ENSBTAG00000002596 | 37.7696   | 4.6320 | 1.1867 | 3.9032  | 9.49E-05 | 8.76E-04 |
| ENSBTAG00000007846 | 27.1034   | 4.6204 | 1.0448 | 4.4222  | 9.77E-06 | 1.19E-04 |
| ENSBTAG00000006606 | 52.4218   | 4.6157 | 1.1394 | 4.0510  | 5.10E-05 | 5.07E-04 |
| ENSBTAG00000001725 | 73.0893   | 4.5951 | 1.1562 | 3.9743  | 7.06E-05 | 6.77E-04 |
| ENSBTAG00000021435 | 1103.6723 | 4.5949 | 0.8180 | 5.6171  | 1.94E-08 | 4.22E-07 |
| ENSBTAG00000030426 | 17.2039   | 4.5902 | 1.1585 | 3.9621  | 7.43E-05 | 7.06E-04 |
| ENSBTAG00000021901 | 56.1417   | 4.5896 | 0.9703 | 4.7300  | 2.25E-06 | 3.15E-05 |
| ENSBTAG00000013429 | 18.8263   | 4.5817 | 1.1643 | 3.9353  | 8.31E-05 | 7.76E-04 |
| ENSBTAG00000012737 | 37.2447   | 4.5791 | 0.9887 | 4.6313  | 3.63E-06 | 4.88E-05 |
| ENSBTAG00000019517 | 217.3514  | 4.5660 | 0.9518 | 4.7973  | 1.61E-06 | 2.35E-05 |
| ENSBTAG00000014217 | 48.2705   | 4.5636 | 1.0449 | 4.3675  | 1.26E-05 | 1.49E-04 |
| ENSBTAG00000018203 | 52.2790   | 4.5624 | 0.9874 | 4.6206  | 3.83E-06 | 5.11E-05 |
| ENSBTAG00000011563 | 23.6252   | 4.5605 | 1.0088 | 4.5207  | 6.16E-06 | 7.80E-05 |
| ENSBTAG00000010303 | 526.5848  | 4.5538 | 0.7578 | 6.0095  | 1.86E-09 | 4.94E-08 |
| ENSBTAG00000007921 | 49.3156   | 4.5511 | 0.9702 | 4.6910  | 2.72E-06 | 3.76E-05 |

|                    |           |        |        |         |          |          |
|--------------------|-----------|--------|--------|---------|----------|----------|
| ENSBTAG00000014554 | 44.7854   | 4.5439 | 1.1338 | 4.0075  | 6.14E-05 | 6.00E-04 |
| ENSBTAG00000014038 | 26.3794   | 4.5413 | 1.0569 | 4.2967  | 1.73E-05 | 1.98E-04 |
| ENSBTAG00000027051 | 601.7902  | 4.5379 | 0.8441 | 5.3763  | 7.60E-08 | 1.50E-06 |
| ENSBTAG00000035868 | 30.6031   | 4.5325 | 1.0682 | 4.2430  | 2.21E-05 | 2.44E-04 |
| ENSBTAG00000005501 | 1874.0293 | 4.5298 | 0.8220 | 5.5104  | 3.58E-08 | 7.34E-07 |
| ENSBTAG00000047121 | 16.0930   | 4.5167 | 1.1626 | 3.8849  | 1.02E-04 | 9.37E-04 |
| ENSBTAG00000009614 | 100.0067  | 4.5149 | 0.8063 | 5.5997  | 2.15E-08 | 4.61E-07 |
| ENSBTAG00000003382 | 47.2360   | 4.5038 | 0.9172 | 4.9101  | 9.10E-07 | 1.42E-05 |
| ENSBTAG00000002333 | 117.8082  | 4.4994 | 0.9018 | 4.9895  | 6.05E-07 | 9.80E-06 |
| ENSBTAG00000018994 | 27.5068   | 4.4944 | 1.0566 | 4.2537  | 2.10E-05 | 2.35E-04 |
| ENSBTAG00000038985 | 14.8645   | 4.4899 | 1.1608 | 3.8679  | 1.10E-04 | 9.97E-04 |
| ENSBTAG00000018869 | 135.3945  | 4.4886 | 0.8393 | 5.3480  | 8.89E-08 | 1.74E-06 |
| ENSBTAG00000017473 | 39.1767   | 4.4873 | 1.1275 | 3.9797  | 6.90E-05 | 6.64E-04 |
| ENSBTAG00000046152 | 24.9383   | 4.4817 | 1.1855 | 3.7805  | 1.57E-04 | 1.36E-03 |
| ENSBTAG00000037989 | 41.9615   | 4.4805 | 1.0315 | 4.3438  | 1.40E-05 | 1.65E-04 |
| ENSBTAG00000010452 | 82.9026   | 4.4782 | 1.0993 | 4.0736  | 4.63E-05 | 4.65E-04 |
| ENSBTAG00000003961 | 31.2000   | 4.4770 | 1.0821 | 4.1375  | 3.51E-05 | 3.68E-04 |
| ENSBTAG00000016615 | 6947.2718 | 4.4749 | 0.5143 | 8.7004  | 3.31E-18 | 3.03E-16 |
| ENSBTAG00000017138 | 21.0818   | 4.4713 | 1.1800 | 3.7892  | 1.51E-04 | 1.32E-03 |
| ENSBTAG00000007927 | 25.3470   | 4.4711 | 1.0453 | 4.2774  | 1.89E-05 | 2.13E-04 |
| ENSBTAG00000031647 | 38.3084   | 4.4621 | 1.0116 | 4.4111  | 1.03E-05 | 1.25E-04 |
| ENSBTAG00000006703 | 34.1140   | 4.4602 | 1.1149 | 4.0006  | 6.32E-05 | 6.13E-04 |
| ENSBTAG00000000357 | 73.0759   | 4.4559 | 0.6336 | 7.0327  | 2.03E-12 | 8.76E-11 |
| ENSBTAG00000013241 | 27.7692   | 4.4538 | 0.9159 | 4.8628  | 1.16E-06 | 1.77E-05 |
| ENSBTAG00000014798 | 13.2733   | 4.4509 | 1.1585 | 3.8420  | 1.22E-04 | 1.09E-03 |
| ENSBTAG00000015060 | 148.7272  | 4.4460 | 0.9188 | 4.8392  | 1.30E-06 | 1.96E-05 |
| ENSBTAG00000001154 | 606.2876  | 4.4443 | 0.6166 | 7.2080  | 5.68E-13 | 2.70E-11 |
| ENSBTAG00000032277 | 16.1799   | 4.4403 | 1.1709 | 3.7924  | 1.49E-04 | 1.30E-03 |
| ENSBTAG00000000842 | 77.4983   | 4.4367 | 0.7513 | 5.9055  | 3.52E-09 | 8.75E-08 |
| ENSBTAG00000015032 | 1044.1559 | 4.4331 | 0.8180 | 5.4197  | 5.97E-08 | 1.19E-06 |
| ENSBTAG00000012046 | 3742.7196 | 4.4276 | 0.4718 | 9.3848  | 6.30E-21 | 8.94E-19 |
| ENSBTAG00000014088 | 45.7249   | 4.4222 | 0.8581 | 5.1536  | 2.55E-07 | 4.57E-06 |
| ENSBTAG00000017040 | 84.5482   | 4.4208 | 0.7056 | 6.2654  | 3.72E-10 | 1.13E-08 |
| ENSBTAG00000021249 | 62.8625   | 4.4044 | 0.9808 | 4.4907  | 7.10E-06 | 8.91E-05 |
| ENSBTAG00000031020 | 19.8113   | 4.3918 | 1.1846 | 3.7074  | 2.09E-04 | 1.74E-03 |
| ENSBTAG00000018146 | 60.2887   | 4.3875 | 1.0008 | 4.3841  | 1.16E-05 | 1.39E-04 |
| ENSBTAG00000039466 | 1300.4519 | 4.3873 | 0.4631 | 9.4732  | 2.71E-21 | 3.98E-19 |
| ENSBTAG00000021709 | 355.1579  | 4.3869 | 0.8655 | 5.0687  | 4.01E-07 | 6.78E-06 |
| ENSBTAG00000004608 | 16.2910   | 4.3808 | 1.1771 | 3.7217  | 1.98E-04 | 1.66E-03 |
| ENSBTAG00000012007 | 546.6957  | 4.3795 | 0.4179 | 10.4791 | 1.08E-25 | 2.31E-23 |
| ENSBTAG00000008008 | 463.8275  | 4.3640 | 0.7219 | 6.0449  | 1.49E-09 | 4.04E-08 |
| ENSBTAG00000031750 | 266.8580  | 4.3600 | 0.6994 | 6.2338  | 4.55E-10 | 1.35E-08 |
| ENSBTAG00000039347 | 19.5861   | 4.3495 | 1.1879 | 3.6615  | 2.51E-04 | 2.03E-03 |

|                    |           |        |        |         |          |          |
|--------------------|-----------|--------|--------|---------|----------|----------|
| ENSBTAG00000038494 | 21.7736   | 4.3403 | 1.1925 | 3.6396  | 2.73E-04 | 2.17E-03 |
| ENSBTAG00000010047 | 31.8096   | 4.3231 | 1.0151 | 4.2589  | 2.05E-05 | 2.30E-04 |
| ENSBTAG00000004337 | 27.0533   | 4.3193 | 0.9568 | 4.5142  | 6.36E-06 | 8.04E-05 |
| ENSBTAG00000005647 | 30.3401   | 4.3172 | 0.9625 | 4.4854  | 7.28E-06 | 9.10E-05 |
| ENSBTAG00000009156 | 37.5143   | 4.3136 | 0.9246 | 4.6656  | 3.08E-06 | 4.19E-05 |
| ENSBTAG00000018744 | 5026.7370 | 4.3120 | 0.5279 | 8.1683  | 3.13E-16 | 2.22E-14 |
| ENSBTAG00000019524 | 18.5337   | 4.3090 | 1.0300 | 4.1835  | 2.87E-05 | 3.08E-04 |
| ENSBTAG00000020676 | 27.3285   | 4.3083 | 1.1093 | 3.8836  | 1.03E-04 | 9.41E-04 |
| ENSBTAG00000000820 | 71.2845   | 4.2950 | 1.1908 | 3.6068  | 3.10E-04 | 2.41E-03 |
| ENSBTAG00000007531 | 187.5867  | 4.2874 | 0.9234 | 4.6430  | 3.43E-06 | 4.64E-05 |
| ENSBTAG00000032289 | 72.8336   | 4.2865 | 0.8597 | 4.9862  | 6.16E-07 | 9.94E-06 |
| ENSBTAG00000004741 | 14.4277   | 4.2837 | 1.1809 | 3.6275  | 2.86E-04 | 2.26E-03 |
| ENSBTAG00000011481 | 46.7883   | 4.2836 | 1.0826 | 3.9567  | 7.60E-05 | 7.19E-04 |
| ENSBTAG00000010349 | 704.8808  | 4.2818 | 0.5453 | 7.8520  | 4.09E-15 | 2.59E-13 |
| ENSBTAG00000010963 | 62.9913   | 4.2750 | 0.9195 | 4.6493  | 3.33E-06 | 4.51E-05 |
| ENSBTAG00000027444 | 171.0408  | 4.2739 | 0.7644 | 5.5910  | 2.26E-08 | 4.83E-07 |
| ENSBTAG00000022759 | 15.8569   | 4.2715 | 1.1862 | 3.6008  | 3.17E-04 | 2.46E-03 |
| ENSBTAG00000003276 | 97.4279   | 4.2635 | 0.8319 | 5.1249  | 2.98E-07 | 5.23E-06 |
| ENSBTAG00000013066 | 2306.8072 | 4.2623 | 0.8360 | 5.0984  | 3.43E-07 | 5.90E-06 |
| ENSBTAG00000000240 | 2070.5105 | 4.2598 | 0.4359 | 9.7728  | 1.47E-22 | 2.48E-20 |
| ENSBTAG00000009012 | 4199.1588 | 4.2577 | 1.1000 | 3.8706  | 1.09E-04 | 9.88E-04 |
| ENSBTAG00000010057 | 22.2148   | 4.2576 | 1.1998 | 3.5486  | 3.87E-04 | 2.93E-03 |
| ENSBTAG00000008550 | 181.8993  | 4.2566 | 0.9634 | 4.4182  | 9.95E-06 | 1.21E-04 |
| ENSBTAG00000005622 | 6656.0757 | 4.2528 | 0.3037 | 14.0023 | 1.51E-44 | 1.02E-41 |
| ENSBTAG00000008555 | 18.2566   | 4.2511 | 1.1938 | 3.5610  | 3.69E-04 | 2.81E-03 |
| ENSBTAG00000012223 | 14.2116   | 4.2489 | 1.1836 | 3.5898  | 3.31E-04 | 2.55E-03 |
| ENSBTAG00000016593 | 496.6370  | 4.2463 | 0.7036 | 6.0353  | 1.59E-09 | 4.26E-08 |
| ENSBTAG00000000581 | 98.3827   | 4.2458 | 0.7976 | 5.3231  | 1.02E-07 | 1.97E-06 |
| ENSBTAG00000007635 | 14.0606   | 4.2429 | 1.1837 | 3.5844  | 3.38E-04 | 2.60E-03 |
| ENSBTAG00000039929 | 89.2484   | 4.2417 | 0.8201 | 5.1719  | 2.32E-07 | 4.18E-06 |
| ENSBTAG00000002917 | 7294.5155 | 4.2404 | 0.6099 | 6.9529  | 3.58E-12 | 1.48E-10 |
| ENSBTAG00000004558 | 179.9992  | 4.2389 | 0.7023 | 6.0361  | 1.58E-09 | 4.25E-08 |
| ENSBTAG00000046733 | 53.1443   | 4.2318 | 0.8316 | 5.0886  | 3.61E-07 | 6.16E-06 |
| ENSBTAG00000021445 | 44.9021   | 4.2298 | 0.9198 | 4.5986  | 4.25E-06 | 5.61E-05 |
| ENSBTAG00000002585 | 30.5726   | 4.2274 | 0.8507 | 4.9695  | 6.71E-07 | 1.07E-05 |
| ENSBTAG00000030340 | 134.9895  | 4.2265 | 0.7742 | 5.4590  | 4.79E-08 | 9.67E-07 |
| ENSBTAG00000019788 | 29.1537   | 4.2176 | 1.1332 | 3.7220  | 1.98E-04 | 1.66E-03 |
| ENSBTAG00000012020 | 29.7968   | 4.2060 | 1.1218 | 3.7494  | 1.77E-04 | 1.51E-03 |
| ENSBTAG00000005313 | 189.5824  | 4.2054 | 0.6686 | 6.2899  | 3.18E-10 | 9.87E-09 |
| ENSBTAG00000009691 | 47.9834   | 4.1928 | 0.8202 | 5.1121  | 3.19E-07 | 5.53E-06 |
| ENSBTAG00000011236 | 87.9761   | 4.1884 | 0.8411 | 4.9795  | 6.38E-07 | 1.02E-05 |
| ENSBTAG00000007300 | 311.7247  | 4.1805 | 0.5402 | 7.7391  | 1.00E-14 | 5.85E-13 |
| ENSBTAG00000019567 | 35.3391   | 4.1796 | 0.9693 | 4.3121  | 1.62E-05 | 1.87E-04 |

|                    |            |        |        |         |          |          |
|--------------------|------------|--------|--------|---------|----------|----------|
| ENSBTAG00000006039 | 690.8921   | 4.1795 | 0.8265 | 5.0568  | 4.26E-07 | 7.16E-06 |
| ENSBTAG00000014560 | 40.9786    | 4.1742 | 0.9150 | 4.5619  | 5.07E-06 | 6.56E-05 |
| ENSBTAG00000008471 | 171.4890   | 4.1733 | 0.9106 | 4.5831  | 4.58E-06 | 6.00E-05 |
| ENSBTAG00000037735 | 266.3541   | 4.1712 | 0.8261 | 5.0494  | 4.43E-07 | 7.41E-06 |
| ENSBTAG00000018810 | 1618.1637  | 4.1688 | 0.9046 | 4.6084  | 4.06E-06 | 5.38E-05 |
| ENSBTAG00000010521 | 20.8556    | 4.1680 | 1.0712 | 3.8911  | 9.98E-05 | 9.17E-04 |
| ENSBTAG00000009125 | 11.6356    | 4.1653 | 1.1822 | 3.5233  | 4.26E-04 | 3.18E-03 |
| ENSBTAG00000001410 | 16073.3931 | 4.1648 | 0.6283 | 6.6285  | 3.39E-11 | 1.23E-09 |
| ENSBTAG00000015157 | 20.9114    | 4.1642 | 1.0725 | 3.8828  | 1.03E-04 | 9.44E-04 |
| ENSBTAG00000000571 | 40.8857    | 4.1637 | 1.0109 | 4.1190  | 3.81E-05 | 3.93E-04 |
| ENSBTAG00000026080 | 19.5124    | 4.1535 | 1.2040 | 3.4497  | 5.61E-04 | 4.04E-03 |
| ENSBTAG00000008959 | 115.7302   | 4.1530 | 0.6486 | 6.4032  | 1.52E-10 | 4.99E-09 |
| ENSBTAG00000012419 | 44.6598    | 4.1525 | 0.9664 | 4.2967  | 1.73E-05 | 1.98E-04 |
| ENSBTAG00000023648 | 28.7540    | 4.1462 | 1.2142 | 3.4146  | 6.39E-04 | 4.50E-03 |
| ENSBTAG00000023372 | 72.6267    | 4.1447 | 0.7948 | 5.2146  | 1.84E-07 | 3.39E-06 |
| ENSBTAG00000013147 | 17.4543    | 4.1438 | 1.0580 | 3.9165  | 8.98E-05 | 8.33E-04 |
| ENSBTAG00000000005 | 178.6587   | 4.1428 | 0.6440 | 6.4325  | 1.26E-10 | 4.13E-09 |
| ENSBTAG00000014707 | 3933.8267  | 4.1418 | 0.8251 | 5.0197  | 5.18E-07 | 8.49E-06 |
| ENSBTAG00000019633 | 113.9207   | 4.1412 | 0.6420 | 6.4504  | 1.12E-10 | 3.70E-09 |
| ENSBTAG00000019711 | 27.0432    | 4.1369 | 1.0195 | 4.0578  | 4.95E-05 | 4.94E-04 |
| ENSBTAG00000037527 | 170.2118   | 4.1358 | 0.8534 | 4.8462  | 1.26E-06 | 1.89E-05 |
| ENSBTAG00000014823 | 80439.8048 | 4.1281 | 0.5476 | 7.5379  | 4.78E-14 | 2.59E-12 |
| ENSBTAG00000018059 | 20.8331    | 4.1261 | 1.0993 | 3.7535  | 1.74E-04 | 1.49E-03 |
| ENSBTAG00000046727 | 26.4480    | 4.1237 | 1.0162 | 4.0579  | 4.95E-05 | 4.94E-04 |
| ENSBTAG00000009848 | 23.6066    | 4.1163 | 1.1215 | 3.6702  | 2.42E-04 | 1.97E-03 |
| ENSBTAG00000016906 | 42.1572    | 4.1153 | 0.7863 | 5.2337  | 1.66E-07 | 3.09E-06 |
| ENSBTAG00000014228 | 56.7041    | 4.1142 | 0.9928 | 4.1441  | 3.41E-05 | 3.58E-04 |
| ENSBTAG00000040399 | 35.5405    | 4.1105 | 0.9774 | 4.2058  | 2.60E-05 | 2.82E-04 |
| ENSBTAG00000025792 | 13.0149    | 4.1054 | 1.1935 | 3.4399  | 5.82E-04 | 4.17E-03 |
| ENSBTAG00000020455 | 10763.5616 | 4.1052 | 0.2197 | 18.6833 | 6.78E-78 | 4.57E-74 |
| ENSBTAG00000017390 | 16.1936    | 4.1043 | 1.0287 | 3.9899  | 6.61E-05 | 6.39E-04 |
| ENSBTAG00000013736 | 39.1019    | 4.0977 | 1.2224 | 3.3521  | 8.02E-04 | 5.44E-03 |
| ENSBTAG00000001325 | 11.1758    | 4.0932 | 1.1877 | 3.4465  | 5.68E-04 | 4.08E-03 |
| ENSBTAG00000002699 | 792.7419   | 4.0932 | 0.9509 | 4.3046  | 1.67E-05 | 1.93E-04 |
| ENSBTAG00000013957 | 14.2706    | 4.0916 | 1.1985 | 3.4139  | 6.40E-04 | 4.51E-03 |
| ENSBTAG00000002859 | 16.4270    | 4.0866 | 1.0576 | 3.8639  | 1.12E-04 | 1.01E-03 |
| ENSBTAG00000011584 | 1117.0100  | 4.0821 | 0.6807 | 5.9972  | 2.01E-09 | 5.28E-08 |
| ENSBTAG00000006694 | 39.3720    | 4.0740 | 1.0924 | 3.7294  | 1.92E-04 | 1.62E-03 |
| ENSBTAG00000000244 | 345.1683   | 4.0712 | 1.0161 | 4.0066  | 6.16E-05 | 6.02E-04 |
| ENSBTAG00000005218 | 51.1785    | 4.0709 | 1.0284 | 3.9585  | 7.54E-05 | 7.15E-04 |
| ENSBTAG00000045849 | 330.7912   | 4.0701 | 0.6822 | 5.9663  | 2.43E-09 | 6.28E-08 |
| ENSBTAG00000006797 | 141.1933   | 4.0665 | 0.7138 | 5.6969  | 1.22E-08 | 2.76E-07 |
| ENSBTAG00000014455 | 684.1043   | 4.0650 | 0.4708 | 8.6345  | 5.90E-18 | 5.34E-16 |

|                    |           |        |        |         |          |          |
|--------------------|-----------|--------|--------|---------|----------|----------|
| ENSBTAG00000038495 | 96.0300   | 4.0621 | 1.0559 | 3.8470  | 1.20E-04 | 1.07E-03 |
| ENSBTAG00000021145 | 89.0020   | 4.0595 | 0.8042 | 5.0481  | 4.46E-07 | 7.45E-06 |
| ENSBTAG00000020674 | 223.5519  | 4.0561 | 0.7117 | 5.6990  | 1.21E-08 | 2.74E-07 |
| ENSBTAG00000048155 | 783.7776  | 4.0557 | 1.1877 | 3.4148  | 6.38E-04 | 4.50E-03 |
| ENSBTAG00000014612 | 190.5284  | 4.0545 | 0.8751 | 4.6330  | 3.60E-06 | 4.85E-05 |
| ENSBTAG00000012623 | 189.8271  | 4.0542 | 0.6190 | 6.5498  | 5.76E-11 | 1.99E-09 |
| ENSBTAG00000006155 | 47.3349   | 4.0527 | 1.0665 | 3.8001  | 1.45E-04 | 1.27E-03 |
| ENSBTAG00000005290 | 18.0372   | 4.0517 | 1.0663 | 3.7998  | 1.45E-04 | 1.27E-03 |
| ENSBTAG00000003334 | 98.0411   | 4.0503 | 0.7987 | 5.0708  | 3.96E-07 | 6.73E-06 |
| ENSBTAG00000021215 | 692.6760  | 4.0426 | 0.8898 | 4.5430  | 5.55E-06 | 7.11E-05 |
| ENSBTAG00000005477 | 2360.4130 | 4.0406 | 0.6275 | 6.4392  | 1.20E-10 | 3.96E-09 |
| ENSBTAG00000013368 | 60.0560   | 4.0366 | 0.9453 | 4.2703  | 1.95E-05 | 2.19E-04 |
| ENSBTAG00000046280 | 11.7901   | 4.0340 | 1.1960 | 3.3729  | 7.44E-04 | 5.12E-03 |
| ENSBTAG00000013472 | 4098.3256 | 4.0332 | 0.8615 | 4.6818  | 2.84E-06 | 3.92E-05 |
| ENSBTAG00000014090 | 301.1245  | 4.0289 | 0.7453 | 5.4058  | 6.45E-08 | 1.28E-06 |
| ENSBTAG00000012626 | 4561.4211 | 4.0241 | 0.2914 | 13.8091 | 2.25E-43 | 1.44E-40 |
| ENSBTAG00000012526 | 278.0592  | 4.0216 | 0.7002 | 5.7435  | 9.27E-09 | 2.16E-07 |
| ENSBTAG00000005021 | 290.1242  | 4.0198 | 0.6837 | 5.8792  | 4.12E-09 | 1.01E-07 |
| ENSBTAG00000045877 | 1317.9289 | 4.0151 | 0.2979 | 13.4775 | 2.12E-41 | 1.06E-38 |
| ENSBTAG00000012349 | 18.7598   | 4.0144 | 1.2135 | 3.3080  | 9.40E-04 | 6.16E-03 |
| ENSBTAG00000004580 | 20.4194   | 4.0142 | 1.2157 | 3.3019  | 9.60E-04 | 6.26E-03 |
| ENSBTAG00000012674 | 6428.7515 | 4.0044 | 0.5999 | 6.6747  | 2.48E-11 | 9.13E-10 |
| ENSBTAG00000031444 | 56.8334   | 4.0017 | 0.8624 | 4.6403  | 3.48E-06 | 4.69E-05 |
| ENSBTAG00000024394 | 15.4084   | 4.0014 | 1.2088 | 3.3102  | 9.32E-04 | 6.13E-03 |
| ENSBTAG00000013201 | 88.3757   | 4.0007 | 0.8574 | 4.6660  | 3.07E-06 | 4.19E-05 |
| ENSBTAG00000026067 | 20.6619   | 3.9978 | 1.1040 | 3.6214  | 2.93E-04 | 2.30E-03 |
| ENSBTAG00000014496 | 14.8940   | 3.9971 | 1.2081 | 3.3086  | 9.38E-04 | 6.15E-03 |
| ENSBTAG00000032125 | 15.6835   | 3.9961 | 1.0693 | 3.7370  | 1.86E-04 | 1.58E-03 |
| ENSBTAG00000017617 | 158.4949  | 3.9916 | 0.6712 | 5.9466  | 2.74E-09 | 7.00E-08 |
| ENSBTAG00000007280 | 22.5538   | 3.9872 | 1.0048 | 3.9682  | 7.24E-05 | 6.92E-04 |
| ENSBTAG00000004917 | 18.4297   | 3.9764 | 1.2159 | 3.2703  | 1.07E-03 | 6.87E-03 |
| ENSBTAG00000014046 | 26.6775   | 3.9762 | 1.0613 | 3.7466  | 1.79E-04 | 1.53E-03 |
| ENSBTAG00000000816 | 1468.6712 | 3.9694 | 0.3952 | 10.0441 | 9.76E-24 | 1.85E-21 |
| ENSBTAG00000036154 | 15.3533   | 3.9670 | 1.0715 | 3.7022  | 2.14E-04 | 1.77E-03 |
| ENSBTAG00000013670 | 118.3440  | 3.9611 | 0.8210 | 4.8248  | 1.40E-06 | 2.08E-05 |
| ENSBTAG00000003707 | 41.0170   | 3.9558 | 1.0034 | 3.9423  | 8.07E-05 | 7.58E-04 |
| ENSBTAG00000046461 | 10.5929   | 3.9534 | 1.1990 | 3.2971  | 9.77E-04 | 6.35E-03 |
| ENSBTAG00000008819 | 9.7040    | 3.9465 | 1.1957 | 3.3006  | 9.65E-04 | 6.29E-03 |
| ENSBTAG00000038464 | 22.7962   | 3.9445 | 1.0221 | 3.8594  | 1.14E-04 | 1.03E-03 |
| ENSBTAG00000020990 | 16.2606   | 3.9428 | 1.0904 | 3.6157  | 2.99E-04 | 2.35E-03 |
| ENSBTAG00000021283 | 18.0672   | 3.9359 | 1.0924 | 3.6029  | 3.15E-04 | 2.45E-03 |
| ENSBTAG00000005049 | 9.4606    | 3.9357 | 1.1956 | 3.2919  | 9.95E-04 | 6.45E-03 |
| ENSBTAG00000046144 | 10.2167   | 3.9072 | 1.2019 | 3.2508  | 1.15E-03 | 7.26E-03 |



|                     |            |        |        |         |          |          |
|---------------------|------------|--------|--------|---------|----------|----------|
| ENSBTAG00000022819  | 21.8093    | 3.9061 | 1.0191 | 3.8329  | 1.27E-04 | 1.13E-03 |
| ENSBTAG00000025782  | 19.8396    | 3.9018 | 0.9842 | 3.9644  | 7.36E-05 | 7.02E-04 |
| ENSBTAG00000006608  | 67.4652    | 3.9000 | 0.8138 | 4.7924  | 1.65E-06 | 2.40E-05 |
| ENSBTAG00000003668  | 29.0604    | 3.8967 | 0.9726 | 4.0063  | 6.17E-05 | 6.02E-04 |
| ENSBTAG00000008223  | 127.5209   | 3.8935 | 0.9997 | 3.8945  | 9.84E-05 | 9.06E-04 |
| ENSBTAG00000012931  | 2250.6450  | 3.8842 | 0.3403 | 11.4129 | 3.60E-30 | 9.72E-28 |
| ENSBTAG00000009493  | 383.4560   | 3.8837 | 0.7443 | 5.2177  | 1.81E-07 | 3.35E-06 |
| ENSBTAG000000031184 | 2224.8107  | 3.8833 | 1.1031 | 3.5204  | 4.31E-04 | 3.21E-03 |
| ENSBTAG00000014151  | 103.2563   | 3.8830 | 0.8248 | 4.7075  | 2.51E-06 | 3.48E-05 |
| ENSBTAG00000039237  | 38.5161    | 3.8823 | 1.2342 | 3.1457  | 1.66E-03 | 9.78E-03 |
| ENSBTAG00000010032  | 66.8218    | 3.8808 | 1.2148 | 3.1945  | 1.40E-03 | 8.53E-03 |
| ENSBTAG00000008636  | 1416.6220  | 3.8755 | 1.2145 | 3.1911  | 1.42E-03 | 8.59E-03 |
| ENSBTAG00000004557  | 13.6568    | 3.8747 | 1.2153 | 3.1884  | 1.43E-03 | 8.66E-03 |
| ENSBTAG00000020313  | 81.6640    | 3.8725 | 0.9266 | 4.1794  | 2.92E-05 | 3.13E-04 |
| ENSBTAG00000007409  | 31.3296    | 3.8714 | 1.0304 | 3.7571  | 1.72E-04 | 1.47E-03 |
| ENSBTAG00000007592  | 67.2580    | 3.8685 | 0.8452 | 4.5769  | 4.72E-06 | 6.14E-05 |
| ENSBTAG000000031524 | 33.5704    | 3.8652 | 0.8887 | 4.3494  | 1.36E-05 | 1.61E-04 |
| ENSBTAG000000031998 | 584.3988   | 3.8632 | 0.7083 | 5.4540  | 4.93E-08 | 9.91E-07 |
| ENSBTAG00000010027  | 16.8841    | 3.8595 | 1.2221 | 3.1580  | 1.59E-03 | 9.44E-03 |
| ENSBTAG00000014725  | 56.2834    | 3.8585 | 0.8289 | 4.6552  | 3.24E-06 | 4.39E-05 |
| ENSBTAG00000012700  | 136.2740   | 3.8563 | 0.6767 | 5.6984  | 1.21E-08 | 2.74E-07 |
| ENSBTAG00000009292  | 19.9199    | 3.8556 | 1.2260 | 3.1449  | 1.66E-03 | 9.80E-03 |
| ENSBTAG00000006541  | 287.2172   | 3.8531 | 0.9458 | 4.0740  | 4.62E-05 | 4.65E-04 |
| ENSBTAG00000002190  | 146.9705   | 3.8506 | 0.8686 | 4.4332  | 9.28E-06 | 1.13E-04 |
| ENSBTAG00000001060  | 200.9029   | 3.8501 | 0.8983 | 4.2862  | 1.82E-05 | 2.06E-04 |
| ENSBTAG00000006864  | 594.5267   | 3.8454 | 0.7623 | 5.0446  | 4.54E-07 | 7.57E-06 |
| ENSBTAG00000000706  | 2573.7218  | 3.8447 | 0.5065 | 7.5906  | 3.18E-14 | 1.74E-12 |
| ENSBTAG00000010888  | 382.1166   | 3.8445 | 0.7601 | 5.0577  | 4.24E-07 | 7.14E-06 |
| ENSBTAG00000008142  | 353.7349   | 3.8428 | 0.6144 | 6.2542  | 4.00E-10 | 1.19E-08 |
| ENSBTAG000000039588 | 22.1431    | 3.8351 | 1.1429 | 3.3556  | 7.92E-04 | 5.40E-03 |
| ENSBTAG00000046076  | 10.0837    | 3.8333 | 1.2083 | 3.1726  | 1.51E-03 | 9.05E-03 |
| ENSBTAG00000020172  | 21.2393    | 3.8328 | 1.0135 | 3.7819  | 1.56E-04 | 1.35E-03 |
| ENSBTAG00000004587  | 376.6274   | 3.8306 | 0.5913 | 6.4782  | 9.28E-11 | 3.11E-09 |
| ENSBTAG00000000381  | 21.8528    | 3.8290 | 1.1422 | 3.3523  | 8.01E-04 | 5.44E-03 |
| ENSBTAG00000013919  | 432.3084   | 3.8288 | 0.7213 | 5.3083  | 1.11E-07 | 2.12E-06 |
| ENSBTAG00000011095  | 44.7207    | 3.8288 | 1.1641 | 3.2889  | 1.01E-03 | 6.49E-03 |
| ENSBTAG00000030775  | 47.0307    | 3.8285 | 0.8015 | 4.7767  | 1.78E-06 | 2.57E-05 |
| ENSBTAG00000011518  | 14.3433    | 3.8274 | 1.0687 | 3.5815  | 3.42E-04 | 2.62E-03 |
| ENSBTAG00000010645  | 1929.3493  | 3.8248 | 0.7917 | 4.8314  | 1.36E-06 | 2.03E-05 |
| ENSBTAG000000039160 | 162.5770   | 3.8234 | 0.9261 | 4.1285  | 3.65E-05 | 3.79E-04 |
| ENSBTAG00000007581  | 100.0186   | 3.8223 | 0.8865 | 4.3117  | 1.62E-05 | 1.87E-04 |
| ENSBTAG000000038490 | 23.5084    | 3.8195 | 1.0694 | 3.5716  | 3.55E-04 | 2.72E-03 |
| ENSBTAG00000003312  | 10997.0930 | 3.8177 | 0.8055 | 4.7398  | 2.14E-06 | 3.02E-05 |

|                    |            |        |        |         |          |          |
|--------------------|------------|--------|--------|---------|----------|----------|
| ENSBTAG00000017826 | 42.3465    | 3.8144 | 1.0447 | 3.6511  | 2.61E-04 | 2.10E-03 |
| ENSBTAG00000021855 | 128.1669   | 3.8074 | 0.4861 | 7.8322  | 4.79E-15 | 2.99E-13 |
| ENSBTAG00000007990 | 19.2154    | 3.8041 | 1.0069 | 3.7780  | 1.58E-04 | 1.37E-03 |
| ENSBTAG00000013064 | 18.4053    | 3.8007 | 1.1409 | 3.3313  | 8.64E-04 | 5.76E-03 |
| ENSBTAG00000014698 | 43.8158    | 3.7842 | 1.0077 | 3.7551  | 1.73E-04 | 1.48E-03 |
| ENSBTAG00000043695 | 37.8612    | 3.7830 | 1.1625 | 3.2542  | 1.14E-03 | 7.18E-03 |
| ENSBTAG00000017287 | 118.3858   | 3.7780 | 0.8698 | 4.3436  | 1.40E-05 | 1.65E-04 |
| ENSBTAG00000047449 | 70.9275    | 3.7700 | 0.9377 | 4.0206  | 5.81E-05 | 5.71E-04 |
| ENSBTAG00000010693 | 1898.0835  | 3.7637 | 0.7162 | 5.2550  | 1.48E-07 | 2.78E-06 |
| ENSBTAG00000007213 | 1607.1302  | 3.7564 | 0.8703 | 4.3162  | 1.59E-05 | 1.84E-04 |
| ENSBTAG00000003219 | 2618.6171  | 3.7522 | 0.4357 | 8.6126  | 7.14E-18 | 6.26E-16 |
| ENSBTAG00000047676 | 52.9694    | 3.7485 | 0.9473 | 3.9571  | 7.59E-05 | 7.18E-04 |
| ENSBTAG00000014898 | 90.3875    | 3.7480 | 0.8319 | 4.5054  | 6.63E-06 | 8.36E-05 |
| ENSBTAG00000013205 | 256.0784   | 3.7478 | 0.3994 | 9.3836  | 6.38E-21 | 8.95E-19 |
| ENSBTAG00000038326 | 5959.3974  | 3.7454 | 0.7171 | 5.2229  | 1.76E-07 | 3.26E-06 |
| ENSBTAG00000004037 | 5796.3380  | 3.7401 | 0.4543 | 8.2322  | 1.84E-16 | 1.35E-14 |
| ENSBTAG00000000995 | 1805.1193  | 3.7363 | 0.3727 | 10.0247 | 1.19E-23 | 2.19E-21 |
| ENSBTAG00000031851 | 274.6027   | 3.7301 | 0.7353 | 5.0729  | 3.92E-07 | 6.67E-06 |
| ENSBTAG00000022890 | 28.6922    | 3.7296 | 1.0458 | 3.5663  | 3.62E-04 | 2.76E-03 |
| ENSBTAG00000044027 | 30.4040    | 3.7251 | 1.1150 | 3.3408  | 8.35E-04 | 5.62E-03 |
| ENSBTAG00000036260 | 42.5291    | 3.7225 | 0.9338 | 3.9866  | 6.70E-05 | 6.47E-04 |
| ENSBTAG00000015952 | 23.7156    | 3.7202 | 1.0972 | 3.3905  | 6.98E-04 | 4.85E-03 |
| ENSBTAG00000031658 | 4295.0623  | 3.7191 | 0.7984 | 4.6582  | 3.19E-06 | 4.33E-05 |
| ENSBTAG00000015711 | 1296.6977  | 3.7166 | 0.5333 | 6.9697  | 3.18E-12 | 1.33E-10 |
| ENSBTAG00000009733 | 2346.9117  | 3.7151 | 0.5652 | 6.5731  | 4.93E-11 | 1.75E-09 |
| ENSBTAG00000013371 | 1654.4407  | 3.7129 | 0.7408 | 5.0120  | 5.39E-07 | 8.80E-06 |
| ENSBTAG00000043301 | 12.7591    | 3.7051 | 1.0930 | 3.3897  | 7.00E-04 | 4.86E-03 |
| ENSBTAG00000009354 | 63.5078    | 3.6984 | 0.8580 | 4.3103  | 1.63E-05 | 1.88E-04 |
| ENSBTAG00000029930 | 92.0097    | 3.6981 | 0.7415 | 4.9876  | 6.11E-07 | 9.89E-06 |
| ENSBTAG00000027713 | 3581.8098  | 3.6924 | 0.3468 | 10.6484 | 1.77E-26 | 3.92E-24 |
| ENSBTAG00000013187 | 35276.8595 | 3.6917 | 0.2800 | 13.1839 | 1.09E-39 | 5.05E-37 |
| ENSBTAG00000008283 | 51.0886    | 3.6903 | 1.0331 | 3.5719  | 3.54E-04 | 2.72E-03 |
| ENSBTAG00000019371 | 18.1157    | 3.6897 | 1.1576 | 3.1874  | 1.44E-03 | 8.68E-03 |
| ENSBTAG00000005504 | 154.1326   | 3.6868 | 0.5468 | 6.7427  | 1.55E-11 | 5.94E-10 |
| ENSBTAG00000004767 | 133.5929   | 3.6835 | 0.8178 | 4.5044  | 6.66E-06 | 8.38E-05 |
| ENSBTAG00000019545 | 29.7074    | 3.6820 | 1.0365 | 3.5524  | 3.82E-04 | 2.89E-03 |
| ENSBTAG00000017232 | 4712.5631  | 3.6792 | 0.3973 | 9.2610  | 2.03E-20 | 2.42E-18 |
| ENSBTAG00000009455 | 13.0012    | 3.6735 | 1.0830 | 3.3919  | 6.94E-04 | 4.82E-03 |
| ENSBTAG00000030593 | 24.2520    | 3.6713 | 1.0787 | 3.4034  | 6.65E-04 | 4.65E-03 |
| ENSBTAG00000021009 | 12.7931    | 3.6659 | 1.1036 | 3.3218  | 8.95E-04 | 5.92E-03 |
| ENSBTAG00000020620 | 47.6000    | 3.6569 | 0.9135 | 4.0030  | 6.25E-05 | 6.09E-04 |
| ENSBTAG00000010813 | 101.7256   | 3.6528 | 0.4864 | 7.5096  | 5.93E-14 | 3.17E-12 |
| ENSBTAG00000009215 | 45.5106    | 3.6525 | 1.0645 | 3.4313  | 6.01E-04 | 4.27E-03 |

|                    |           |        |        |        |          |          |
|--------------------|-----------|--------|--------|--------|----------|----------|
| ENSBTAG00000019779 | 47.6257   | 3.6522 | 0.6599 | 5.5345 | 3.12E-08 | 6.49E-07 |
| ENSBTAG00000012082 | 183.0709  | 3.6516 | 0.9030 | 4.0440 | 5.26E-05 | 5.21E-04 |
| ENSBTAG00000013165 | 153.5095  | 3.6515 | 0.9194 | 3.9716 | 7.14E-05 | 6.84E-04 |
| ENSBTAG00000013664 | 297.5152  | 3.6505 | 0.6490 | 5.6252 | 1.85E-08 | 4.05E-07 |
| ENSBTAG00000009214 | 309.4067  | 3.6443 | 0.7504 | 4.8566 | 1.19E-06 | 1.82E-05 |
| ENSBTAG00000030974 | 124.5432  | 3.6433 | 1.0023 | 3.6348 | 2.78E-04 | 2.21E-03 |
| ENSBTAG00000022715 | 26.5796   | 3.6409 | 1.0481 | 3.4739 | 5.13E-04 | 3.73E-03 |
| ENSBTAG00000011316 | 569.1984  | 3.6383 | 0.5979 | 6.0849 | 1.17E-09 | 3.18E-08 |
| ENSBTAG00000033107 | 140.7893  | 3.6354 | 0.8682 | 4.1870 | 2.83E-05 | 3.04E-04 |
| ENSBTAG00000008329 | 153.3538  | 3.6345 | 0.9079 | 4.0033 | 6.25E-05 | 6.09E-04 |
| ENSBTAG00000027020 | 426.6868  | 3.6338 | 0.9401 | 3.8654 | 1.11E-04 | 1.01E-03 |
| ENSBTAG00000029828 | 52.9041   | 3.6290 | 0.9844 | 3.6864 | 2.27E-04 | 1.87E-03 |
| ENSBTAG00000003880 | 939.9037  | 3.6280 | 0.6128 | 5.9206 | 3.21E-09 | 8.09E-08 |
| ENSBTAG00000018531 | 214.6998  | 3.6269 | 0.8520 | 4.2572 | 2.07E-05 | 2.31E-04 |
| ENSBTAG00000010408 | 1196.2184 | 3.6248 | 0.4204 | 8.6219 | 6.58E-18 | 5.92E-16 |
| ENSBTAG00000010820 | 312.0541  | 3.6243 | 0.8149 | 4.4474 | 8.69E-06 | 1.07E-04 |
| ENSBTAG00000048249 | 78.5832   | 3.6219 | 1.0926 | 3.3149 | 9.17E-04 | 6.03E-03 |
| ENSBTAG00000006125 | 312.3905  | 3.6212 | 0.7464 | 4.8513 | 1.23E-06 | 1.86E-05 |
| ENSBTAG00000010987 | 1060.0956 | 3.6169 | 0.7579 | 4.7721 | 1.82E-06 | 2.61E-05 |
| ENSBTAG00000001042 | 471.8177  | 3.6122 | 0.7095 | 5.0914 | 3.55E-07 | 6.08E-06 |
| ENSBTAG00000005055 | 12.5776   | 3.6094 | 1.1133 | 3.2420 | 1.19E-03 | 7.44E-03 |
| ENSBTAG00000017060 | 516.8318  | 3.6088 | 0.7516 | 4.8013 | 1.58E-06 | 2.31E-05 |
| ENSBTAG00000020773 | 68.6677   | 3.6080 | 0.6666 | 5.4126 | 6.21E-08 | 1.23E-06 |
| ENSBTAG00000011740 | 256.7082  | 3.6053 | 0.7088 | 5.0863 | 3.65E-07 | 6.22E-06 |
| ENSBTAG00000005615 | 32.4967   | 3.5997 | 1.0384 | 3.4665 | 5.27E-04 | 3.83E-03 |
| ENSBTAG00000007917 | 1287.9101 | 3.5936 | 0.6030 | 5.9592 | 2.53E-09 | 6.52E-08 |
| ENSBTAG00000020394 | 37.6415   | 3.5908 | 0.9061 | 3.9627 | 7.41E-05 | 7.05E-04 |
| ENSBTAG00000005244 | 416.2687  | 3.5824 | 0.7505 | 4.7736 | 1.81E-06 | 2.60E-05 |
| ENSBTAG00000011914 | 1427.6753 | 3.5718 | 0.6726 | 5.3106 | 1.09E-07 | 2.09E-06 |
| ENSBTAG00000006921 | 26.8153   | 3.5687 | 1.0557 | 3.3805 | 7.23E-04 | 5.00E-03 |
| ENSBTAG00000031993 | 752.1645  | 3.5638 | 0.3836 | 9.2897 | 1.55E-20 | 1.95E-18 |
| ENSBTAG00000006223 | 90.7374   | 3.5633 | 0.7394 | 4.8193 | 1.44E-06 | 2.13E-05 |
| ENSBTAG00000011600 | 387.6995  | 3.5617 | 0.7342 | 4.8510 | 1.23E-06 | 1.86E-05 |
| ENSBTAG00000047600 | 11.2571   | 3.5583 | 1.1009 | 3.2322 | 1.23E-03 | 7.66E-03 |
| ENSBTAG00000031287 | 76.7095   | 3.5571 | 0.8631 | 4.1215 | 3.76E-05 | 3.90E-04 |
| ENSBTAG00000007661 | 361.6172  | 3.5557 | 0.8118 | 4.3802 | 1.19E-05 | 1.41E-04 |
| ENSBTAG00000001927 | 1294.5163 | 3.5527 | 0.6869 | 5.1722 | 2.31E-07 | 4.18E-06 |
| ENSBTAG00000034349 | 45.2253   | 3.5518 | 0.9664 | 3.6755 | 2.37E-04 | 1.94E-03 |
| ENSBTAG00000006998 | 142.0297  | 3.5511 | 1.0625 | 3.3422 | 8.31E-04 | 5.60E-03 |
| ENSBTAG00000012815 | 102.2867  | 3.5492 | 1.0060 | 3.5280 | 4.19E-04 | 3.13E-03 |
| ENSBTAG00000008556 | 31.7508   | 3.5466 | 1.0792 | 3.2864 | 1.01E-03 | 6.54E-03 |
| ENSBTAG00000038337 | 21.5223   | 3.5452 | 1.1170 | 3.1738 | 1.50E-03 | 9.03E-03 |
| ENSBTAG00000019470 | 160.4027  | 3.5367 | 0.8400 | 4.2106 | 2.55E-05 | 2.77E-04 |

|                    |            |        |        |         |          |          |
|--------------------|------------|--------|--------|---------|----------|----------|
| ENSBTAG00000008099 | 12.2877    | 3.5333 | 1.1259 | 3.1382  | 1.70E-03 | 9.98E-03 |
| ENSBTAG00000010882 | 1016.7808  | 3.5323 | 0.5006 | 7.0565  | 1.71E-12 | 7.50E-11 |
| ENSBTAG00000015708 | 47.5730    | 3.5322 | 0.9831 | 3.5931  | 3.27E-04 | 2.53E-03 |
| ENSBTAG00000018270 | 12.8105    | 3.5258 | 1.1140 | 3.1649  | 1.55E-03 | 9.25E-03 |
| ENSBTAG00000006208 | 186.2942   | 3.5239 | 1.0052 | 3.5058  | 4.55E-04 | 3.38E-03 |
| ENSBTAG00000026944 | 28.5275    | 3.5052 | 1.0201 | 3.4359  | 5.91E-04 | 4.22E-03 |
| ENSBTAG00000003489 | 19.8805    | 3.5020 | 1.0712 | 3.2692  | 1.08E-03 | 6.89E-03 |
| ENSBTAG00000015978 | 1214.7347  | 3.4950 | 0.6008 | 5.8169  | 5.99E-09 | 1.43E-07 |
| ENSBTAG00000001879 | 28.7250    | 3.4934 | 0.8473 | 4.1230  | 3.74E-05 | 3.88E-04 |
| ENSBTAG00000006676 | 5845.1703  | 3.4932 | 0.8158 | 4.2822  | 1.85E-05 | 2.09E-04 |
| ENSBTAG00000034985 | 941.7837   | 3.4604 | 0.7938 | 4.3594  | 1.30E-05 | 1.55E-04 |
| ENSBTAG00000047605 | 64.4927    | 3.4602 | 1.0531 | 3.2859  | 1.02E-03 | 6.55E-03 |
| ENSBTAG00000007447 | 3423.0517  | 3.4579 | 0.2396 | 14.4317 | 3.27E-47 | 2.94E-44 |
| ENSBTAG00000013860 | 935.1382   | 3.4546 | 0.6737 | 5.1277  | 2.93E-07 | 5.16E-06 |
| ENSBTAG00000016857 | 25.9127    | 3.4518 | 1.0450 | 3.3031  | 9.56E-04 | 6.24E-03 |
| ENSBTAG00000001585 | 364.9243   | 3.4498 | 0.7103 | 4.8571  | 1.19E-06 | 1.82E-05 |
| ENSBTAG00000009639 | 632.5147   | 3.4492 | 0.5067 | 6.8078  | 9.91E-12 | 3.91E-10 |
| ENSBTAG00000038235 | 18.0376    | 3.4376 | 1.0819 | 3.1775  | 1.49E-03 | 8.92E-03 |
| ENSBTAG00000001009 | 381.7169   | 3.4333 | 0.8153 | 4.2110  | 2.54E-05 | 2.77E-04 |
| ENSBTAG00000016683 | 4101.8910  | 3.4281 | 0.6030 | 5.6854  | 1.31E-08 | 2.92E-07 |
| ENSBTAG00000000185 | 244.2091   | 3.4261 | 0.9392 | 3.6477  | 2.65E-04 | 2.12E-03 |
| ENSBTAG00000047939 | 264.7179   | 3.4224 | 0.6186 | 5.5323  | 3.16E-08 | 6.57E-07 |
| ENSBTAG00000013881 | 132.0613   | 3.4128 | 0.9008 | 3.7886  | 1.51E-04 | 1.32E-03 |
| ENSBTAG00000011960 | 19871.0095 | 3.4083 | 0.5052 | 6.7467  | 1.51E-11 | 5.79E-10 |
| ENSBTAG00000019293 | 34.5205    | 3.4063 | 1.0339 | 3.2947  | 9.85E-04 | 6.40E-03 |
| ENSBTAG00000034295 | 56.1638    | 3.3927 | 0.9763 | 3.4751  | 5.11E-04 | 3.72E-03 |
| ENSBTAG00000019686 | 201.6724   | 3.3841 | 0.7088 | 4.7742  | 1.80E-06 | 2.60E-05 |
| ENSBTAG00000018137 | 459.2744   | 3.3824 | 0.7974 | 4.2416  | 2.22E-05 | 2.46E-04 |
| ENSBTAG00000002629 | 127.4895   | 3.3797 | 0.7229 | 4.6754  | 2.93E-06 | 4.03E-05 |
| ENSBTAG00000020884 | 780.5113   | 3.3763 | 0.7402 | 4.5613  | 5.08E-06 | 6.57E-05 |
| ENSBTAG00000001775 | 20.5618    | 3.3740 | 1.0246 | 3.2930  | 9.91E-04 | 6.43E-03 |
| ENSBTAG00000030845 | 490.3007   | 3.3732 | 0.7604 | 4.4359  | 9.17E-06 | 1.12E-04 |
| ENSBTAG00000010244 | 41.4001    | 3.3720 | 0.9238 | 3.6500  | 2.62E-04 | 2.10E-03 |
| ENSBTAG00000019947 | 2808.9926  | 3.3421 | 0.8050 | 4.1516  | 3.30E-05 | 3.49E-04 |
| ENSBTAG00000014628 | 20.8875    | 3.3366 | 1.0436 | 3.1972  | 1.39E-03 | 8.49E-03 |
| ENSBTAG00000015821 | 40.6129    | 3.3302 | 0.8645 | 3.8521  | 1.17E-04 | 1.05E-03 |
| ENSBTAG00000014857 | 63.2777    | 3.3267 | 1.0446 | 3.1845  | 1.45E-03 | 8.75E-03 |
| ENSBTAG00000002215 | 3554.3251  | 3.3218 | 0.8435 | 3.9379  | 8.22E-05 | 7.70E-04 |
| ENSBTAG00000046924 | 127.9387   | 3.3164 | 0.7760 | 4.2735  | 1.92E-05 | 2.16E-04 |
| ENSBTAG00000033727 | 92.4380    | 3.3068 | 0.7951 | 4.1591  | 3.20E-05 | 3.39E-04 |
| ENSBTAG00000021474 | 41.0548    | 3.3053 | 0.9973 | 3.3142  | 9.19E-04 | 6.04E-03 |
| ENSBTAG00000015228 | 3759.7133  | 3.3038 | 0.7716 | 4.2819  | 1.85E-05 | 2.09E-04 |
| ENSBTAG00000013204 | 20010.6344 | 3.2921 | 0.5604 | 5.8743  | 4.25E-09 | 1.04E-07 |

|                    |            |        |        |         |          |          |
|--------------------|------------|--------|--------|---------|----------|----------|
| ENSBTAG00000031430 | 502.6243   | 3.2849 | 0.8288 | 3.9635  | 7.39E-05 | 7.03E-04 |
| ENSBTAG00000017527 | 76.4183    | 3.2816 | 0.8107 | 4.0479  | 5.17E-05 | 5.14E-04 |
| ENSBTAG00000020592 | 74.5230    | 3.2778 | 0.9829 | 3.3350  | 8.53E-04 | 5.70E-03 |
| ENSBTAG00000004104 | 52.8175    | 3.2748 | 0.9204 | 3.5578  | 3.74E-04 | 2.84E-03 |
| ENSBTAG00000013103 | 5590.7178  | 3.2712 | 0.7272 | 4.4986  | 6.84E-06 | 8.60E-05 |
| ENSBTAG00000046307 | 9415.6654  | 3.2704 | 0.2892 | 11.3087 | 1.19E-29 | 3.08E-27 |
| ENSBTAG00000007116 | 6947.1953  | 3.2702 | 0.6375 | 5.1299  | 2.90E-07 | 5.11E-06 |
| ENSBTAG00000021430 | 30.0068    | 3.2693 | 0.9308 | 3.5123  | 4.44E-04 | 3.30E-03 |
| ENSBTAG00000021144 | 119.3592   | 3.2681 | 0.7592 | 4.3046  | 1.67E-05 | 1.93E-04 |
| ENSBTAG00000000109 | 25.9193    | 3.2669 | 0.7731 | 4.2256  | 2.38E-05 | 2.61E-04 |
| ENSBTAG00000006578 | 32.5263    | 3.2654 | 0.9659 | 3.3806  | 7.23E-04 | 5.00E-03 |
| ENSBTAG00000045767 | 96.7597    | 3.2344 | 0.8683 | 3.7251  | 1.95E-04 | 1.64E-03 |
| ENSBTAG00000012774 | 39.4305    | 3.2338 | 0.9518 | 3.3977  | 6.80E-04 | 4.74E-03 |
| ENSBTAG00000014270 | 43.3335    | 3.2321 | 1.0072 | 3.2089  | 1.33E-03 | 8.22E-03 |
| ENSBTAG00000004636 | 2853.3852  | 3.2223 | 0.2674 | 12.0515 | 1.90E-33 | 6.11E-31 |
| ENSBTAG00000011421 | 191.7185   | 3.2160 | 0.6634 | 4.8478  | 1.25E-06 | 1.88E-05 |
| ENSBTAG00000014806 | 141.7218   | 3.2131 | 0.8447 | 3.8039  | 1.42E-04 | 1.26E-03 |
| ENSBTAG00000018011 | 96.1160    | 3.2113 | 0.7662 | 4.1913  | 2.77E-05 | 3.00E-04 |
| ENSBTAG00000013984 | 20.7560    | 3.2113 | 0.9902 | 3.2430  | 1.18E-03 | 7.42E-03 |
| ENSBTAG00000044856 | 20.0232    | 3.2106 | 0.9697 | 3.3108  | 9.30E-04 | 6.12E-03 |
| ENSBTAG00000008507 | 42.9146    | 3.2091 | 0.8991 | 3.5692  | 3.58E-04 | 2.74E-03 |
| ENSBTAG00000046981 | 216.8090   | 3.2037 | 0.7145 | 4.4840  | 7.32E-06 | 9.15E-05 |
| ENSBTAG00000008182 | 132.9640   | 3.2031 | 0.4820 | 6.6450  | 3.03E-11 | 1.11E-09 |
| ENSBTAG00000008462 | 45.0512    | 3.2017 | 0.9393 | 3.4087  | 6.53E-04 | 4.58E-03 |
| ENSBTAG00000047879 | 16.3702    | 3.2005 | 0.9640 | 3.3202  | 9.00E-04 | 5.94E-03 |
| ENSBTAG00000014912 | 4331.7913  | 3.1953 | 0.7852 | 4.0693  | 4.72E-05 | 4.73E-04 |
| ENSBTAG00000012451 | 186.3283   | 3.1942 | 0.8367 | 3.8178  | 1.35E-04 | 1.19E-03 |
| ENSBTAG00000010943 | 2975.9144  | 3.1941 | 0.3253 | 9.8198  | 9.25E-23 | 1.60E-20 |
| ENSBTAG00000006579 | 268.3175   | 3.1861 | 0.8877 | 3.5893  | 3.32E-04 | 2.56E-03 |
| ENSBTAG00000017797 | 40.9124    | 3.1834 | 1.0130 | 3.1426  | 1.67E-03 | 9.87E-03 |
| ENSBTAG00000016354 | 1117.6477  | 3.1754 | 0.5543 | 5.7283  | 1.01E-08 | 2.33E-07 |
| ENSBTAG00000013401 | 1584.0769  | 3.1718 | 0.3799 | 8.3498  | 6.84E-17 | 5.39E-15 |
| ENSBTAG00000019903 | 108.6073   | 3.1708 | 0.9935 | 3.1915  | 1.42E-03 | 8.59E-03 |
| ENSBTAG00000009355 | 457.5655   | 3.1676 | 0.6613 | 4.7903  | 1.67E-06 | 2.43E-05 |
| ENSBTAG00000002416 | 69.6974    | 3.1645 | 0.9617 | 3.2904  | 1.00E-03 | 6.47E-03 |
| ENSBTAG00000002615 | 193.2870   | 3.1639 | 0.5056 | 6.2571  | 3.92E-10 | 1.18E-08 |
| ENSBTAG00000011343 | 64.0164    | 3.1625 | 0.7361 | 4.2965  | 1.73E-05 | 1.98E-04 |
| ENSBTAG00000007176 | 433.5937   | 3.1581 | 0.5266 | 5.9972  | 2.01E-09 | 5.28E-08 |
| ENSBTAG00000040512 | 128.9096   | 3.1560 | 0.8509 | 3.7089  | 2.08E-04 | 1.73E-03 |
| ENSBTAG00000002593 | 72.4071    | 3.1527 | 0.5781 | 5.4532  | 4.95E-08 | 9.94E-07 |
| ENSBTAG00000015666 | 236.5518   | 3.1511 | 0.3810 | 8.2716  | 1.32E-16 | 1.01E-14 |
| ENSBTAG00000009172 | 28410.2637 | 3.1500 | 0.5841 | 5.3930  | 6.93E-08 | 1.37E-06 |
| ENSBTAG00000032084 | 188.1399   | 3.1483 | 0.4730 | 6.6564  | 2.81E-11 | 1.03E-09 |

|                    |           |        |        |        |          |          |
|--------------------|-----------|--------|--------|--------|----------|----------|
| ENSBTAG00000024503 | 836.2579  | 3.1378 | 0.7883 | 3.9806 | 6.88E-05 | 6.62E-04 |
| ENSBTAG00000039922 | 25.0476   | 3.1368 | 0.9739 | 3.2208 | 1.28E-03 | 7.92E-03 |
| ENSBTAG00000016116 | 197.3992  | 3.1271 | 0.7001 | 4.4666 | 7.95E-06 | 9.85E-05 |
| ENSBTAG00000016399 | 819.7429  | 3.1268 | 0.5063 | 6.1753 | 6.60E-10 | 1.89E-08 |
| ENSBTAG00000003054 | 204.4681  | 3.1057 | 0.6384 | 4.8647 | 1.15E-06 | 1.76E-05 |
| ENSBTAG00000019967 | 281.0627  | 3.1052 | 0.8756 | 3.5462 | 3.91E-04 | 2.95E-03 |
| ENSBTAG00000047880 | 2552.3056 | 3.1002 | 0.8519 | 3.6394 | 2.73E-04 | 2.18E-03 |
| ENSBTAG00000040244 | 139.1262  | 3.0979 | 0.9010 | 3.4381 | 5.86E-04 | 4.20E-03 |
| ENSBTAG00000046763 | 7485.8598 | 3.0975 | 0.5968 | 5.1904 | 2.10E-07 | 3.80E-06 |
| ENSBTAG00000015742 | 424.6134  | 3.0963 | 0.6730 | 4.6009 | 4.21E-06 | 5.55E-05 |
| ENSBTAG00000009256 | 1090.0591 | 3.0958 | 0.5803 | 5.3348 | 9.56E-08 | 1.86E-06 |
| ENSBTAG00000009845 | 3518.5512 | 3.0935 | 0.4344 | 7.1218 | 1.07E-12 | 4.76E-11 |
| ENSBTAG00000001081 | 2227.8793 | 3.0909 | 0.3494 | 8.8476 | 8.94E-19 | 8.74E-17 |
| ENSBTAG00000039067 | 47.6863   | 3.0898 | 0.9259 | 3.3371 | 8.47E-04 | 5.68E-03 |
| ENSBTAG00000012779 | 91.0009   | 3.0893 | 0.8360 | 3.6952 | 2.20E-04 | 1.82E-03 |
| ENSBTAG00000006792 | 130.3064  | 3.0866 | 0.7892 | 3.9111 | 9.19E-05 | 8.51E-04 |
| ENSBTAG00000003016 | 39.9470   | 3.0862 | 0.8529 | 3.6187 | 2.96E-04 | 2.32E-03 |
| ENSBTAG00000001465 | 22.2921   | 3.0855 | 0.9243 | 3.3384 | 8.43E-04 | 5.66E-03 |
| ENSBTAG00000012444 | 465.1361  | 3.0754 | 0.6151 | 4.9996 | 5.74E-07 | 9.33E-06 |
| ENSBTAG00000015337 | 75.7758   | 3.0749 | 0.8707 | 3.5316 | 4.13E-04 | 3.10E-03 |
| ENSBTAG00000007450 | 142.8462  | 3.0730 | 0.6713 | 4.5778 | 4.70E-06 | 6.13E-05 |
| ENSBTAG00000007338 | 197.8187  | 3.0705 | 0.9555 | 3.2135 | 1.31E-03 | 8.10E-03 |
| ENSBTAG00000000720 | 110.8743  | 3.0634 | 0.5173 | 5.9219 | 3.18E-09 | 8.05E-08 |
| ENSBTAG00000008154 | 196.6277  | 3.0608 | 0.7217 | 4.2412 | 2.22E-05 | 2.46E-04 |
| ENSBTAG00000038428 | 725.4953  | 3.0527 | 0.4116 | 7.4172 | 1.20E-13 | 6.13E-12 |
| ENSBTAG00000003727 | 547.4684  | 3.0468 | 0.5735 | 5.3124 | 1.08E-07 | 2.08E-06 |
| ENSBTAG00000002624 | 506.4162  | 3.0441 | 0.6821 | 4.4629 | 8.09E-06 | 1.00E-04 |
| ENSBTAG00000013166 | 1358.7153 | 3.0377 | 0.5307 | 5.7240 | 1.04E-08 | 2.38E-07 |
| ENSBTAG00000046314 | 1037.6795 | 3.0306 | 0.5304 | 5.7135 | 1.11E-08 | 2.52E-07 |
| ENSBTAG00000039335 | 79.1746   | 3.0237 | 0.8314 | 3.6367 | 2.76E-04 | 2.19E-03 |
| ENSBTAG00000020772 | 197.5829  | 3.0209 | 0.8625 | 3.5026 | 4.61E-04 | 3.40E-03 |
| ENSBTAG00000003721 | 41.9244   | 3.0198 | 0.7914 | 3.8160 | 1.36E-04 | 1.20E-03 |
| ENSBTAG00000001662 | 933.8721  | 3.0195 | 0.4908 | 6.1523 | 7.64E-10 | 2.15E-08 |
| ENSBTAG00000024715 | 121.3413  | 3.0180 | 0.7827 | 3.8559 | 1.15E-04 | 1.04E-03 |
| ENSBTAG00000006984 | 421.5356  | 3.0164 | 0.6852 | 4.4024 | 1.07E-05 | 1.29E-04 |
| ENSBTAG00000004189 | 1409.3925 | 3.0035 | 0.3900 | 7.7008 | 1.35E-14 | 7.79E-13 |
| ENSBTAG00000040361 | 140.5811  | 2.9991 | 0.9556 | 3.1385 | 1.70E-03 | 9.98E-03 |
| ENSBTAG00000007763 | 650.3078  | 2.9974 | 0.5271 | 5.6870 | 1.29E-08 | 2.90E-07 |
| ENSBTAG00000000144 | 28.4155   | 2.9968 | 0.8639 | 3.4690 | 5.22E-04 | 3.80E-03 |
| ENSBTAG00000011007 | 460.1235  | 2.9935 | 0.5452 | 5.4909 | 4.00E-08 | 8.15E-07 |
| ENSBTAG00000011640 | 9660.9268 | 2.9904 | 0.3654 | 8.1851 | 2.72E-16 | 1.97E-14 |
| ENSBTAG00000016315 | 1625.7506 | 2.9772 | 0.6102 | 4.8787 | 1.07E-06 | 1.65E-05 |
| ENSBTAG00000045862 | 76.9514   | 2.9769 | 0.7964 | 3.7378 | 1.86E-04 | 1.57E-03 |

|                    |            |        |        |         |          |          |
|--------------------|------------|--------|--------|---------|----------|----------|
| ENSBTAG00000022622 | 192.1988   | 2.9760 | 0.4114 | 7.2337  | 4.70E-13 | 2.25E-11 |
| ENSBTAG00000005978 | 123.8618   | 2.9747 | 0.8356 | 3.5601  | 3.71E-04 | 2.82E-03 |
| ENSBTAG00000020578 | 523.1109   | 2.9741 | 0.5329 | 5.5816  | 2.38E-08 | 5.06E-07 |
| ENSBTAG00000009343 | 1298.6493  | 2.9734 | 0.2888 | 10.2953 | 7.40E-25 | 1.45E-22 |
| ENSBTAG00000019988 | 46.4210    | 2.9667 | 0.8805 | 3.3693  | 7.54E-04 | 5.18E-03 |
| ENSBTAG00000036367 | 49.8833    | 2.9665 | 0.8599 | 3.4498  | 5.61E-04 | 4.04E-03 |
| ENSBTAG00000020294 | 465.7080   | 2.9639 | 0.9382 | 3.1592  | 1.58E-03 | 9.40E-03 |
| ENSBTAG00000030999 | 429.3746   | 2.9621 | 0.3554 | 8.3336  | 7.84E-17 | 6.15E-15 |
| ENSBTAG00000008612 | 30.3544    | 2.9611 | 0.8804 | 3.3632  | 7.71E-04 | 5.28E-03 |
| ENSBTAG00000016963 | 30.3153    | 2.9498 | 0.7869 | 3.7486  | 1.78E-04 | 1.52E-03 |
| ENSBTAG00000009772 | 622.0885   | 2.9399 | 0.3197 | 9.1955  | 3.73E-20 | 4.38E-18 |
| ENSBTAG00000024928 | 602.3739   | 2.9281 | 0.6016 | 4.8668  | 1.13E-06 | 1.75E-05 |
| ENSBTAG00000001602 | 35700.6767 | 2.9278 | 0.3158 | 9.2697  | 1.87E-20 | 2.29E-18 |
| ENSBTAG00000003711 | 935.6162   | 2.9252 | 0.9131 | 3.2035  | 1.36E-03 | 8.35E-03 |
| ENSBTAG00000003892 | 207.8539   | 2.9231 | 0.5779 | 5.0578  | 4.24E-07 | 7.14E-06 |
| ENSBTAG00000010334 | 24.5806    | 2.9222 | 0.8698 | 3.3598  | 7.80E-04 | 5.34E-03 |
| ENSBTAG00000012823 | 174.9867   | 2.9136 | 0.6188 | 4.7083  | 2.50E-06 | 3.47E-05 |
| ENSBTAG00000008690 | 72.8032    | 2.9112 | 0.8993 | 3.2373  | 1.21E-03 | 7.55E-03 |
| ENSBTAG00000020661 | 73.7776    | 2.9047 | 0.8145 | 3.5663  | 3.62E-04 | 2.76E-03 |
| ENSBTAG00000039151 | 23.1227    | 2.9023 | 0.8662 | 3.3507  | 8.06E-04 | 5.47E-03 |
| ENSBTAG00000016411 | 1240.9844  | 2.8983 | 0.6102 | 4.7498  | 2.04E-06 | 2.89E-05 |
| ENSBTAG00000008953 | 7348.3702  | 2.8963 | 0.2706 | 10.7025 | 9.91E-27 | 2.30E-24 |
| ENSBTAG00000047822 | 783.2219   | 2.8907 | 0.3930 | 7.3559  | 1.90E-13 | 9.37E-12 |
| ENSBTAG00000008573 | 3183.0775  | 2.8894 | 0.5187 | 5.5699  | 2.55E-08 | 5.35E-07 |
| ENSBTAG00000013496 | 177.8908   | 2.8881 | 0.9020 | 3.2019  | 1.37E-03 | 8.38E-03 |
| ENSBTAG00000001826 | 178.4998   | 2.8837 | 0.6976 | 4.1339  | 3.57E-05 | 3.72E-04 |
| ENSBTAG00000002129 | 44.3921    | 2.8819 | 0.7853 | 3.6697  | 2.43E-04 | 1.97E-03 |
| ENSBTAG00000010992 | 585.3844   | 2.8784 | 0.8133 | 3.5391  | 4.02E-04 | 3.02E-03 |
| ENSBTAG00000008886 | 63.1999    | 2.8755 | 0.7830 | 3.6726  | 2.40E-04 | 1.95E-03 |
| ENSBTAG00000023907 | 1851.7257  | 2.8732 | 0.7153 | 4.0165  | 5.91E-05 | 5.80E-04 |
| ENSBTAG00000033345 | 6893.5307  | 2.8662 | 0.7473 | 3.8353  | 1.25E-04 | 1.12E-03 |
| ENSBTAG00000046054 | 44082.4066 | 2.8655 | 0.3282 | 8.7318  | 2.51E-18 | 2.31E-16 |
| ENSBTAG00000003301 | 67.0954    | 2.8654 | 0.5418 | 5.2891  | 1.23E-07 | 2.33E-06 |
| ENSBTAG00000012278 | 1126.4949  | 2.8633 | 0.2767 | 10.3470 | 4.32E-25 | 8.89E-23 |
| ENSBTAG00000046862 | 2305.1221  | 2.8599 | 0.5771 | 4.9559  | 7.20E-07 | 1.14E-05 |
| ENSBTAG00000004423 | 871.1363   | 2.8573 | 0.4590 | 6.2246  | 4.83E-10 | 1.41E-08 |
| ENSBTAG00000046155 | 35712.4352 | 2.8548 | 0.5117 | 5.5788  | 2.42E-08 | 5.12E-07 |
| ENSBTAG00000030932 | 66.3386    | 2.8483 | 0.8772 | 3.2469  | 1.17E-03 | 7.34E-03 |
| ENSBTAG00000009942 | 4946.9475  | 2.8475 | 0.3778 | 7.5366  | 4.82E-14 | 2.60E-12 |
| ENSBTAG00000004641 | 1211.4609  | 2.8369 | 0.3830 | 7.4063  | 1.30E-13 | 6.61E-12 |
| ENSBTAG00000018691 | 70.9633    | 2.8271 | 0.8399 | 3.3661  | 7.62E-04 | 5.24E-03 |
| ENSBTAG00000004662 | 1268.1307  | 2.8180 | 0.5368 | 5.2496  | 1.52E-07 | 2.86E-06 |
| ENSBTAG00000005154 | 214.5775   | 2.8141 | 0.4802 | 5.8598  | 4.63E-09 | 1.13E-07 |

|                    |            |        |        |         |          |          |
|--------------------|------------|--------|--------|---------|----------|----------|
| ENSBTAG00000008103 | 910.0460   | 2.8137 | 0.7113 | 3.9557  | 7.63E-05 | 7.20E-04 |
| ENSBTAG00000026461 | 4802.1837  | 2.8135 | 0.2146 | 13.1128 | 2.78E-39 | 1.21E-36 |
| ENSBTAG00000004777 | 304.3161   | 2.8076 | 0.8248 | 3.4038  | 6.65E-04 | 4.65E-03 |
| ENSBTAG00000010913 | 180.8343   | 2.8010 | 0.6465 | 4.3328  | 1.47E-05 | 1.71E-04 |
| ENSBTAG00000018119 | 71.3050    | 2.7998 | 0.8743 | 3.2024  | 1.36E-03 | 8.37E-03 |
| ENSBTAG00000005668 | 24150.8023 | 2.7990 | 0.5910 | 4.7358  | 2.18E-06 | 3.07E-05 |
| ENSBTAG00000046014 | 148.0230   | 2.7968 | 0.8398 | 3.3302  | 8.68E-04 | 5.78E-03 |
| ENSBTAG00000013029 | 643.7374   | 2.7961 | 0.4162 | 6.7182  | 1.84E-11 | 6.93E-10 |
| ENSBTAG00000011581 | 113.2325   | 2.7937 | 0.7878 | 3.5462  | 3.91E-04 | 2.95E-03 |
| ENSBTAG00000001156 | 1189.5094  | 2.7855 | 0.4057 | 6.8652  | 6.64E-12 | 2.68E-10 |
| ENSBTAG00000007485 | 621.0263   | 2.7850 | 0.5605 | 4.9687  | 6.74E-07 | 1.07E-05 |
| ENSBTAG00000024918 | 1820.9341  | 2.7806 | 0.7645 | 3.6373  | 2.76E-04 | 2.19E-03 |
| ENSBTAG00000017306 | 157.3633   | 2.7786 | 0.7335 | 3.7883  | 1.52E-04 | 1.32E-03 |
| ENSBTAG00000006139 | 668.0300   | 2.7784 | 0.4971 | 5.5891  | 2.28E-08 | 4.88E-07 |
| ENSBTAG00000015913 | 12647.3024 | 2.7772 | 0.3314 | 8.3811  | 5.24E-17 | 4.26E-15 |
| ENSBTAG00000003060 | 17099.3485 | 2.7747 | 0.3487 | 7.9571  | 1.76E-15 | 1.18E-13 |
| ENSBTAG00000020457 | 156.8908   | 2.7746 | 0.8340 | 3.3267  | 8.79E-04 | 5.84E-03 |
| ENSBTAG00000039731 | 266.9642   | 2.7743 | 0.7717 | 3.5949  | 3.25E-04 | 2.52E-03 |
| ENSBTAG00000000163 | 37441.7714 | 2.7690 | 0.5261 | 5.2634  | 1.41E-07 | 2.67E-06 |
| ENSBTAG00000020173 | 186.3202   | 2.7640 | 0.8459 | 3.2675  | 1.08E-03 | 6.91E-03 |
| ENSBTAG00000017763 | 2247.6335  | 2.7630 | 0.3848 | 7.1796  | 6.99E-13 | 3.22E-11 |
| ENSBTAG00000002758 | 70.6803    | 2.7562 | 0.8346 | 3.3022  | 9.59E-04 | 6.26E-03 |
| ENSBTAG00000045588 | 3949.8034  | 2.7528 | 0.8348 | 3.2973  | 9.76E-04 | 6.35E-03 |
| ENSBTAG00000013505 | 99.4924    | 2.7523 | 0.6471 | 4.2535  | 2.10E-05 | 2.35E-04 |
| ENSBTAG00000003836 | 456.1461   | 2.7509 | 0.6675 | 4.1209  | 3.77E-05 | 3.90E-04 |
| ENSBTAG00000005589 | 2158.9638  | 2.7453 | 0.7145 | 3.8423  | 1.22E-04 | 1.09E-03 |
| ENSBTAG00000045685 | 26.0353    | 2.7441 | 0.7565 | 3.6273  | 2.86E-04 | 2.26E-03 |
| ENSBTAG00000008441 | 807.6836   | 2.7425 | 0.4776 | 5.7421  | 9.35E-09 | 2.17E-07 |
| ENSBTAG00000015386 | 33.4634    | 2.7364 | 0.8519 | 3.2122  | 1.32E-03 | 8.14E-03 |
| ENSBTAG00000030334 | 73.9195    | 2.7326 | 0.8514 | 3.2094  | 1.33E-03 | 8.21E-03 |
| ENSBTAG00000001801 | 9720.1364  | 2.7316 | 0.5237 | 5.2164  | 1.82E-07 | 3.36E-06 |
| ENSBTAG00000004273 | 34.3873    | 2.7315 | 0.8065 | 3.3869  | 7.07E-04 | 4.90E-03 |
| ENSBTAG00000001143 | 353.7619   | 2.7279 | 0.7343 | 3.7153  | 2.03E-04 | 1.70E-03 |
| ENSBTAG00000004010 | 5303.6465  | 2.7252 | 0.7003 | 3.8915  | 9.96E-05 | 9.16E-04 |
| ENSBTAG00000039049 | 41.1595    | 2.7242 | 0.7431 | 3.6660  | 2.46E-04 | 2.00E-03 |
| ENSBTAG00000007378 | 171.3355   | 2.7180 | 0.8571 | 3.1712  | 1.52E-03 | 9.09E-03 |
| ENSBTAG00000009257 | 48.4241    | 2.7144 | 0.8599 | 3.1566  | 1.60E-03 | 9.47E-03 |
| ENSBTAG00000012343 | 2291.0825  | 2.7132 | 0.2321 | 11.6888 | 1.45E-31 | 4.17E-29 |
| ENSBTAG00000026919 | 268.8903   | 2.7113 | 0.4586 | 5.9122  | 3.38E-09 | 8.43E-08 |
| ENSBTAG00000018077 | 204.2096   | 2.7073 | 0.4231 | 6.3985  | 1.57E-10 | 5.13E-09 |
| ENSBTAG00000006846 | 457.2254   | 2.6991 | 0.6514 | 4.1433  | 3.42E-05 | 3.59E-04 |
| ENSBTAG00000019652 | 249.3855   | 2.6959 | 0.4341 | 6.2108  | 5.27E-10 | 1.53E-08 |
| ENSBTAG00000019017 | 2038.5130  | 2.6950 | 0.6215 | 4.3365  | 1.45E-05 | 1.69E-04 |



|                    |            |        |        |         |          |          |
|--------------------|------------|--------|--------|---------|----------|----------|
| ENSBTAG00000006568 | 1147.0549  | 2.6894 | 0.5903 | 4.5558  | 5.22E-06 | 6.72E-05 |
| ENSBTAG00000004216 | 390.7935   | 2.6878 | 0.3070 | 8.7553  | 2.04E-18 | 1.91E-16 |
| ENSBTAG00000018255 | 387.6863   | 2.6876 | 0.8155 | 3.2956  | 9.82E-04 | 6.38E-03 |
| ENSBTAG00000020536 | 536.3200   | 2.6855 | 0.7708 | 3.4839  | 4.94E-04 | 3.61E-03 |
| ENSBTAG00000008293 | 1309.8238  | 2.6825 | 0.3942 | 6.8057  | 1.01E-11 | 3.95E-10 |
| ENSBTAG00000043268 | 23.4523    | 2.6762 | 0.7821 | 3.4216  | 6.22E-04 | 4.41E-03 |
| ENSBTAG00000010069 | 6423.0355  | 2.6736 | 0.8367 | 3.1953  | 1.40E-03 | 8.52E-03 |
| ENSBTAG00000015188 | 1986.3955  | 2.6677 | 0.4193 | 6.3615  | 2.00E-10 | 6.40E-09 |
| ENSBTAG00000004564 | 1556.6328  | 2.6670 | 0.2578 | 10.3462 | 4.35E-25 | 8.89E-23 |
| ENSBTAG00000017233 | 119.2876   | 2.6668 | 0.7013 | 3.8025  | 1.43E-04 | 1.26E-03 |
| ENSBTAG00000003889 | 3047.8704  | 2.6562 | 0.2176 | 12.2055 | 2.91E-34 | 9.80E-32 |
| ENSBTAG00000015127 | 1836.2790  | 2.6560 | 0.6347 | 4.1843  | 2.86E-05 | 3.07E-04 |
| ENSBTAG00000012191 | 2706.9528  | 2.6478 | 0.2985 | 8.8712  | 7.24E-19 | 7.23E-17 |
| ENSBTAG00000020520 | 365.4901   | 2.6401 | 0.6429 | 4.1066  | 4.01E-05 | 4.13E-04 |
| ENSBTAG00000001822 | 381.0149   | 2.6346 | 0.6275 | 4.1985  | 2.69E-05 | 2.91E-04 |
| ENSBTAG00000010371 | 4849.4970  | 2.6276 | 0.5211 | 5.0425  | 4.59E-07 | 7.64E-06 |
| ENSBTAG00000043432 | 24.2152    | 2.6267 | 0.7741 | 3.3935  | 6.90E-04 | 4.80E-03 |
| ENSBTAG00000013793 | 376.5425   | 2.6254 | 0.3665 | 7.1641  | 7.83E-13 | 3.58E-11 |
| ENSBTAG00000021837 | 123.4193   | 2.6142 | 0.7316 | 3.5732  | 3.53E-04 | 2.70E-03 |
| ENSBTAG00000007705 | 135.3153   | 2.6071 | 0.5731 | 4.5492  | 5.39E-06 | 6.92E-05 |
| ENSBTAG00000025233 | 183.8530   | 2.6062 | 0.7318 | 3.5611  | 3.69E-04 | 2.81E-03 |
| ENSBTAG00000045896 | 250.0001   | 2.5989 | 0.5247 | 4.9535  | 7.29E-07 | 1.15E-05 |
| ENSBTAG00000012436 | 61.3316    | 2.5986 | 0.8108 | 3.2049  | 1.35E-03 | 8.32E-03 |
| ENSBTAG00000024904 | 33.5605    | 2.5970 | 0.7091 | 3.6624  | 2.50E-04 | 2.02E-03 |
| ENSBTAG00000021505 | 2485.4385  | 2.5944 | 0.2895 | 8.9614  | 3.21E-19 | 3.41E-17 |
| ENSBTAG00000010085 | 747.3401   | 2.5928 | 0.2784 | 9.3145  | 1.22E-20 | 1.60E-18 |
| ENSBTAG00000006017 | 3879.9494  | 2.5907 | 0.3768 | 6.8751  | 6.20E-12 | 2.52E-10 |
| ENSBTAG00000005745 | 2590.1458  | 2.5889 | 0.3336 | 7.7616  | 8.39E-15 | 4.96E-13 |
| ENSBTAG00000006523 | 1354.0251  | 2.5877 | 0.3483 | 7.4303  | 1.08E-13 | 5.58E-12 |
| ENSBTAG00000016494 | 1455.3213  | 2.5859 | 0.4661 | 5.5476  | 2.90E-08 | 6.04E-07 |
| ENSBTAG00000044049 | 54.7053    | 2.5798 | 0.7816 | 3.3007  | 9.64E-04 | 6.29E-03 |
| ENSBTAG00000000396 | 771.2555   | 2.5785 | 0.4548 | 5.6695  | 1.43E-08 | 3.18E-07 |
| ENSBTAG00000014947 | 14708.3628 | 2.5743 | 0.2764 | 9.3138  | 1.23E-20 | 1.60E-18 |
| ENSBTAG00000040128 | 211.0644   | 2.5685 | 0.4446 | 5.7773  | 7.59E-09 | 1.79E-07 |
| ENSBTAG00000014091 | 4031.3192  | 2.5632 | 0.7315 | 3.5040  | 4.58E-04 | 3.39E-03 |
| ENSBTAG00000014826 | 4320.7882  | 2.5611 | 0.4568 | 5.6066  | 2.06E-08 | 4.48E-07 |
| ENSBTAG00000010826 | 3442.2548  | 2.5607 | 0.3639 | 7.0367  | 1.97E-12 | 8.53E-11 |
| ENSBTAG00000021438 | 1819.1853  | 2.5588 | 0.3023 | 8.4651  | 2.56E-17 | 2.12E-15 |
| ENSBTAG00000021568 | 44.4145    | 2.5552 | 0.7770 | 3.2885  | 1.01E-03 | 6.50E-03 |
| ENSBTAG00000021523 | 7193.4909  | 2.5543 | 0.3675 | 6.9505  | 3.64E-12 | 1.50E-10 |
| ENSBTAG00000008053 | 2628.2221  | 2.5524 | 0.3031 | 8.4201  | 3.76E-17 | 3.07E-15 |
| ENSBTAG00000009284 | 72.0691    | 2.5500 | 0.6840 | 3.7279  | 1.93E-04 | 1.63E-03 |
| ENSBTAG00000004468 | 42.5050    | 2.5473 | 0.7652 | 3.3291  | 8.71E-04 | 5.79E-03 |

|                    |            |        |        |        |          |          |
|--------------------|------------|--------|--------|--------|----------|----------|
| ENSBTAG00000037533 | 7209.0251  | 2.5467 | 0.5171 | 4.9255 | 8.42E-07 | 1.32E-05 |
| ENSBTAG00000024648 | 2202.0628  | 2.5443 | 0.4461 | 5.7035 | 1.17E-08 | 2.67E-07 |
| ENSBTAG00000000815 | 3713.6853  | 2.5429 | 0.2957 | 8.5996 | 8.00E-18 | 6.92E-16 |
| ENSBTAG00000011970 | 624.3854   | 2.5386 | 0.5236 | 4.8486 | 1.24E-06 | 1.88E-05 |
| ENSBTAG00000018151 | 424.2647   | 2.5383 | 0.3655 | 6.9447 | 3.79E-12 | 1.56E-10 |
| ENSBTAG00000033961 | 411.2068   | 2.5297 | 0.4515 | 5.6031 | 2.11E-08 | 4.56E-07 |
| ENSBTAG00000031231 | 1742.5838  | 2.5274 | 0.5295 | 4.7737 | 1.81E-06 | 2.60E-05 |
| ENSBTAG00000007514 | 473.9668   | 2.5208 | 0.7466 | 3.3765 | 7.34E-04 | 5.07E-03 |
| ENSBTAG00000014390 | 647.5517   | 2.5199 | 0.5872 | 4.2912 | 1.78E-05 | 2.02E-04 |
| ENSBTAG00000003237 | 140.1828   | 2.5182 | 0.6023 | 4.1811 | 2.90E-05 | 3.11E-04 |
| ENSBTAG00000008585 | 3314.1926  | 2.5157 | 0.5631 | 4.4673 | 7.92E-06 | 9.83E-05 |
| ENSBTAG00000019312 | 3744.6300  | 2.5107 | 0.3056 | 8.2162 | 2.10E-16 | 1.53E-14 |
| ENSBTAG00000003345 | 137.3549   | 2.5106 | 0.5969 | 4.2058 | 2.60E-05 | 2.82E-04 |
| ENSBTAG00000002108 | 77118.5803 | 2.5081 | 0.4721 | 5.3123 | 1.08E-07 | 2.08E-06 |
| ENSBTAG00000015569 | 107.7328   | 2.4881 | 0.5198 | 4.7863 | 1.70E-06 | 2.47E-05 |
| ENSBTAG00000031962 | 135.9291   | 2.4851 | 0.5735 | 4.3334 | 1.47E-05 | 1.71E-04 |
| ENSBTAG00000037907 | 5402.1314  | 2.4837 | 0.5201 | 4.7754 | 1.79E-06 | 2.58E-05 |
| ENSBTAG00000019900 | 1344.1985  | 2.4815 | 0.3885 | 6.3878 | 1.68E-10 | 5.44E-09 |
| ENSBTAG00000022007 | 302.4522   | 2.4788 | 0.5725 | 4.3297 | 1.49E-05 | 1.74E-04 |
| ENSBTAG00000021457 | 181.5558   | 2.4698 | 0.7082 | 3.4875 | 4.88E-04 | 3.58E-03 |
| ENSBTAG00000009654 | 501.4597   | 2.4660 | 0.6358 | 3.8788 | 1.05E-04 | 9.58E-04 |
| ENSBTAG00000011909 | 2071.3635  | 2.4635 | 0.2784 | 8.8492 | 8.81E-19 | 8.67E-17 |
| ENSBTAG00000018043 | 353.6681   | 2.4597 | 0.5396 | 4.5585 | 5.15E-06 | 6.66E-05 |
| ENSBTAG00000005043 | 3386.5329  | 2.4584 | 0.6333 | 3.8821 | 1.04E-04 | 9.46E-04 |
| ENSBTAG00000019059 | 139.6131   | 2.4510 | 0.6593 | 3.7176 | 2.01E-04 | 1.68E-03 |
| ENSBTAG00000015166 | 46.2610    | 2.4441 | 0.6861 | 3.5624 | 3.68E-04 | 2.80E-03 |
| ENSBTAG00000011793 | 6342.4504  | 2.4441 | 0.3639 | 6.7157 | 1.87E-11 | 7.03E-10 |
| ENSBTAG00000004787 | 365.0731   | 2.4407 | 0.6439 | 3.7905 | 1.50E-04 | 1.31E-03 |
| ENSBTAG00000020764 | 558.3394   | 2.4395 | 0.6001 | 4.0651 | 4.80E-05 | 4.81E-04 |
| ENSBTAG00000008809 | 55.1561    | 2.4323 | 0.5760 | 4.2229 | 2.41E-05 | 2.64E-04 |
| ENSBTAG00000044064 | 1897.4203  | 2.4298 | 0.3197 | 7.5994 | 2.97E-14 | 1.63E-12 |
| ENSBTAG00000013706 | 106.7812   | 2.4278 | 0.7671 | 3.1648 | 1.55E-03 | 9.25E-03 |
| ENSBTAG00000012781 | 21004.3384 | 2.4174 | 0.3352 | 7.2111 | 5.55E-13 | 2.65E-11 |
| ENSBTAG00000038794 | 2809.4131  | 2.4118 | 0.4291 | 5.6210 | 1.90E-08 | 4.14E-07 |
| ENSBTAG00000001146 | 697.0519   | 2.4098 | 0.3975 | 6.0626 | 1.34E-09 | 3.64E-08 |
| ENSBTAG00000003120 | 1270.6775  | 2.4075 | 0.3686 | 6.5308 | 6.54E-11 | 2.24E-09 |
| ENSBTAG00000002527 | 176.9617   | 2.4052 | 0.3662 | 6.5681 | 5.10E-11 | 1.79E-09 |
| ENSBTAG00000000446 | 351.4221   | 2.4006 | 0.4351 | 5.5176 | 3.44E-08 | 7.08E-07 |
| ENSBTAG00000015341 | 827.7085   | 2.3992 | 0.5323 | 4.5076 | 6.56E-06 | 8.28E-05 |
| ENSBTAG00000005072 | 27.2115    | 2.3922 | 0.7183 | 3.3303 | 8.68E-04 | 5.78E-03 |
| ENSBTAG00000003375 | 2236.3283  | 2.3906 | 0.5196 | 4.6011 | 4.20E-06 | 5.55E-05 |
| ENSBTAG00000002938 | 409.1860   | 2.3894 | 0.3863 | 6.1854 | 6.19E-10 | 1.78E-08 |
| ENSBTAG00000015543 | 10924.0468 | 2.3757 | 0.4300 | 5.5253 | 3.29E-08 | 6.80E-07 |

|                    |             |        |        |         |          |          |
|--------------------|-------------|--------|--------|---------|----------|----------|
| ENSBTAG00000034848 | 1297.0319   | 2.3721 | 0.5519 | 4.2980  | 1.72E-05 | 1.97E-04 |
| ENSBTAG00000014269 | 99216.9957  | 2.3645 | 0.4921 | 4.8050  | 1.55E-06 | 2.28E-05 |
| ENSBTAG00000010171 | 5187.4675   | 2.3625 | 0.2209 | 10.6932 | 1.09E-26 | 2.46E-24 |
| ENSBTAG00000045500 | 152.8593    | 2.3519 | 0.4493 | 5.2349  | 1.65E-07 | 3.08E-06 |
| ENSBTAG00000009239 | 127.8547    | 2.3512 | 0.4994 | 4.7083  | 2.50E-06 | 3.47E-05 |
| ENSBTAG00000007922 | 81.5115     | 2.3443 | 0.4882 | 4.8016  | 1.57E-06 | 2.31E-05 |
| ENSBTAG00000011912 | 1256.0832   | 2.3430 | 0.4028 | 5.8164  | 6.01E-09 | 1.43E-07 |
| ENSBTAG00000038079 | 1608.6853   | 2.3342 | 0.5069 | 4.6047  | 4.13E-06 | 5.47E-05 |
| ENSBTAG00000020330 | 64907.1012  | 2.3235 | 0.3537 | 6.5683  | 5.09E-11 | 1.79E-09 |
| ENSBTAG00000003012 | 833.4196    | 2.3160 | 0.4506 | 5.1401  | 2.75E-07 | 4.85E-06 |
| ENSBTAG00000027655 | 127.7520    | 2.3075 | 0.4631 | 4.9826  | 6.27E-07 | 1.01E-05 |
| ENSBTAG00000010522 | 278.9767    | 2.3045 | 0.7153 | 3.2218  | 1.27E-03 | 7.90E-03 |
| ENSBTAG00000016060 | 808.9224    | 2.3019 | 0.3081 | 7.4713  | 7.94E-14 | 4.18E-12 |
| ENSBTAG00000005744 | 5232.0558   | 2.2993 | 0.3837 | 5.9918  | 2.08E-09 | 5.42E-08 |
| ENSBTAG00000006928 | 106847.9997 | 2.2963 | 0.5909 | 3.8865  | 1.02E-04 | 9.32E-04 |
| ENSBTAG00000046561 | 1410.6307   | 2.2955 | 0.2757 | 8.3261  | 8.35E-17 | 6.51E-15 |
| ENSBTAG00000025554 | 63.2922     | 2.2945 | 0.5900 | 3.8891  | 1.01E-04 | 9.22E-04 |
| ENSBTAG00000005208 | 1060.0203   | 2.2840 | 0.3124 | 7.3116  | 2.64E-13 | 1.29E-11 |
| ENSBTAG00000002804 | 128.7395    | 2.2653 | 0.4437 | 5.1058  | 3.29E-07 | 5.69E-06 |
| ENSBTAG00000009201 | 379.7499    | 2.2589 | 0.5183 | 4.3582  | 1.31E-05 | 1.56E-04 |
| ENSBTAG00000000266 | 2929.2015   | 2.2579 | 0.3066 | 7.3639  | 1.79E-13 | 8.92E-12 |
| ENSBTAG00000013863 | 1728.7157   | 2.2530 | 0.5935 | 3.7960  | 1.47E-04 | 1.29E-03 |
| ENSBTAG00000012107 | 9573.0485   | 2.2528 | 0.4251 | 5.2995  | 1.16E-07 | 2.22E-06 |
| ENSBTAG00000003532 | 1075.2285   | 2.2526 | 0.3996 | 5.6371  | 1.73E-08 | 3.81E-07 |
| ENSBTAG00000010388 | 60.5397     | 2.2505 | 0.7140 | 3.1521  | 1.62E-03 | 9.60E-03 |
| ENSBTAG00000010106 | 3544.4755   | 2.2493 | 0.4015 | 5.6020  | 2.12E-08 | 4.58E-07 |
| ENSBTAG00000004196 | 763.7178    | 2.2465 | 0.6393 | 3.5142  | 4.41E-04 | 3.28E-03 |
| ENSBTAG00000009749 | 125.3801    | 2.2387 | 0.7004 | 3.1964  | 1.39E-03 | 8.50E-03 |
| ENSBTAG00000000222 | 2475.8133   | 2.2370 | 0.3034 | 7.3733  | 1.66E-13 | 8.37E-12 |
| ENSBTAG00000001579 | 1431.1497   | 2.2327 | 0.2811 | 7.9441  | 1.96E-15 | 1.29E-13 |
| ENSBTAG00000007651 | 433.2489    | 2.2224 | 0.4165 | 5.3361  | 9.50E-08 | 1.84E-06 |
| ENSBTAG00000017639 | 1267.5420   | 2.2189 | 0.2837 | 7.8228  | 5.17E-15 | 3.19E-13 |
| ENSBTAG00000004964 | 474.7365    | 2.2145 | 0.2975 | 7.4446  | 9.72E-14 | 5.02E-12 |
| ENSBTAG00000021767 | 12178.0845  | 2.2095 | 0.3124 | 7.0730  | 1.52E-12 | 6.73E-11 |
| ENSBTAG00000024105 | 50.5060     | 2.1952 | 0.6665 | 3.2936  | 9.89E-04 | 6.42E-03 |
| ENSBTAG00000018951 | 1728.9458   | 2.1925 | 0.4745 | 4.6207  | 3.83E-06 | 5.11E-05 |
| ENSBTAG00000010361 | 8682.5872   | 2.1886 | 0.4778 | 4.5806  | 4.64E-06 | 6.06E-05 |
| ENSBTAG00000021818 | 1523.3348   | 2.1835 | 0.3875 | 5.6344  | 1.76E-08 | 3.86E-07 |
| ENSBTAG00000015147 | 505.9634    | 2.1831 | 0.3592 | 6.0783  | 1.21E-09 | 3.31E-08 |
| ENSBTAG00000020281 | 1933.3779   | 2.1818 | 0.4022 | 5.4250  | 5.79E-08 | 1.15E-06 |
| ENSBTAG00000013196 | 146.7533    | 2.1794 | 0.6303 | 3.4577  | 5.45E-04 | 3.94E-03 |
| ENSBTAG00000047077 | 1937.7514   | 2.1644 | 0.3083 | 7.0212  | 2.20E-12 | 9.41E-11 |
| ENSBTAG00000008530 | 301.0619    | 2.1620 | 0.3663 | 5.9026  | 3.58E-09 | 8.85E-08 |

|                    |            |        |        |        |          |          |
|--------------------|------------|--------|--------|--------|----------|----------|
| ENSBTAG00000001141 | 15343.9565 | 2.1515 | 0.3251 | 6.6173 | 3.66E-11 | 1.32E-09 |
| ENSBTAG00000014551 | 151.6153   | 2.1462 | 0.5911 | 3.6305 | 2.83E-04 | 2.24E-03 |
| ENSBTAG00000018157 | 1952.9350  | 2.1331 | 0.4469 | 4.7729 | 1.82E-06 | 2.60E-05 |
| ENSBTAG00000044077 | 101.9581   | 2.1319 | 0.4569 | 4.6656 | 3.08E-06 | 4.19E-05 |
| ENSBTAG00000047648 | 347.1199   | 2.1299 | 0.6593 | 3.2306 | 1.24E-03 | 7.70E-03 |
| ENSBTAG00000017488 | 888.5496   | 2.1298 | 0.3247 | 6.5584 | 5.44E-11 | 1.90E-09 |
| ENSBTAG00000013869 | 4681.8428  | 2.1295 | 0.2711 | 7.8549 | 4.00E-15 | 2.55E-13 |
| ENSBTAG00000011744 | 1572.1375  | 2.1293 | 0.2856 | 7.4557 | 8.94E-14 | 4.67E-12 |
| ENSBTAG00000002836 | 1304.1169  | 2.1262 | 0.4109 | 5.1748 | 2.28E-07 | 4.12E-06 |
| ENSBTAG00000042974 | 45.2399    | 2.1250 | 0.6318 | 3.3632 | 7.70E-04 | 5.28E-03 |
| ENSBTAG00000015413 | 251.9515   | 2.1182 | 0.4400 | 4.8146 | 1.47E-06 | 2.18E-05 |
| ENSBTAG00000017907 | 826.0190   | 2.1130 | 0.3583 | 5.8979 | 3.68E-09 | 9.06E-08 |
| ENSBTAG00000015606 | 115.9744   | 2.1110 | 0.4145 | 5.0931 | 3.52E-07 | 6.04E-06 |
| ENSBTAG00000014650 | 995.7060   | 2.1109 | 0.2735 | 7.7180 | 1.18E-14 | 6.84E-13 |
| ENSBTAG00000014538 | 94.4638    | 2.1072 | 0.6181 | 3.4093 | 6.51E-04 | 4.57E-03 |
| ENSBTAG00000000897 | 4196.7631  | 2.1065 | 0.5072 | 4.1535 | 3.27E-05 | 3.47E-04 |
| ENSBTAG00000010344 | 780.8833   | 2.0989 | 0.5950 | 3.5277 | 4.19E-04 | 3.13E-03 |
| ENSBTAG00000015498 | 45.7167    | 2.0979 | 0.6528 | 3.2135 | 1.31E-03 | 8.10E-03 |
| ENSBTAG00000005997 | 8587.7135  | 2.0908 | 0.4776 | 4.3777 | 1.20E-05 | 1.43E-04 |
| ENSBTAG00000020975 | 210.5871   | 2.0903 | 0.4002 | 5.2238 | 1.75E-07 | 3.25E-06 |
| ENSBTAG00000010376 | 7355.2078  | 2.0902 | 0.2624 | 7.9655 | 1.65E-15 | 1.10E-13 |
| ENSBTAG00000015580 | 2822.6730  | 2.0901 | 0.3541 | 5.9030 | 3.57E-09 | 8.85E-08 |
| ENSBTAG00000012408 | 191.2258   | 2.0882 | 0.5148 | 4.0561 | 4.99E-05 | 4.97E-04 |
| ENSBTAG00000019919 | 61.8296    | 2.0876 | 0.6428 | 3.2477 | 1.16E-03 | 7.32E-03 |
| ENSBTAG00000000053 | 1717.5346  | 2.0773 | 0.3892 | 5.3371 | 9.44E-08 | 1.84E-06 |
| ENSBTAG00000020780 | 3358.9432  | 2.0737 | 0.3993 | 5.1933 | 2.07E-07 | 3.75E-06 |
| ENSBTAG00000003845 | 281.3724   | 2.0699 | 0.4711 | 4.3942 | 1.11E-05 | 1.34E-04 |
| ENSBTAG00000024578 | 34.2303    | 2.0586 | 0.6152 | 3.3464 | 8.19E-04 | 5.53E-03 |
| ENSBTAG00000009428 | 113.9638   | 2.0516 | 0.4911 | 4.1777 | 2.94E-05 | 3.15E-04 |
| ENSBTAG00000014636 | 1188.1509  | 2.0328 | 0.2273 | 8.9421 | 3.82E-19 | 3.93E-17 |
| ENSBTAG00000032905 | 1819.4580  | 2.0325 | 0.3232 | 6.2894 | 3.19E-10 | 9.88E-09 |
| ENSBTAG00000021813 | 3868.6250  | 2.0191 | 0.5344 | 3.7786 | 1.58E-04 | 1.36E-03 |
| ENSBTAG00000046837 | 15557.6721 | 2.0157 | 0.3222 | 6.2558 | 3.95E-10 | 1.18E-08 |
| ENSBTAG00000000877 | 390.1225   | 2.0153 | 0.2918 | 6.9076 | 4.93E-12 | 2.02E-10 |
| ENSBTAG00000025856 | 2300.3456  | 2.0137 | 0.3605 | 5.5858 | 2.33E-08 | 4.95E-07 |
| ENSBTAG00000001294 | 1943.1496  | 2.0059 | 0.4416 | 4.5425 | 5.56E-06 | 7.12E-05 |
| ENSBTAG00000011866 | 663.8143   | 1.9977 | 0.4463 | 4.4762 | 7.60E-06 | 9.46E-05 |
| ENSBTAG00000009952 | 573.0594   | 1.9952 | 0.3371 | 5.9185 | 3.25E-09 | 8.16E-08 |
| ENSBTAG00000017490 | 12520.2818 | 1.9945 | 0.4083 | 4.8845 | 1.04E-06 | 1.61E-05 |
| ENSBTAG00000037804 | 214.4320   | 1.9932 | 0.6078 | 3.2794 | 1.04E-03 | 6.69E-03 |
| ENSBTAG00000011460 | 439.0249   | 1.9905 | 0.4255 | 4.6786 | 2.89E-06 | 3.97E-05 |
| ENSBTAG00000013996 | 375.6471   | 1.9892 | 0.5721 | 3.4772 | 5.07E-04 | 3.70E-03 |
| ENSBTAG00000015457 | 1009.9585  | 1.9854 | 0.4783 | 4.1506 | 3.32E-05 | 3.50E-04 |

|                    |            |        |        |        |          |          |
|--------------------|------------|--------|--------|--------|----------|----------|
| ENSBTAG00000004406 | 1442.1891  | 1.9845 | 0.2326 | 8.5317 | 1.44E-17 | 1.24E-15 |
| ENSBTAG00000007646 | 131.9339   | 1.9816 | 0.5781 | 3.4278 | 6.08E-04 | 4.32E-03 |
| ENSBTAG00000010416 | 451.4807   | 1.9813 | 0.2988 | 6.6312 | 3.33E-11 | 1.21E-09 |
| ENSBTAG00000005523 | 134.8260   | 1.9800 | 0.5397 | 3.6690 | 2.43E-04 | 1.98E-03 |
| ENSBTAG00000032055 | 3208.9579  | 1.9790 | 0.3991 | 4.9591 | 7.08E-07 | 1.12E-05 |
| ENSBTAG00000016406 | 866.8235   | 1.9728 | 0.4732 | 4.1689 | 3.06E-05 | 3.27E-04 |
| ENSBTAG00000009778 | 677.7437   | 1.9710 | 0.2631 | 7.4907 | 6.85E-14 | 3.64E-12 |
| ENSBTAG00000000793 | 2670.8417  | 1.9640 | 0.4063 | 4.8340 | 1.34E-06 | 2.00E-05 |
| ENSBTAG00000015381 | 18101.5350 | 1.9627 | 0.5290 | 3.7105 | 2.07E-04 | 1.72E-03 |
| ENSBTAG00000012577 | 280.2613   | 1.9597 | 0.4804 | 4.0793 | 4.52E-05 | 4.57E-04 |
| ENSBTAG00000018862 | 147.4427   | 1.9550 | 0.5896 | 3.3158 | 9.14E-04 | 6.02E-03 |
| ENSBTAG00000011986 | 1092.8592  | 1.9499 | 0.5830 | 3.3447 | 8.24E-04 | 5.56E-03 |
| ENSBTAG00000030836 | 1014.8909  | 1.9470 | 0.2652 | 7.3417 | 2.11E-13 | 1.04E-11 |
| ENSBTAG00000002688 | 13318.4043 | 1.9369 | 0.3291 | 5.8854 | 3.97E-09 | 9.73E-08 |
| ENSBTAG00000001511 | 1516.7744  | 1.9343 | 0.4747 | 4.0746 | 4.61E-05 | 4.65E-04 |
| ENSBTAG00000015670 | 52.8482    | 1.9258 | 0.6027 | 3.1955 | 1.40E-03 | 8.52E-03 |
| ENSBTAG00000002164 | 196.1777   | 1.9230 | 0.4847 | 3.9678 | 7.26E-05 | 6.92E-04 |
| ENSBTAG00000006593 | 820.1949   | 1.9204 | 0.3080 | 6.2348 | 4.52E-10 | 1.34E-08 |
| ENSBTAG00000000675 | 2198.3630  | 1.9171 | 0.4350 | 4.4075 | 1.05E-05 | 1.26E-04 |
| ENSBTAG00000017457 | 416.0405   | 1.9160 | 0.5195 | 3.6880 | 2.26E-04 | 1.86E-03 |
| ENSBTAG00000018324 | 124.1713   | 1.9149 | 0.4799 | 3.9905 | 6.59E-05 | 6.38E-04 |
| ENSBTAG00000016933 | 1761.5643  | 1.9104 | 0.2661 | 7.1782 | 7.06E-13 | 3.24E-11 |
| ENSBTAG00000002336 | 300.5272   | 1.9096 | 0.4936 | 3.8690 | 1.09E-04 | 9.93E-04 |
| ENSBTAG00000019018 | 2329.8758  | 1.9023 | 0.5821 | 3.2677 | 1.08E-03 | 6.91E-03 |
| ENSBTAG00000003587 | 551.0854   | 1.8926 | 0.2775 | 6.8209 | 9.05E-12 | 3.59E-10 |
| ENSBTAG00000018093 | 1468.8979  | 1.8905 | 0.4632 | 4.0813 | 4.48E-05 | 4.54E-04 |
| ENSBTAG00000007071 | 736.1500   | 1.8845 | 0.5498 | 3.4279 | 6.08E-04 | 4.32E-03 |
| ENSBTAG00000002576 | 4407.0165  | 1.8774 | 0.4588 | 4.0920 | 4.28E-05 | 4.37E-04 |
| ENSBTAG00000018986 | 4120.8416  | 1.8762 | 0.3667 | 5.1169 | 3.11E-07 | 5.41E-06 |
| ENSBTAG00000011204 | 22481.5836 | 1.8667 | 0.5107 | 3.6552 | 2.57E-04 | 2.07E-03 |
| ENSBTAG00000016217 | 1221.4838  | 1.8640 | 0.4867 | 3.8297 | 1.28E-04 | 1.14E-03 |
| ENSBTAG00000011770 | 632.7575   | 1.8636 | 0.3976 | 4.6875 | 2.77E-06 | 3.82E-05 |
| ENSBTAG00000046841 | 3334.6692  | 1.8615 | 0.2879 | 6.4654 | 1.01E-10 | 3.36E-09 |
| ENSBTAG00000011765 | 11633.9920 | 1.8608 | 0.2559 | 7.2703 | 3.59E-13 | 1.73E-11 |
| ENSBTAG00000020125 | 900.0137   | 1.8531 | 0.3680 | 5.0353 | 4.77E-07 | 7.87E-06 |
| ENSBTAG00000046664 | 1124.0679  | 1.8515 | 0.2781 | 6.6578 | 2.78E-11 | 1.02E-09 |
| ENSBTAG00000016529 | 903.0945   | 1.8483 | 0.5605 | 3.2974 | 9.76E-04 | 6.35E-03 |
| ENSBTAG00000008635 | 535.0088   | 1.8458 | 0.5056 | 3.6505 | 2.62E-04 | 2.10E-03 |
| ENSBTAG00000017745 | 2731.2206  | 1.8411 | 0.5019 | 3.6681 | 2.44E-04 | 1.98E-03 |
| ENSBTAG00000004118 | 4270.2522  | 1.8392 | 0.3540 | 5.1953 | 2.04E-07 | 3.71E-06 |
| ENSBTAG00000020272 | 2880.3367  | 1.8334 | 0.4312 | 4.2520 | 2.12E-05 | 2.36E-04 |
| ENSBTAG00000013925 | 533.8607   | 1.8295 | 0.2870 | 6.3749 | 1.83E-10 | 5.89E-09 |
| ENSBTAG00000023629 | 586.8013   | 1.8281 | 0.3788 | 4.8255 | 1.40E-06 | 2.08E-05 |

|                    |            |        |        |        |          |          |
|--------------------|------------|--------|--------|--------|----------|----------|
| ENSBTAG00000013074 | 6812.4690  | 1.8279 | 0.1989 | 9.1882 | 3.99E-20 | 4.60E-18 |
| ENSBTAG00000004291 | 419.2680   | 1.8252 | 0.3800 | 4.8034 | 1.56E-06 | 2.29E-05 |
| ENSBTAG00000000505 | 1644.7991  | 1.8141 | 0.3988 | 4.5486 | 5.40E-06 | 6.93E-05 |
| ENSBTAG00000019530 | 123.0538   | 1.8090 | 0.5327 | 3.3960 | 6.84E-04 | 4.76E-03 |
| ENSBTAG00000014215 | 1541.7137  | 1.7943 | 0.3474 | 5.1643 | 2.41E-07 | 4.34E-06 |
| ENSBTAG00000000040 | 672.6958   | 1.7924 | 0.2833 | 6.3265 | 2.51E-10 | 7.90E-09 |
| ENSBTAG00000011933 | 2379.9773  | 1.7889 | 0.4017 | 4.4535 | 8.45E-06 | 1.04E-04 |
| ENSBTAG00000008401 | 1158.5253  | 1.7883 | 0.5377 | 3.3258 | 8.82E-04 | 5.84E-03 |
| ENSBTAG00000048062 | 1924.5580  | 1.7866 | 0.3684 | 4.8497 | 1.24E-06 | 1.87E-05 |
| ENSBTAG00000018569 | 3867.4229  | 1.7832 | 0.2969 | 6.0058 | 1.90E-09 | 5.04E-08 |
| ENSBTAG00000004659 | 1226.0283  | 1.7797 | 0.4492 | 3.9622 | 7.43E-05 | 7.06E-04 |
| ENSBTAG00000006785 | 902.8090   | 1.7760 | 0.4237 | 4.1912 | 2.78E-05 | 3.00E-04 |
| ENSBTAG00000012170 | 4950.3846  | 1.7736 | 0.2141 | 8.2837 | 1.19E-16 | 9.15E-15 |
| ENSBTAG00000005025 | 2324.5007  | 1.7717 | 0.1996 | 8.8762 | 6.92E-19 | 6.96E-17 |
| ENSBTAG00000004154 | 602.6215   | 1.7707 | 0.5278 | 3.3549 | 7.94E-04 | 5.41E-03 |
| ENSBTAG00000045702 | 526.2821   | 1.7698 | 0.4450 | 3.9766 | 6.99E-05 | 6.72E-04 |
| ENSBTAG00000015195 | 18418.0816 | 1.7668 | 0.4357 | 4.0556 | 5.00E-05 | 4.98E-04 |
| ENSBTAG00000023718 | 2322.1586  | 1.7649 | 0.4665 | 3.7835 | 1.55E-04 | 1.34E-03 |
| ENSBTAG00000013555 | 1163.1568  | 1.7647 | 0.3466 | 5.0914 | 3.55E-07 | 6.08E-06 |
| ENSBTAG00000046971 | 7051.8077  | 1.7645 | 0.3670 | 4.8084 | 1.52E-06 | 2.24E-05 |
| ENSBTAG00000014076 | 1669.3965  | 1.7600 | 0.2411 | 7.2999 | 2.88E-13 | 1.40E-11 |
| ENSBTAG00000021103 | 15278.1700 | 1.7573 | 0.3286 | 5.3476 | 8.91E-08 | 1.74E-06 |
| ENSBTAG00000009887 | 6473.4722  | 1.7563 | 0.4014 | 4.3751 | 1.21E-05 | 1.44E-04 |
| ENSBTAG00000015969 | 525.2248   | 1.7560 | 0.3086 | 5.6903 | 1.27E-08 | 2.85E-07 |
| ENSBTAG00000009112 | 1356.2842  | 1.7534 | 0.5149 | 3.4054 | 6.61E-04 | 4.63E-03 |
| ENSBTAG00000007320 | 5177.9674  | 1.7529 | 0.3184 | 5.5058 | 3.68E-08 | 7.52E-07 |
| ENSBTAG00000010546 | 656.4487   | 1.7509 | 0.4298 | 4.0739 | 4.62E-05 | 4.65E-04 |
| ENSBTAG00000045822 | 4788.8394  | 1.7460 | 0.4395 | 3.9723 | 7.12E-05 | 6.82E-04 |
| ENSBTAG00000008169 | 255.2346   | 1.7394 | 0.4624 | 3.7614 | 1.69E-04 | 1.45E-03 |
| ENSBTAG00000027064 | 4742.4804  | 1.7287 | 0.4626 | 3.7369 | 1.86E-04 | 1.58E-03 |
| ENSBTAG00000019456 | 413.1778   | 1.7275 | 0.2809 | 6.1500 | 7.75E-10 | 2.18E-08 |
| ENSBTAG00000003960 | 630.1053   | 1.7270 | 0.3446 | 5.0110 | 5.41E-07 | 8.84E-06 |
| ENSBTAG00000016751 | 11975.8988 | 1.7238 | 0.2910 | 5.9229 | 3.16E-09 | 8.01E-08 |
| ENSBTAG00000020996 | 6402.5088  | 1.7224 | 0.2623 | 6.5667 | 5.15E-11 | 1.81E-09 |
| ENSBTAG00000015649 | 790.0651   | 1.7215 | 0.3925 | 4.3863 | 1.15E-05 | 1.38E-04 |
| ENSBTAG00000009471 | 645.1553   | 1.7206 | 0.5482 | 3.1384 | 1.70E-03 | 9.98E-03 |
| ENSBTAG00000008323 | 166.1424   | 1.7161 | 0.4000 | 4.2904 | 1.78E-05 | 2.02E-04 |
| ENSBTAG00000013577 | 391.0146   | 1.7116 | 0.4473 | 3.8265 | 1.30E-04 | 1.16E-03 |
| ENSBTAG00000013063 | 7790.4638  | 1.7087 | 0.4515 | 3.7843 | 1.54E-04 | 1.34E-03 |
| ENSBTAG00000000928 | 295.5750   | 1.6985 | 0.3021 | 5.6221 | 1.89E-08 | 4.12E-07 |
| ENSBTAG00000016649 | 20759.9431 | 1.6963 | 0.4275 | 3.9678 | 7.25E-05 | 6.92E-04 |
| ENSBTAG00000019414 | 851.4643   | 1.6955 | 0.5362 | 3.1620 | 1.57E-03 | 9.32E-03 |
| ENSBTAG00000045886 | 163.3105   | 1.6940 | 0.4797 | 3.5314 | 4.13E-04 | 3.10E-03 |

|                      |            |        |        |        |          |          |
|----------------------|------------|--------|--------|--------|----------|----------|
| ENSBTAG00000005833   | 1422.5122  | 1.6933 | 0.3023 | 5.6018 | 2.12E-08 | 4.58E-07 |
| ENSBTAG000000046503  | 1846.7718  | 1.6895 | 0.2493 | 6.7766 | 1.23E-11 | 4.79E-10 |
| ENSBTAG000000009138  | 437.9660   | 1.6885 | 0.3890 | 4.3411 | 1.42E-05 | 1.67E-04 |
| ENSBTAG000000018334  | 227.5634   | 1.6856 | 0.3236 | 5.2093 | 1.90E-07 | 3.48E-06 |
| ENSBTAG000000012735  | 124.9672   | 1.6784 | 0.4166 | 4.0286 | 5.61E-05 | 5.54E-04 |
| ENSBTAG000000011772  | 1126.8904  | 1.6691 | 0.4026 | 4.1454 | 3.39E-05 | 3.57E-04 |
| ENSBTAG000000003290  | 257.2887   | 1.6603 | 0.5284 | 3.1420 | 1.68E-03 | 9.88E-03 |
| ENSBTAG000000008330  | 692.8459   | 1.6595 | 0.4693 | 3.5360 | 4.06E-04 | 3.05E-03 |
| ENSBTAG000000039764  | 532.1311   | 1.6534 | 0.4357 | 3.7945 | 1.48E-04 | 1.29E-03 |
| ENSBTAG000000010785  | 246.1412   | 1.6481 | 0.3398 | 4.8509 | 1.23E-06 | 1.86E-05 |
| ENSBTAG000000003895  | 370.7871   | 1.6480 | 0.4528 | 3.6398 | 2.73E-04 | 2.17E-03 |
| ENSBTAG000000005286  | 1991.7899  | 1.6422 | 0.3588 | 4.5775 | 4.70E-06 | 6.13E-05 |
| ENSBTAG000000003039  | 908.5325   | 1.6383 | 0.4533 | 3.6144 | 3.01E-04 | 2.36E-03 |
| ENSBTAG000000001886  | 400.2091   | 1.6369 | 0.4524 | 3.6179 | 2.97E-04 | 2.33E-03 |
| ENSBTAG000000020454  | 755.9410   | 1.6357 | 0.3925 | 4.1669 | 3.09E-05 | 3.29E-04 |
| ENSBTAG000000001117  | 1398.3916  | 1.6309 | 0.4141 | 3.9383 | 8.20E-05 | 7.69E-04 |
| ENSBTAG000000013524  | 788.8430   | 1.6294 | 0.3185 | 5.1155 | 3.13E-07 | 5.44E-06 |
| ENSBTAG000000018704  | 2102.8381  | 1.6249 | 0.5146 | 3.1573 | 1.59E-03 | 9.45E-03 |
| ENSBTAG000000002329  | 654.4086   | 1.6234 | 0.3859 | 4.2072 | 2.59E-05 | 2.81E-04 |
| ENSBTAG0000000031829 | 1344.1315  | 1.6193 | 0.4394 | 3.6851 | 2.29E-04 | 1.88E-03 |
| ENSBTAG0000000014366 | 16039.5282 | 1.6190 | 0.4339 | 3.7311 | 1.91E-04 | 1.61E-03 |
| ENSBTAG0000000021209 | 12478.1271 | 1.6168 | 0.2793 | 5.7895 | 7.06E-09 | 1.67E-07 |
| ENSBTAG000000012833  | 1076.4058  | 1.6155 | 0.2947 | 5.4821 | 4.20E-08 | 8.55E-07 |
| ENSBTAG000000003295  | 420.1306   | 1.6128 | 0.4700 | 3.4318 | 6.00E-04 | 4.27E-03 |
| ENSBTAG000000011994  | 2222.4870  | 1.6085 | 0.3179 | 5.0604 | 4.18E-07 | 7.06E-06 |
| ENSBTAG0000000021011 | 217.2226   | 1.6061 | 0.3500 | 4.5883 | 4.47E-06 | 5.87E-05 |
| ENSBTAG000000008954  | 1880.6148  | 1.6056 | 0.4807 | 3.3401 | 8.37E-04 | 5.64E-03 |
| ENSBTAG000000011880  | 596.1697   | 1.6022 | 0.4036 | 3.9700 | 7.19E-05 | 6.88E-04 |
| ENSBTAG0000000015113 | 1704.0133  | 1.5999 | 0.4418 | 3.6210 | 2.93E-04 | 2.30E-03 |
| ENSBTAG000000019839  | 4011.0448  | 1.5966 | 0.3969 | 4.0223 | 5.76E-05 | 5.67E-04 |
| ENSBTAG000000006193  | 887.5192   | 1.5932 | 0.4828 | 3.3003 | 9.66E-04 | 6.29E-03 |
| ENSBTAG0000000020616 | 1753.2565  | 1.5930 | 0.3093 | 5.1500 | 2.60E-07 | 4.65E-06 |
| ENSBTAG000000004688  | 57341.4411 | 1.5929 | 0.3180 | 5.0086 | 5.48E-07 | 8.93E-06 |
| ENSBTAG000000012694  | 204.6281   | 1.5901 | 0.4317 | 3.6829 | 2.31E-04 | 1.89E-03 |
| ENSBTAG000000018937  | 2628.0553  | 1.5841 | 0.2683 | 5.9042 | 3.54E-09 | 8.80E-08 |
| ENSBTAG000000001576  | 95.9240    | 1.5823 | 0.4901 | 3.2284 | 1.24E-03 | 7.75E-03 |
| ENSBTAG000000003928  | 914.9318   | 1.5789 | 0.4292 | 3.6785 | 2.35E-04 | 1.92E-03 |
| ENSBTAG0000000021342 | 874.3578   | 1.5788 | 0.2705 | 5.8361 | 5.34E-09 | 1.28E-07 |
| ENSBTAG000000010395  | 1152.6135  | 1.5781 | 0.3068 | 5.1432 | 2.70E-07 | 4.79E-06 |
| ENSBTAG000000010906  | 1414.9836  | 1.5769 | 0.2509 | 6.2851 | 3.28E-10 | 1.01E-08 |
| ENSBTAG000000020084  | 596.0426   | 1.5759 | 0.3017 | 5.2237 | 1.75E-07 | 3.25E-06 |
| ENSBTAG000000044065  | 162.1335   | 1.5696 | 0.4674 | 3.3578 | 7.86E-04 | 5.37E-03 |
| ENSBTAG000000017096  | 529.1194   | 1.5665 | 0.4127 | 3.7959 | 1.47E-04 | 1.29E-03 |

|                    |             |        |        |        |          |          |
|--------------------|-------------|--------|--------|--------|----------|----------|
| ENSBTAG00000003081 | 4145.2220   | 1.5658 | 0.2850 | 5.4938 | 3.93E-08 | 8.03E-07 |
| ENSBTAG00000004881 | 600.2126    | 1.5629 | 0.3101 | 5.0407 | 4.64E-07 | 7.70E-06 |
| ENSBTAG00000016600 | 199.7873    | 1.5621 | 0.4568 | 3.4199 | 6.26E-04 | 4.43E-03 |
| ENSBTAG00000014021 | 254.0895    | 1.5618 | 0.4248 | 3.6764 | 2.37E-04 | 1.93E-03 |
| ENSBTAG00000016206 | 3698.6734   | 1.5604 | 0.3205 | 4.8684 | 1.13E-06 | 1.73E-05 |
| ENSBTAG00000019479 | 781.5722    | 1.5516 | 0.3285 | 4.7238 | 2.32E-06 | 3.24E-05 |
| ENSBTAG00000010928 | 409.4299    | 1.5498 | 0.3739 | 4.1446 | 3.40E-05 | 3.58E-04 |
| ENSBTAG00000008091 | 81.9241     | 1.5478 | 0.4691 | 3.2995 | 9.69E-04 | 6.31E-03 |
| ENSBTAG00000012575 | 1734.3490   | 1.5438 | 0.2743 | 5.6291 | 1.81E-08 | 3.97E-07 |
| ENSBTAG00000012450 | 1331.1655   | 1.5413 | 0.3703 | 4.1623 | 3.15E-05 | 3.35E-04 |
| ENSBTAG00000010549 | 775.3812    | 1.5407 | 0.4467 | 3.4492 | 5.62E-04 | 4.05E-03 |
| ENSBTAG00000000683 | 750.3654    | 1.5385 | 0.3674 | 4.1880 | 2.81E-05 | 3.03E-04 |
| ENSBTAG00000009708 | 311.5095    | 1.5328 | 0.2748 | 5.5780 | 2.43E-08 | 5.13E-07 |
| ENSBTAG00000019209 | 1333.8029   | 1.5299 | 0.4334 | 3.5297 | 4.16E-04 | 3.11E-03 |
| ENSBTAG00000026309 | 397.9421    | 1.5266 | 0.3434 | 4.4460 | 8.75E-06 | 1.07E-04 |
| ENSBTAG00000017560 | 437.4656    | 1.5249 | 0.3263 | 4.6731 | 2.97E-06 | 4.07E-05 |
| ENSBTAG00000018718 | 145.9262    | 1.5229 | 0.4362 | 3.4913 | 4.81E-04 | 3.53E-03 |
| ENSBTAG00000018160 | 103838.4761 | 1.5216 | 0.3476 | 4.3770 | 1.20E-05 | 1.43E-04 |
| ENSBTAG00000020266 | 105.8249    | 1.5213 | 0.4562 | 3.3350 | 8.53E-04 | 5.70E-03 |
| ENSBTAG00000002970 | 4927.3491   | 1.5211 | 0.3939 | 3.8617 | 1.13E-04 | 1.02E-03 |
| ENSBTAG00000009886 | 7431.0177   | 1.5154 | 0.4050 | 3.7420 | 1.83E-04 | 1.55E-03 |
| ENSBTAG00000021187 | 12625.5463  | 1.5150 | 0.4748 | 3.1905 | 1.42E-03 | 8.61E-03 |
| ENSBTAG00000009502 | 360.1521    | 1.5107 | 0.3880 | 3.8936 | 9.87E-05 | 9.08E-04 |
| ENSBTAG00000019187 | 2747.3654   | 1.5072 | 0.3098 | 4.8647 | 1.15E-06 | 1.76E-05 |
| ENSBTAG00000012273 | 1757.8867   | 1.5028 | 0.3924 | 3.8301 | 1.28E-04 | 1.14E-03 |
| ENSBTAG00000014020 | 191.2000    | 1.5018 | 0.3624 | 4.1436 | 3.42E-05 | 3.59E-04 |
| ENSBTAG00000010803 | 251.0482    | 1.4998 | 0.3542 | 4.2340 | 2.30E-05 | 2.52E-04 |
| ENSBTAG00000009664 | 351.4431    | 1.4976 | 0.4566 | 3.2796 | 1.04E-03 | 6.69E-03 |
| ENSBTAG00000022808 | 1090.0212   | 1.4960 | 0.3161 | 4.7329 | 2.21E-06 | 3.11E-05 |
| ENSBTAG00000014426 | 4030.2694   | 1.4937 | 0.2376 | 6.2880 | 3.22E-10 | 9.94E-09 |
| ENSBTAG00000009482 | 2324.2180   | 1.4929 | 0.2945 | 5.0688 | 4.00E-07 | 6.78E-06 |
| ENSBTAG00000013544 | 760.3654    | 1.4921 | 0.2701 | 5.5240 | 3.31E-08 | 6.84E-07 |
| ENSBTAG00000001142 | 938.5489    | 1.4912 | 0.2488 | 5.9933 | 2.06E-09 | 5.38E-08 |
| ENSBTAG00000008129 | 351.1641    | 1.4891 | 0.4144 | 3.5937 | 3.26E-04 | 2.52E-03 |
| ENSBTAG00000047739 | 31580.6764  | 1.4877 | 0.3946 | 3.7697 | 1.63E-04 | 1.41E-03 |
| ENSBTAG00000021467 | 531.3820    | 1.4855 | 0.3265 | 4.5504 | 5.35E-06 | 6.88E-05 |
| ENSBTAG00000015936 | 373.1904    | 1.4822 | 0.4679 | 3.1680 | 1.54E-03 | 9.17E-03 |
| ENSBTAG00000046549 | 1149.2300   | 1.4755 | 0.2408 | 6.1263 | 9.00E-10 | 2.50E-08 |
| ENSBTAG00000008732 | 169.1853    | 1.4733 | 0.4506 | 3.2693 | 1.08E-03 | 6.89E-03 |
| ENSBTAG00000012314 | 30017.3816  | 1.4725 | 0.3123 | 4.7154 | 2.41E-06 | 3.37E-05 |
| ENSBTAG00000004977 | 285.3915    | 1.4700 | 0.3528 | 4.1669 | 3.09E-05 | 3.29E-04 |
| ENSBTAG00000019219 | 3617.6295   | 1.4628 | 0.2170 | 6.7400 | 1.58E-11 | 6.03E-10 |
| ENSBTAG00000015226 | 1013.3967   | 1.4591 | 0.3927 | 3.7152 | 2.03E-04 | 1.70E-03 |



|                    |            |        |        |        |          |          |
|--------------------|------------|--------|--------|--------|----------|----------|
| ENSBTAG00000000332 | 708.5445   | 1.4585 | 0.3213 | 4.5392 | 5.65E-06 | 7.22E-05 |
| ENSBTAG00000019116 | 2311.3031  | 1.4563 | 0.2131 | 6.8336 | 8.28E-12 | 3.31E-10 |
| ENSBTAG00000010863 | 3078.8282  | 1.4559 | 0.2359 | 6.1708 | 6.80E-10 | 1.93E-08 |
| ENSBTAG00000006654 | 1780.7979  | 1.4547 | 0.3721 | 3.9095 | 9.25E-05 | 8.56E-04 |
| ENSBTAG00000019604 | 1624.2449  | 1.4498 | 0.4507 | 3.2167 | 1.30E-03 | 8.03E-03 |
| ENSBTAG00000011541 | 861.8666   | 1.4448 | 0.4315 | 3.3485 | 8.13E-04 | 5.50E-03 |
| ENSBTAG00000014522 | 990.2143   | 1.4385 | 0.3146 | 4.5719 | 4.83E-06 | 6.28E-05 |
| ENSBTAG00000000363 | 1078.0847  | 1.4374 | 0.3316 | 4.3343 | 1.46E-05 | 1.71E-04 |
| ENSBTAG00000012112 | 1042.5283  | 1.4374 | 0.3475 | 4.1370 | 3.52E-05 | 3.68E-04 |
| ENSBTAG00000005960 | 5845.8660  | 1.4336 | 0.2691 | 5.3284 | 9.91E-08 | 1.92E-06 |
| ENSBTAG00000016271 | 3763.7557  | 1.4318 | 0.3468 | 4.1286 | 3.65E-05 | 3.79E-04 |
| ENSBTAG00000021894 | 1931.5747  | 1.4289 | 0.2838 | 5.0346 | 4.79E-07 | 7.89E-06 |
| ENSBTAG00000017799 | 2961.9305  | 1.4264 | 0.2556 | 5.5796 | 2.41E-08 | 5.10E-07 |
| ENSBTAG00000045980 | 2059.4593  | 1.4182 | 0.3410 | 4.1589 | 3.20E-05 | 3.39E-04 |
| ENSBTAG00000001634 | 3539.2437  | 1.4175 | 0.3213 | 4.4121 | 1.02E-05 | 1.24E-04 |
| ENSBTAG00000015802 | 3343.0982  | 1.4149 | 0.3359 | 4.2125 | 2.53E-05 | 2.75E-04 |
| ENSBTAG00000002287 | 1906.8353  | 1.4105 | 0.3732 | 3.7791 | 1.57E-04 | 1.36E-03 |
| ENSBTAG00000035907 | 6946.2285  | 1.4102 | 0.2297 | 6.1384 | 8.33E-10 | 2.32E-08 |
| ENSBTAG00000016415 | 2870.4687  | 1.4036 | 0.3721 | 3.7723 | 1.62E-04 | 1.39E-03 |
| ENSBTAG00000003401 | 10964.2503 | 1.4016 | 0.2657 | 5.2742 | 1.33E-07 | 2.52E-06 |
| ENSBTAG00000031861 | 4326.1638  | 1.3996 | 0.2994 | 4.6746 | 2.94E-06 | 4.04E-05 |
| ENSBTAG00000006124 | 1094.1809  | 1.3984 | 0.2810 | 4.9768 | 6.47E-07 | 1.04E-05 |
| ENSBTAG00000015212 | 986.8776   | 1.3979 | 0.3732 | 3.7462 | 1.80E-04 | 1.53E-03 |
| ENSBTAG00000020192 | 5638.0586  | 1.3977 | 0.2468 | 5.6637 | 1.48E-08 | 3.27E-07 |
| ENSBTAG00000040585 | 101.0975   | 1.3937 | 0.4068 | 3.4263 | 6.12E-04 | 4.34E-03 |
| ENSBTAG00000006933 | 3994.3107  | 1.3928 | 0.2905 | 4.7948 | 1.63E-06 | 2.38E-05 |
| ENSBTAG00000020469 | 136.5722   | 1.3912 | 0.4002 | 3.4764 | 5.08E-04 | 3.70E-03 |
| ENSBTAG00000017582 | 295.5784   | 1.3884 | 0.3985 | 3.4841 | 4.94E-04 | 3.61E-03 |
| ENSBTAG00000017764 | 529.0649   | 1.3881 | 0.2695 | 5.1505 | 2.60E-07 | 4.64E-06 |
| ENSBTAG00000017626 | 820.1243   | 1.3851 | 0.2474 | 5.5994 | 2.15E-08 | 4.61E-07 |
| ENSBTAG00000047718 | 100.1063   | 1.3845 | 0.4030 | 3.4353 | 5.92E-04 | 4.22E-03 |
| ENSBTAG00000017542 | 653.1159   | 1.3753 | 0.2787 | 4.9340 | 8.06E-07 | 1.27E-05 |
| ENSBTAG00000026233 | 134.2409   | 1.3689 | 0.4191 | 3.2662 | 1.09E-03 | 6.93E-03 |
| ENSBTAG00000001660 | 859.7483   | 1.3674 | 0.2257 | 6.0591 | 1.37E-09 | 3.71E-08 |
| ENSBTAG00000007543 | 451.8706   | 1.3384 | 0.3170 | 4.2219 | 2.42E-05 | 2.65E-04 |
| ENSBTAG00000007427 | 2297.0026  | 1.3380 | 0.1949 | 6.8644 | 6.68E-12 | 2.69E-10 |
| ENSBTAG00000046255 | 983.9080   | 1.3356 | 0.2777 | 4.8090 | 1.52E-06 | 2.24E-05 |
| ENSBTAG00000021020 | 1888.7092  | 1.3327 | 0.3576 | 3.7272 | 1.94E-04 | 1.63E-03 |
| ENSBTAG00000000937 | 1669.1229  | 1.3321 | 0.2675 | 4.9797 | 6.37E-07 | 1.02E-05 |
| ENSBTAG00000001440 | 2796.0451  | 1.3316 | 0.2883 | 4.6187 | 3.86E-06 | 5.15E-05 |
| ENSBTAG00000046533 | 282.7832   | 1.3310 | 0.3523 | 3.7777 | 1.58E-04 | 1.37E-03 |
| ENSBTAG00000002292 | 26251.1710 | 1.3250 | 0.2209 | 5.9984 | 1.99E-09 | 5.26E-08 |
| ENSBTAG00000039296 | 162.4786   | 1.3239 | 0.4169 | 3.1756 | 1.50E-03 | 8.98E-03 |

|                    |            |        |        |        |          |          |
|--------------------|------------|--------|--------|--------|----------|----------|
| ENSBTAG00000046840 | 1047.9043  | 1.3208 | 0.3668 | 3.6009 | 3.17E-04 | 2.46E-03 |
| ENSBTAG00000023933 | 4565.0385  | 1.3155 | 0.2098 | 6.2691 | 3.63E-10 | 1.11E-08 |
| ENSBTAG00000018694 | 10875.2784 | 1.3151 | 0.3819 | 3.4436 | 5.74E-04 | 4.12E-03 |
| ENSBTAG00000006511 | 402.5110   | 1.3142 | 0.3018 | 4.3551 | 1.33E-05 | 1.57E-04 |
| ENSBTAG00000002176 | 10650.8647 | 1.3135 | 0.3412 | 3.8496 | 1.18E-04 | 1.06E-03 |
| ENSBTAG00000004901 | 731.4075   | 1.3070 | 0.4090 | 3.1960 | 1.39E-03 | 8.51E-03 |
| ENSBTAG00000010763 | 612.9825   | 1.3068 | 0.2945 | 4.4369 | 9.13E-06 | 1.12E-04 |
| ENSBTAG00000012589 | 11023.7504 | 1.3058 | 0.2513 | 5.1962 | 2.03E-07 | 3.70E-06 |
| ENSBTAG00000009704 | 561.1257   | 1.3040 | 0.3327 | 3.9193 | 8.88E-05 | 8.26E-04 |
| ENSBTAG00000047027 | 888.0770   | 1.3037 | 0.3312 | 3.9357 | 8.29E-05 | 7.75E-04 |
| ENSBTAG00000047706 | 1382.8291  | 1.3028 | 0.3822 | 3.4091 | 6.52E-04 | 4.58E-03 |
| ENSBTAG00000010353 | 1127.1353  | 1.2981 | 0.3363 | 3.8601 | 1.13E-04 | 1.02E-03 |
| ENSBTAG00000020166 | 1424.0886  | 1.2975 | 0.2788 | 4.6545 | 3.25E-06 | 4.40E-05 |
| ENSBTAG00000016076 | 354.3457   | 1.2933 | 0.3354 | 3.8558 | 1.15E-04 | 1.04E-03 |
| ENSBTAG00000001749 | 1445.8569  | 1.2828 | 0.3766 | 3.4067 | 6.58E-04 | 4.61E-03 |
| ENSBTAG00000008649 | 373.5299   | 1.2818 | 0.3413 | 3.7553 | 1.73E-04 | 1.48E-03 |
| ENSBTAG00000010149 | 338.9375   | 1.2810 | 0.3891 | 3.2926 | 9.93E-04 | 6.44E-03 |
| ENSBTAG00000019804 | 2896.2646  | 1.2802 | 0.3511 | 3.6461 | 2.66E-04 | 2.13E-03 |
| ENSBTAG00000001483 | 781.6096   | 1.2759 | 0.3916 | 3.2577 | 1.12E-03 | 7.10E-03 |
| ENSBTAG00000045904 | 1587.0267  | 1.2746 | 0.4058 | 3.1406 | 1.69E-03 | 9.93E-03 |
| ENSBTAG00000014927 | 830.8283   | 1.2657 | 0.2788 | 4.5403 | 5.62E-06 | 7.19E-05 |
| ENSBTAG00000009213 | 3078.5686  | 1.2651 | 0.2776 | 4.5576 | 5.17E-06 | 6.68E-05 |
| ENSBTAG00000003325 | 338.6473   | 1.2643 | 0.3503 | 3.6092 | 3.07E-04 | 2.40E-03 |
| ENSBTAG00000007634 | 1159.9481  | 1.2548 | 0.2747 | 4.5673 | 4.94E-06 | 6.42E-05 |
| ENSBTAG00000023867 | 1100.8600  | 1.2531 | 0.2393 | 5.2354 | 1.65E-07 | 3.08E-06 |
| ENSBTAG00000002708 | 1061.9404  | 1.2474 | 0.3045 | 4.0964 | 4.20E-05 | 4.29E-04 |
| ENSBTAG00000010547 | 494.1077   | 1.2473 | 0.3899 | 3.1989 | 1.38E-03 | 8.46E-03 |
| ENSBTAG00000014261 | 4126.4892  | 1.2468 | 0.2875 | 4.3373 | 1.44E-05 | 1.69E-04 |
| ENSBTAG00000046724 | 492.8690   | 1.2465 | 0.3554 | 3.5069 | 4.53E-04 | 3.36E-03 |
| ENSBTAG00000005278 | 1022.0193  | 1.2424 | 0.3802 | 3.2679 | 1.08E-03 | 6.91E-03 |
| ENSBTAG00000033077 | 1164.5001  | 1.2405 | 0.2530 | 4.9028 | 9.45E-07 | 1.47E-05 |
| ENSBTAG00000011287 | 280.9415   | 1.2380 | 0.3183 | 3.8895 | 1.00E-04 | 9.21E-04 |
| ENSBTAG00000024633 | 238.3799   | 1.2374 | 0.3943 | 3.1381 | 1.70E-03 | 9.98E-03 |
| ENSBTAG00000026851 | 1360.0102  | 1.2325 | 0.3860 | 3.1930 | 1.41E-03 | 8.56E-03 |
| ENSBTAG00000012425 | 233.0051   | 1.2233 | 0.3887 | 3.1467 | 1.65E-03 | 9.75E-03 |
| ENSBTAG00000003916 | 1371.9761  | 1.2212 | 0.3397 | 3.5945 | 3.25E-04 | 2.52E-03 |
| ENSBTAG00000001856 | 4839.0509  | 1.2205 | 0.2727 | 4.4757 | 7.62E-06 | 9.47E-05 |
| ENSBTAG00000002048 | 3231.1553  | 1.2203 | 0.2862 | 4.2642 | 2.01E-05 | 2.25E-04 |
| ENSBTAG00000047715 | 1935.4140  | 1.2195 | 0.3118 | 3.9112 | 9.18E-05 | 8.51E-04 |
| ENSBTAG00000032083 | 295.5493   | 1.2181 | 0.2815 | 4.3269 | 1.51E-05 | 1.76E-04 |
| ENSBTAG00000003282 | 245.6628   | 1.2150 | 0.3085 | 3.9390 | 8.18E-05 | 7.68E-04 |
| ENSBTAG00000016908 | 711.5222   | 1.2145 | 0.3095 | 3.9240 | 8.71E-05 | 8.11E-04 |
| ENSBTAG00000000356 | 493.5612   | 1.2101 | 0.3252 | 3.7207 | 1.99E-04 | 1.66E-03 |

|                    |            |        |        |        |          |          |
|--------------------|------------|--------|--------|--------|----------|----------|
| ENSBTAG00000021819 | 2349.3057  | 1.2068 | 0.3672 | 3.2862 | 1.02E-03 | 6.54E-03 |
| ENSBTAG00000017597 | 475.0578   | 1.2047 | 0.3571 | 3.3739 | 7.41E-04 | 5.11E-03 |
| ENSBTAG00000009552 | 5924.4219  | 1.2041 | 0.3713 | 3.2432 | 1.18E-03 | 7.42E-03 |
| ENSBTAG00000010206 | 3368.9013  | 1.2039 | 0.3668 | 3.2817 | 1.03E-03 | 6.64E-03 |
| ENSBTAG00000009785 | 2637.2067  | 1.2024 | 0.2737 | 4.3929 | 1.12E-05 | 1.34E-04 |
| ENSBTAG00000015384 | 1137.5230  | 1.1992 | 0.2814 | 4.2617 | 2.03E-05 | 2.27E-04 |
| ENSBTAG00000005865 | 2143.1183  | 1.1855 | 0.2132 | 5.5603 | 2.69E-08 | 5.64E-07 |
| ENSBTAG00000030587 | 3312.5074  | 1.1853 | 0.3255 | 3.6419 | 2.71E-04 | 2.16E-03 |
| ENSBTAG00000003062 | 752.2512   | 1.1839 | 0.3364 | 3.5187 | 4.34E-04 | 3.23E-03 |
| ENSBTAG00000039662 | 377.3711   | 1.1825 | 0.3614 | 3.2717 | 1.07E-03 | 6.84E-03 |
| ENSBTAG00000010899 | 53517.4797 | 1.1783 | 0.3605 | 3.2688 | 1.08E-03 | 6.90E-03 |
| ENSBTAG00000017694 | 214.2627   | 1.1745 | 0.3688 | 3.1850 | 1.45E-03 | 8.74E-03 |
| ENSBTAG00000020030 | 10118.9515 | 1.1737 | 0.3363 | 3.4906 | 4.82E-04 | 3.54E-03 |
| ENSBTAG00000016619 | 483.5020   | 1.1728 | 0.3233 | 3.6274 | 2.86E-04 | 2.26E-03 |
| ENSBTAG00000000744 | 1674.8921  | 1.1698 | 0.3230 | 3.6219 | 2.92E-04 | 2.30E-03 |
| ENSBTAG00000005826 | 225.8041   | 1.1615 | 0.3326 | 3.4918 | 4.80E-04 | 3.53E-03 |
| ENSBTAG00000011597 | 1692.9017  | 1.1595 | 0.2873 | 4.0365 | 5.43E-05 | 5.36E-04 |
| ENSBTAG00000006002 | 1291.9001  | 1.1573 | 0.2803 | 4.1289 | 3.65E-05 | 3.79E-04 |
| ENSBTAG00000021582 | 2608.5169  | 1.1512 | 0.2528 | 4.5546 | 5.25E-06 | 6.75E-05 |
| ENSBTAG00000020681 | 1100.4932  | 1.1493 | 0.3478 | 3.3045 | 9.52E-04 | 6.22E-03 |
| ENSBTAG00000019938 | 648.1729   | 1.1479 | 0.3483 | 3.2955 | 9.82E-04 | 6.38E-03 |
| ENSBTAG00000021008 | 3024.1820  | 1.1435 | 0.3434 | 3.3299 | 8.69E-04 | 5.78E-03 |
| ENSBTAG00000000108 | 1288.0230  | 1.1418 | 0.3409 | 3.3493 | 8.10E-04 | 5.49E-03 |
| ENSBTAG00000012999 | 533.3731   | 1.1405 | 0.3431 | 3.3237 | 8.88E-04 | 5.88E-03 |
| ENSBTAG00000000786 | 726.8882   | 1.1326 | 0.3074 | 3.6850 | 2.29E-04 | 1.88E-03 |
| ENSBTAG00000013138 | 604.4065   | 1.1293 | 0.3247 | 3.4783 | 5.05E-04 | 3.68E-03 |
| ENSBTAG00000014884 | 2906.5403  | 1.1271 | 0.2333 | 4.8305 | 1.36E-06 | 2.03E-05 |
| ENSBTAG00000003264 | 2635.4317  | 1.1255 | 0.2826 | 3.9826 | 6.82E-05 | 6.57E-04 |
| ENSBTAG00000017211 | 444.0645   | 1.1215 | 0.3214 | 3.4892 | 4.85E-04 | 3.56E-03 |
| ENSBTAG00000006616 | 836.9563   | 1.1213 | 0.3221 | 3.4810 | 5.00E-04 | 3.65E-03 |
| ENSBTAG00000032674 | 718.3819   | 1.1203 | 0.3025 | 3.7038 | 2.12E-04 | 1.76E-03 |
| ENSBTAG00000017958 | 647.3346   | 1.1198 | 0.2445 | 4.5797 | 4.66E-06 | 6.08E-05 |
| ENSBTAG00000026716 | 2879.8581  | 1.1195 | 0.2265 | 4.9428 | 7.70E-07 | 1.21E-05 |
| ENSBTAG00000002175 | 1765.2766  | 1.1193 | 0.3040 | 3.6820 | 2.31E-04 | 1.90E-03 |
| ENSBTAG00000016104 | 1662.8401  | 1.1185 | 0.2748 | 4.0695 | 4.71E-05 | 4.73E-04 |
| ENSBTAG00000004497 | 1291.4429  | 1.1171 | 0.2297 | 4.8630 | 1.16E-06 | 1.77E-05 |
| ENSBTAG00000020332 | 2782.0521  | 1.1148 | 0.3054 | 3.6499 | 2.62E-04 | 2.10E-03 |
| ENSBTAG00000020417 | 2053.2235  | 1.1142 | 0.2678 | 4.1606 | 3.17E-05 | 3.37E-04 |
| ENSBTAG00000009267 | 703.8997   | 1.1140 | 0.3297 | 3.3783 | 7.29E-04 | 5.04E-03 |
| ENSBTAG00000018383 | 241.5042   | 1.1130 | 0.3148 | 3.5355 | 4.07E-04 | 3.05E-03 |
| ENSBTAG00000019202 | 1233.6131  | 1.1114 | 0.2500 | 4.4463 | 8.74E-06 | 1.07E-04 |
| ENSBTAG00000013699 | 3776.8663  | 1.1112 | 0.2867 | 3.8762 | 1.06E-04 | 9.67E-04 |
| ENSBTAG00000010178 | 2427.4077  | 1.1096 | 0.2982 | 3.7208 | 1.99E-04 | 1.66E-03 |

|                    |            |        |        |        |          |          |
|--------------------|------------|--------|--------|--------|----------|----------|
| ENSBTAG00000009415 | 526.1019   | 1.1090 | 0.3040 | 3.6477 | 2.65E-04 | 2.12E-03 |
| ENSBTAG00000021980 | 382.9260   | 1.1085 | 0.3257 | 3.4032 | 6.66E-04 | 4.65E-03 |
| ENSBTAG00000005847 | 1405.5212  | 1.1078 | 0.3320 | 3.3361 | 8.50E-04 | 5.69E-03 |
| ENSBTAG00000013612 | 814.6898   | 1.1059 | 0.3198 | 3.4585 | 5.43E-04 | 3.93E-03 |
| ENSBTAG00000021134 | 2013.5382  | 1.1055 | 0.3055 | 3.6190 | 2.96E-04 | 2.32E-03 |
| ENSBTAG00000003399 | 17297.4869 | 1.1037 | 0.2314 | 4.7703 | 1.84E-06 | 2.63E-05 |
| ENSBTAG00000001518 | 1628.0862  | 1.1037 | 0.2473 | 4.4631 | 8.08E-06 | 1.00E-04 |
| ENSBTAG00000031609 | 1361.1497  | 1.1032 | 0.2564 | 4.3031 | 1.68E-05 | 1.93E-04 |
| ENSBTAG00000025516 | 1653.5239  | 1.0979 | 0.3012 | 3.6451 | 2.67E-04 | 2.14E-03 |
| ENSBTAG00000000184 | 3636.4448  | 1.0936 | 0.1965 | 5.5657 | 2.61E-08 | 5.48E-07 |
| ENSBTAG00000046545 | 1519.5089  | 1.0920 | 0.2453 | 4.4516 | 8.52E-06 | 1.05E-04 |
| ENSBTAG00000033170 | 236.3885   | 1.0906 | 0.3437 | 3.1733 | 1.51E-03 | 9.03E-03 |
| ENSBTAG00000003708 | 5229.9581  | 1.0878 | 0.3261 | 3.3359 | 8.50E-04 | 5.69E-03 |
| ENSBTAG00000019538 | 2770.7396  | 1.0854 | 0.2696 | 4.0255 | 5.69E-05 | 5.60E-04 |
| ENSBTAG00000016572 | 472.9355   | 1.0843 | 0.2963 | 3.6599 | 2.52E-04 | 2.04E-03 |
| ENSBTAG00000013782 | 996.5061   | 1.0840 | 0.3153 | 3.4378 | 5.86E-04 | 4.20E-03 |
| ENSBTAG00000007186 | 365.2627   | 1.0833 | 0.3326 | 3.2570 | 1.13E-03 | 7.11E-03 |
| ENSBTAG00000000957 | 1068.1589  | 1.0800 | 0.2833 | 3.8124 | 1.38E-04 | 1.22E-03 |
| ENSBTAG00000011895 | 966.2639   | 1.0794 | 0.3207 | 3.3653 | 7.65E-04 | 5.25E-03 |
| ENSBTAG00000008695 | 1649.8417  | 1.0776 | 0.3136 | 3.4358 | 5.91E-04 | 4.22E-03 |
| ENSBTAG00000010013 | 5113.5628  | 1.0742 | 0.2281 | 4.7096 | 2.48E-06 | 3.46E-05 |
| ENSBTAG00000019495 | 579.7258   | 1.0719 | 0.3021 | 3.5484 | 3.88E-04 | 2.93E-03 |
| ENSBTAG00000002291 | 486.7567   | 1.0678 | 0.2880 | 3.7077 | 2.09E-04 | 1.74E-03 |
| ENSBTAG00000018898 | 707.5726   | 1.0675 | 0.2846 | 3.7507 | 1.76E-04 | 1.51E-03 |
| ENSBTAG00000016733 | 653.1007   | 1.0665 | 0.2610 | 4.0864 | 4.38E-05 | 4.45E-04 |
| ENSBTAG00000021573 | 5123.1555  | 1.0662 | 0.2577 | 4.1374 | 3.51E-05 | 3.68E-04 |
| ENSBTAG00000047428 | 753.7068   | 1.0661 | 0.3194 | 3.3373 | 8.46E-04 | 5.68E-03 |
| ENSBTAG00000009271 | 804.7538   | 1.0586 | 0.2878 | 3.6786 | 2.35E-04 | 1.92E-03 |
| ENSBTAG00000009378 | 674.7399   | 1.0585 | 0.3127 | 3.3848 | 7.12E-04 | 4.94E-03 |
| ENSBTAG00000037457 | 3261.8375  | 1.0555 | 0.3086 | 3.4204 | 6.25E-04 | 4.42E-03 |
| ENSBTAG00000035230 | 1465.5874  | 1.0552 | 0.2424 | 4.3539 | 1.34E-05 | 1.58E-04 |
| ENSBTAG00000019197 | 2197.9557  | 1.0532 | 0.3130 | 3.3653 | 7.65E-04 | 5.25E-03 |
| ENSBTAG00000001529 | 2074.7976  | 1.0521 | 0.2400 | 4.3831 | 1.17E-05 | 1.40E-04 |
| ENSBTAG00000031134 | 3158.3643  | 1.0499 | 0.2911 | 3.6065 | 3.10E-04 | 2.42E-03 |
| ENSBTAG00000010784 | 1514.6158  | 1.0472 | 0.2138 | 4.8969 | 9.74E-07 | 1.51E-05 |
| ENSBTAG00000034978 | 4322.1190  | 1.0458 | 0.3034 | 3.4472 | 5.67E-04 | 4.08E-03 |
| ENSBTAG00000006072 | 4091.6381  | 1.0447 | 0.2869 | 3.6409 | 2.72E-04 | 2.17E-03 |
| ENSBTAG00000046625 | 173.9781   | 1.0365 | 0.3176 | 3.2632 | 1.10E-03 | 6.99E-03 |
| ENSBTAG00000011415 | 5401.5826  | 1.0359 | 0.1974 | 5.2476 | 1.54E-07 | 2.89E-06 |
| ENSBTAG00000008854 | 810.8375   | 1.0346 | 0.2506 | 4.1292 | 3.64E-05 | 3.79E-04 |
| ENSBTAG00000012890 | 17504.5391 | 1.0338 | 0.2648 | 3.9040 | 9.46E-05 | 8.74E-04 |
| ENSBTAG00000001666 | 379.8340   | 1.0337 | 0.3090 | 3.3459 | 8.20E-04 | 5.54E-03 |
| ENSBTAG00000007061 | 1572.1154  | 1.0311 | 0.2423 | 4.2550 | 2.09E-05 | 2.34E-04 |

|                    |           |         |        |         |          |          |
|--------------------|-----------|---------|--------|---------|----------|----------|
| ENSBTAG00000011067 | 1408.7989 | 1.0280  | 0.3177 | 3.2352  | 1.22E-03 | 7.59E-03 |
| ENSBTAG00000016367 | 1053.0844 | 1.0272  | 0.2148 | 4.7829  | 1.73E-06 | 2.51E-05 |
| ENSBTAG00000004496 | 3877.6234 | 1.0246  | 0.2666 | 3.8433  | 1.21E-04 | 1.09E-03 |
| ENSBTAG00000016592 | 393.4910  | 1.0245  | 0.2890 | 3.5451  | 3.92E-04 | 2.96E-03 |
| ENSBTAG00000015554 | 1584.6005 | 1.0244  | 0.2786 | 3.6768  | 2.36E-04 | 1.93E-03 |
| ENSBTAG00000007935 | 3691.1501 | 1.0145  | 0.2093 | 4.8472  | 1.25E-06 | 1.89E-05 |
| ENSBTAG00000013259 | 1990.5844 | 1.0131  | 0.2716 | 3.7303  | 1.91E-04 | 1.61E-03 |
| ENSBTAG00000010810 | 1655.8366 | 1.0122  | 0.2784 | 3.6351  | 2.78E-04 | 2.20E-03 |
| ENSBTAG00000020655 | 2480.8057 | 1.0112  | 0.2228 | 4.5376  | 5.69E-06 | 7.26E-05 |
| ENSBTAG00000010951 | 641.2116  | 1.0078  | 0.3006 | 3.3527  | 8.00E-04 | 5.44E-03 |
| ENSBTAG00000019133 | 2456.0281 | 1.0015  | 0.1960 | 5.1087  | 3.24E-07 | 5.62E-06 |
| ENSBTAG00000009888 | 798.4222  | -1.0003 | 0.2846 | -3.5144 | 4.41E-04 | 3.28E-03 |
| ENSBTAG00000011136 | 799.9974  | -1.0011 | 0.3135 | -3.1935 | 1.41E-03 | 8.55E-03 |
| ENSBTAG00000040132 | 503.3164  | -1.0063 | 0.3157 | -3.1877 | 1.43E-03 | 8.68E-03 |
| ENSBTAG00000009611 | 627.1732  | -1.0104 | 0.2979 | -3.3920 | 6.94E-04 | 4.82E-03 |
| ENSBTAG00000015392 | 648.7636  | -1.0116 | 0.2588 | -3.9082 | 9.30E-05 | 8.60E-04 |
| ENSBTAG00000009263 | 1150.4658 | -1.0118 | 0.2929 | -3.4540 | 5.52E-04 | 3.99E-03 |
| ENSBTAG00000014015 | 1145.4513 | -1.0121 | 0.3096 | -3.2696 | 1.08E-03 | 6.88E-03 |
| ENSBTAG00000014779 | 4070.1079 | -1.0144 | 0.2856 | -3.5524 | 3.82E-04 | 2.89E-03 |
| ENSBTAG00000027764 | 2648.0042 | -1.0146 | 0.2728 | -3.7186 | 2.00E-04 | 1.68E-03 |
| ENSBTAG00000014553 | 4378.5831 | -1.0156 | 0.2580 | -3.9358 | 8.29E-05 | 7.75E-04 |
| ENSBTAG00000001950 | 1185.8056 | -1.0172 | 0.2433 | -4.1814 | 2.90E-05 | 3.11E-04 |
| ENSBTAG00000030172 | 2582.7174 | -1.0205 | 0.2353 | -4.3378 | 1.44E-05 | 1.69E-04 |
| ENSBTAG00000012024 | 541.4947  | -1.0229 | 0.3025 | -3.3818 | 7.20E-04 | 4.98E-03 |
| ENSBTAG00000007315 | 1027.3436 | -1.0236 | 0.3096 | -3.3060 | 9.46E-04 | 6.19E-03 |
| ENSBTAG00000030839 | 1857.1534 | -1.0248 | 0.2278 | -4.4982 | 6.85E-06 | 8.61E-05 |
| ENSBTAG00000004328 | 2443.0018 | -1.0254 | 0.2973 | -3.4487 | 5.63E-04 | 4.06E-03 |
| ENSBTAG00000006644 | 6573.7368 | -1.0267 | 0.3007 | -3.4145 | 6.39E-04 | 4.50E-03 |
| ENSBTAG00000039916 | 8464.8794 | -1.0278 | 0.3191 | -3.2214 | 1.28E-03 | 7.91E-03 |
| ENSBTAG00000025452 | 2236.4103 | -1.0282 | 0.2902 | -3.5431 | 3.96E-04 | 2.98E-03 |
| ENSBTAG00000005787 | 629.5612  | -1.0319 | 0.3281 | -3.1450 | 1.66E-03 | 9.80E-03 |
| ENSBTAG00000012723 | 407.3706  | -1.0321 | 0.2946 | -3.5040 | 4.58E-04 | 3.39E-03 |
| ENSBTAG00000019780 | 2749.3173 | -1.0325 | 0.2435 | -4.2396 | 2.24E-05 | 2.47E-04 |
| ENSBTAG00000007149 | 2402.9427 | -1.0339 | 0.3009 | -3.4356 | 5.91E-04 | 4.22E-03 |
| ENSBTAG00000043956 | 888.1699  | -1.0343 | 0.2877 | -3.5947 | 3.25E-04 | 2.52E-03 |
| ENSBTAG00000004430 | 695.1325  | -1.0361 | 0.2756 | -3.7600 | 1.70E-04 | 1.46E-03 |
| ENSBTAG00000016501 | 1795.7944 | -1.0405 | 0.2517 | -4.1334 | 3.57E-05 | 3.73E-04 |
| ENSBTAG00000003469 | 1554.3413 | -1.0405 | 0.2910 | -3.5753 | 3.50E-04 | 2.68E-03 |
| ENSBTAG00000015611 | 2560.9257 | -1.0437 | 0.2398 | -4.3524 | 1.35E-05 | 1.59E-04 |
| ENSBTAG00000005448 | 709.4574  | -1.0476 | 0.2955 | -3.5458 | 3.91E-04 | 2.95E-03 |
| ENSBTAG00000019828 | 353.4147  | -1.0502 | 0.2806 | -3.7428 | 1.82E-04 | 1.55E-03 |
| ENSBTAG00000009928 | 806.2952  | -1.0513 | 0.2973 | -3.5360 | 4.06E-04 | 3.05E-03 |
| ENSBTAG00000017161 | 1583.5408 | -1.0528 | 0.2167 | -4.8574 | 1.19E-06 | 1.82E-05 |

|                     |            |         |        |         |          |          |
|---------------------|------------|---------|--------|---------|----------|----------|
| ENSBTAG00000015734  | 693.0611   | -1.0535 | 0.2883 | -3.6545 | 2.58E-04 | 2.07E-03 |
| ENSBTAG00000003679  | 642.9310   | -1.0609 | 0.2954 | -3.5913 | 3.29E-04 | 2.54E-03 |
| ENSBTAG00000012789  | 2400.1347  | -1.0635 | 0.3043 | -3.4950 | 4.74E-04 | 3.49E-03 |
| ENSBTAG00000025589  | 399.8222   | -1.0664 | 0.2945 | -3.6214 | 2.93E-04 | 2.30E-03 |
| ENSBTAG00000019274  | 2549.9252  | -1.0699 | 0.2801 | -3.8202 | 1.33E-04 | 1.18E-03 |
| ENSBTAG00000003746  | 2997.8210  | -1.0702 | 0.2603 | -4.1113 | 3.93E-05 | 4.05E-04 |
| ENSBTAG00000006663  | 1484.6330  | -1.0706 | 0.2998 | -3.5715 | 3.55E-04 | 2.72E-03 |
| ENSBTAG00000001780  | 490.1634   | -1.0740 | 0.2941 | -3.6524 | 2.60E-04 | 2.09E-03 |
| ENSBTAG00000013096  | 1076.6496  | -1.0764 | 0.2196 | -4.9004 | 9.56E-07 | 1.49E-05 |
| ENSBTAG00000013781  | 514.5503   | -1.0810 | 0.2721 | -3.9723 | 7.12E-05 | 6.82E-04 |
| ENSBTAG00000014377  | 7797.1152  | -1.0834 | 0.2461 | -4.4016 | 1.07E-05 | 1.29E-04 |
| ENSBTAG00000008730  | 305.6100   | -1.0844 | 0.3138 | -3.4558 | 5.49E-04 | 3.97E-03 |
| ENSBTAG00000001036  | 2229.3621  | -1.0894 | 0.2431 | -4.4813 | 7.42E-06 | 9.26E-05 |
| ENSBTAG00000017074  | 407.7327   | -1.0899 | 0.3004 | -3.6282 | 2.85E-04 | 2.25E-03 |
| ENSBTAG00000014454  | 1287.2913  | -1.0906 | 0.2137 | -5.1030 | 3.34E-07 | 5.77E-06 |
| ENSBTAG00000013244  | 1853.6904  | -1.0911 | 0.2588 | -4.2155 | 2.49E-05 | 2.72E-04 |
| ENSBTAG000000039161 | 3217.0186  | -1.0918 | 0.2001 | -5.4555 | 4.88E-08 | 9.84E-07 |
| ENSBTAG00000004922  | 1532.0626  | -1.0959 | 0.3168 | -3.4594 | 5.41E-04 | 3.92E-03 |
| ENSBTAG00000018116  | 377.8324   | -1.0971 | 0.3251 | -3.3742 | 7.40E-04 | 5.11E-03 |
| ENSBTAG00000012582  | 5806.5387  | -1.1002 | 0.2665 | -4.1281 | 3.66E-05 | 3.79E-04 |
| ENSBTAG00000000026  | 532.0157   | -1.1002 | 0.2752 | -3.9980 | 6.39E-05 | 6.19E-04 |
| ENSBTAG00000006034  | 471.7987   | -1.1016 | 0.3479 | -3.1670 | 1.54E-03 | 9.20E-03 |
| ENSBTAG00000015117  | 285.2794   | -1.1033 | 0.3495 | -3.1571 | 1.59E-03 | 9.46E-03 |
| ENSBTAG00000003885  | 765.9620   | -1.1055 | 0.2562 | -4.3145 | 1.60E-05 | 1.85E-04 |
| ENSBTAG00000022167  | 501.2489   | -1.1063 | 0.2503 | -4.4198 | 9.88E-06 | 1.20E-04 |
| ENSBTAG00000022294  | 2091.4681  | -1.1106 | 0.2726 | -4.0738 | 4.63E-05 | 4.65E-04 |
| ENSBTAG00000000056  | 720.5330   | -1.1143 | 0.2654 | -4.1992 | 2.68E-05 | 2.90E-04 |
| ENSBTAG00000015602  | 162.9813   | -1.1152 | 0.3333 | -3.3458 | 8.20E-04 | 5.54E-03 |
| ENSBTAG000000036262 | 1148.6243  | -1.1167 | 0.2741 | -4.0748 | 4.61E-05 | 4.65E-04 |
| ENSBTAG00000026199  | 66012.1948 | -1.1183 | 0.3232 | -3.4606 | 5.39E-04 | 3.90E-03 |
| ENSBTAG00000005617  | 130.9831   | -1.1186 | 0.3470 | -3.2236 | 1.27E-03 | 7.86E-03 |
| ENSBTAG00000009813  | 3660.8827  | -1.1198 | 0.2457 | -4.5566 | 5.20E-06 | 6.70E-05 |
| ENSBTAG00000016349  | 896.8558   | -1.1200 | 0.3162 | -3.5420 | 3.97E-04 | 2.99E-03 |
| ENSBTAG00000004631  | 547.9909   | -1.1213 | 0.2654 | -4.2250 | 2.39E-05 | 2.61E-04 |
| ENSBTAG00000012490  | 2122.1292  | -1.1220 | 0.3105 | -3.6131 | 3.03E-04 | 2.37E-03 |
| ENSBTAG000000033412 | 402.2951   | -1.1235 | 0.3269 | -3.4369 | 5.88E-04 | 4.21E-03 |
| ENSBTAG00000014170  | 938.7345   | -1.1243 | 0.3536 | -3.1795 | 1.48E-03 | 8.88E-03 |
| ENSBTAG00000005635  | 243.3542   | -1.1258 | 0.3491 | -3.2250 | 1.26E-03 | 7.83E-03 |
| ENSBTAG00000014729  | 1087.5572  | -1.1275 | 0.2566 | -4.3935 | 1.12E-05 | 1.34E-04 |
| ENSBTAG00000005683  | 625.8445   | -1.1346 | 0.2987 | -3.7990 | 1.45E-04 | 1.27E-03 |
| ENSBTAG00000016240  | 487.8972   | -1.1364 | 0.3170 | -3.5845 | 3.38E-04 | 2.60E-03 |
| ENSBTAG00000004907  | 1354.1849  | -1.1412 | 0.2351 | -4.8533 | 1.21E-06 | 1.85E-05 |
| ENSBTAG00000016369  | 606.3103   | -1.1446 | 0.3480 | -3.2888 | 1.01E-03 | 6.50E-03 |

|                    |            |         |        |         |          |          |
|--------------------|------------|---------|--------|---------|----------|----------|
| ENSBTAG00000011108 | 507.4691   | -1.1472 | 0.3438 | -3.3363 | 8.49E-04 | 5.69E-03 |
| ENSBTAG00000007013 | 227.1343   | -1.1502 | 0.3428 | -3.3554 | 7.92E-04 | 5.40E-03 |
| ENSBTAG00000044150 | 508.7437   | -1.1502 | 0.3363 | -3.4204 | 6.25E-04 | 4.42E-03 |
| ENSBTAG00000009855 | 3461.9400  | -1.1526 | 0.2796 | -4.1224 | 3.75E-05 | 3.88E-04 |
| ENSBTAG00000002714 | 545.1648   | -1.1529 | 0.3203 | -3.5992 | 3.19E-04 | 2.48E-03 |
| ENSBTAG00000010132 | 644.0699   | -1.1546 | 0.3085 | -3.7431 | 1.82E-04 | 1.54E-03 |
| ENSBTAG00000013287 | 3017.6181  | -1.1547 | 0.3618 | -3.1916 | 1.41E-03 | 8.59E-03 |
| ENSBTAG00000019419 | 1650.8824  | -1.1549 | 0.3022 | -3.8215 | 1.33E-04 | 1.18E-03 |
| ENSBTAG00000009698 | 2249.5292  | -1.1559 | 0.2687 | -4.3020 | 1.69E-05 | 1.94E-04 |
| ENSBTAG00000002073 | 1030.3226  | -1.1581 | 0.2553 | -4.5369 | 5.71E-06 | 7.28E-05 |
| ENSBTAG00000013414 | 4672.8644  | -1.1602 | 0.3601 | -3.2221 | 1.27E-03 | 7.90E-03 |
| ENSBTAG00000014417 | 721.4464   | -1.1623 | 0.3639 | -3.1936 | 1.41E-03 | 8.55E-03 |
| ENSBTAG00000003589 | 565.3844   | -1.1627 | 0.3118 | -3.7286 | 1.93E-04 | 1.62E-03 |
| ENSBTAG00000009374 | 803.5970   | -1.1657 | 0.2937 | -3.9694 | 7.21E-05 | 6.89E-04 |
| ENSBTAG00000013465 | 737.8764   | -1.1676 | 0.3631 | -3.2156 | 1.30E-03 | 8.05E-03 |
| ENSBTAG00000007147 | 311.3780   | -1.1710 | 0.3289 | -3.5607 | 3.70E-04 | 2.81E-03 |
| ENSBTAG00000020617 | 2168.1190  | -1.1711 | 0.3088 | -3.7920 | 1.49E-04 | 1.30E-03 |
| ENSBTAG00000012272 | 1173.2763  | -1.1713 | 0.3070 | -3.8155 | 1.36E-04 | 1.20E-03 |
| ENSBTAG00000013726 | 520.6401   | -1.1722 | 0.3593 | -3.2622 | 1.11E-03 | 7.01E-03 |
| ENSBTAG00000009127 | 1904.5212  | -1.1762 | 0.2907 | -4.0454 | 5.22E-05 | 5.18E-04 |
| ENSBTAG00000007364 | 146.4769   | -1.1773 | 0.3479 | -3.3843 | 7.14E-04 | 4.95E-03 |
| ENSBTAG00000007271 | 331.2024   | -1.1819 | 0.3139 | -3.7656 | 1.66E-04 | 1.43E-03 |
| ENSBTAG00000015490 | 269.9353   | -1.1830 | 0.3554 | -3.3289 | 8.72E-04 | 5.79E-03 |
| ENSBTAG00000010460 | 4409.3655  | -1.1861 | 0.3291 | -3.6043 | 3.13E-04 | 2.44E-03 |
| ENSBTAG00000018041 | 1560.7341  | -1.1869 | 0.2375 | -4.9972 | 5.82E-07 | 9.44E-06 |
| ENSBTAG00000000371 | 2222.5727  | -1.1911 | 0.2596 | -4.5880 | 4.48E-06 | 5.87E-05 |
| ENSBTAG00000040338 | 28274.7900 | -1.1932 | 0.3574 | -3.3390 | 8.41E-04 | 5.66E-03 |
| ENSBTAG00000013274 | 313.3984   | -1.1968 | 0.3397 | -3.5228 | 4.27E-04 | 3.19E-03 |
| ENSBTAG00000020646 | 278.1602   | -1.1977 | 0.3653 | -3.2786 | 1.04E-03 | 6.70E-03 |
| ENSBTAG00000016969 | 872.9898   | -1.1983 | 0.2617 | -4.5786 | 4.68E-06 | 6.11E-05 |
| ENSBTAG00000004203 | 600.6900   | -1.2000 | 0.2546 | -4.7129 | 2.44E-06 | 3.41E-05 |
| ENSBTAG00000017082 | 13294.4217 | -1.2003 | 0.3699 | -3.2453 | 1.17E-03 | 7.37E-03 |
| ENSBTAG00000001551 | 609.8057   | -1.2039 | 0.3684 | -3.2681 | 1.08E-03 | 6.91E-03 |
| ENSBTAG00000043961 | 974.9219   | -1.2050 | 0.3135 | -3.8431 | 1.21E-04 | 1.09E-03 |
| ENSBTAG00000030175 | 714.6352   | -1.2069 | 0.2754 | -4.3817 | 1.18E-05 | 1.41E-04 |
| ENSBTAG00000013663 | 1051.4599  | -1.2088 | 0.3214 | -3.7613 | 1.69E-04 | 1.45E-03 |
| ENSBTAG00000012511 | 1026.1653  | -1.2097 | 0.3528 | -3.4285 | 6.07E-04 | 4.31E-03 |
| ENSBTAG00000021658 | 413.6447   | -1.2100 | 0.3759 | -3.2186 | 1.29E-03 | 7.98E-03 |
| ENSBTAG00000008222 | 200.2928   | -1.2104 | 0.3348 | -3.6153 | 3.00E-04 | 2.35E-03 |
| ENSBTAG00000019217 | 1181.9056  | -1.2106 | 0.2546 | -4.7546 | 1.99E-06 | 2.83E-05 |
| ENSBTAG00000003491 | 223.1893   | -1.2139 | 0.3506 | -3.4620 | 5.36E-04 | 3.89E-03 |
| ENSBTAG00000019177 | 910.1197   | -1.2143 | 0.3468 | -3.5019 | 4.62E-04 | 3.41E-03 |
| ENSBTAG00000012982 | 509.3225   | -1.2149 | 0.2603 | -4.6668 | 3.06E-06 | 4.18E-05 |

|                    |            |         |        |         |          |          |
|--------------------|------------|---------|--------|---------|----------|----------|
| ENSBTAG00000010867 | 1192.0213  | -1.2225 | 0.2073 | -5.8980 | 3.68E-09 | 9.06E-08 |
| ENSBTAG00000038620 | 761.7442   | -1.2237 | 0.2300 | -5.3195 | 1.04E-07 | 2.00E-06 |
| ENSBTAG00000013311 | 573.8566   | -1.2239 | 0.3494 | -3.5033 | 4.59E-04 | 3.40E-03 |
| ENSBTAG00000001847 | 270.1388   | -1.2239 | 0.3897 | -3.1404 | 1.69E-03 | 9.93E-03 |
| ENSBTAG00000012940 | 279.0856   | -1.2246 | 0.3678 | -3.3298 | 8.69E-04 | 5.78E-03 |
| ENSBTAG00000021586 | 207.5915   | -1.2276 | 0.3690 | -3.3264 | 8.80E-04 | 5.84E-03 |
| ENSBTAG00000012012 | 1968.1751  | -1.2280 | 0.2954 | -4.1565 | 3.23E-05 | 3.43E-04 |
| ENSBTAG00000016967 | 1120.6687  | -1.2280 | 0.2992 | -4.1038 | 4.06E-05 | 4.17E-04 |
| ENSBTAG00000000899 | 879.1412   | -1.2292 | 0.3704 | -3.3188 | 9.04E-04 | 5.96E-03 |
| ENSBTAG00000043581 | 579.1582   | -1.2294 | 0.3589 | -3.4256 | 6.13E-04 | 4.35E-03 |
| ENSBTAG00000016139 | 17065.3704 | -1.2322 | 0.3483 | -3.5377 | 4.04E-04 | 3.03E-03 |
| ENSBTAG00000003718 | 266.8764   | -1.2382 | 0.2901 | -4.2681 | 1.97E-05 | 2.21E-04 |
| ENSBTAG00000013489 | 766.1573   | -1.2396 | 0.3401 | -3.6447 | 2.68E-04 | 2.14E-03 |
| ENSBTAG00000002813 | 1120.7326  | -1.2421 | 0.2792 | -4.4480 | 8.67E-06 | 1.07E-04 |
| ENSBTAG00000018690 | 2319.0062  | -1.2428 | 0.2795 | -4.4472 | 8.70E-06 | 1.07E-04 |
| ENSBTAG00000003813 | 378.9314   | -1.2469 | 0.3333 | -3.7414 | 1.83E-04 | 1.55E-03 |
| ENSBTAG00000017662 | 953.0755   | -1.2475 | 0.3442 | -3.6243 | 2.90E-04 | 2.28E-03 |
| ENSBTAG00000020642 | 898.1267   | -1.2512 | 0.2833 | -4.4167 | 1.00E-05 | 1.22E-04 |
| ENSBTAG00000011709 | 434.7218   | -1.2557 | 0.3131 | -4.0107 | 6.05E-05 | 5.93E-04 |
| ENSBTAG00000038691 | 1206.9780  | -1.2589 | 0.2379 | -5.2910 | 1.22E-07 | 2.31E-06 |
| ENSBTAG00000009022 | 405.4926   | -1.2601 | 0.3320 | -3.7951 | 1.48E-04 | 1.29E-03 |
| ENSBTAG00000019615 | 1170.7361  | -1.2603 | 0.2447 | -5.1494 | 2.61E-07 | 4.65E-06 |
| ENSBTAG00000032961 | 6391.9255  | -1.2623 | 0.2021 | -6.2472 | 4.18E-10 | 1.25E-08 |
| ENSBTAG00000001364 | 249.6468   | -1.2655 | 0.3811 | -3.3205 | 8.99E-04 | 5.94E-03 |
| ENSBTAG00000020498 | 2394.6294  | -1.2663 | 0.2736 | -4.6273 | 3.70E-06 | 4.97E-05 |
| ENSBTAG00000018796 | 675.8044   | -1.2665 | 0.3302 | -3.8360 | 1.25E-04 | 1.12E-03 |
| ENSBTAG00000010698 | 479.1501   | -1.2668 | 0.3460 | -3.6613 | 2.51E-04 | 2.03E-03 |
| ENSBTAG00000032852 | 198.7170   | -1.2693 | 0.3791 | -3.3481 | 8.14E-04 | 5.51E-03 |
| ENSBTAG00000004064 | 600.8401   | -1.2701 | 0.3631 | -3.4980 | 4.69E-04 | 3.45E-03 |
| ENSBTAG00000004790 | 282.8256   | -1.2712 | 0.2962 | -4.2920 | 1.77E-05 | 2.01E-04 |
| ENSBTAG00000006995 | 4832.4662  | -1.2715 | 0.3720 | -3.4178 | 6.31E-04 | 4.46E-03 |
| ENSBTAG00000018971 | 167.1342   | -1.2735 | 0.3823 | -3.3314 | 8.64E-04 | 5.76E-03 |
| ENSBTAG00000018415 | 642.6062   | -1.2748 | 0.3736 | -3.4123 | 6.44E-04 | 4.53E-03 |
| ENSBTAG00000014923 | 1017.0703  | -1.2767 | 0.2728 | -4.6792 | 2.88E-06 | 3.96E-05 |
| ENSBTAG00000012126 | 315.4053   | -1.2795 | 0.3600 | -3.5544 | 3.79E-04 | 2.87E-03 |
| ENSBTAG00000014007 | 1303.8847  | -1.2868 | 0.2523 | -5.1009 | 3.38E-07 | 5.83E-06 |
| ENSBTAG00000000501 | 366.5225   | -1.2890 | 0.3076 | -4.1905 | 2.78E-05 | 3.00E-04 |
| ENSBTAG00000012632 | 8902.1169  | -1.2921 | 0.3998 | -3.2315 | 1.23E-03 | 7.68E-03 |
| ENSBTAG00000013152 | 1001.2632  | -1.2953 | 0.3274 | -3.9564 | 7.61E-05 | 7.19E-04 |
| ENSBTAG00000021102 | 362.1478   | -1.2959 | 0.2608 | -4.9698 | 6.70E-07 | 1.07E-05 |
| ENSBTAG00000021829 | 324.4382   | -1.2993 | 0.3704 | -3.5082 | 4.51E-04 | 3.35E-03 |
| ENSBTAG00000012926 | 782.5375   | -1.3014 | 0.3991 | -3.2610 | 1.11E-03 | 7.03E-03 |
| ENSBTAG00000008836 | 109.6296   | -1.3063 | 0.4117 | -3.1725 | 1.51E-03 | 9.05E-03 |



|                    |            |         |        |         |          |          |
|--------------------|------------|---------|--------|---------|----------|----------|
| ENSBTAG00000015019 | 301.3908   | -1.3075 | 0.4082 | -3.2029 | 1.36E-03 | 8.36E-03 |
| ENSBTAG00000005827 | 425.8612   | -1.3105 | 0.3192 | -4.1054 | 4.04E-05 | 4.15E-04 |
| ENSBTAG00000005676 | 1710.3934  | -1.3124 | 0.3278 | -4.0033 | 6.25E-05 | 6.09E-04 |
| ENSBTAG00000039138 | 1845.7366  | -1.3137 | 0.2707 | -4.8522 | 1.22E-06 | 1.86E-05 |
| ENSBTAG00000003245 | 1729.9639  | -1.3143 | 0.4010 | -3.2778 | 1.05E-03 | 6.71E-03 |
| ENSBTAG00000009477 | 693.9115   | -1.3189 | 0.3228 | -4.0863 | 4.38E-05 | 4.45E-04 |
| ENSBTAG00000015728 | 685.0403   | -1.3189 | 0.2571 | -5.1296 | 2.90E-07 | 5.11E-06 |
| ENSBTAG00000020527 | 12689.6281 | -1.3242 | 0.3426 | -3.8650 | 1.11E-04 | 1.01E-03 |
| ENSBTAG00000044079 | 365.4380   | -1.3308 | 0.3602 | -3.6943 | 2.21E-04 | 1.82E-03 |
| ENSBTAG00000014372 | 1453.6652  | -1.3311 | 0.2779 | -4.7901 | 1.67E-06 | 2.43E-05 |
| ENSBTAG00000015158 | 471.3088   | -1.3324 | 0.3397 | -3.9226 | 8.76E-05 | 8.15E-04 |
| ENSBTAG00000021019 | 341.9630   | -1.3327 | 0.3533 | -3.7717 | 1.62E-04 | 1.40E-03 |
| ENSBTAG00000008943 | 249.3138   | -1.3371 | 0.3480 | -3.8426 | 1.22E-04 | 1.09E-03 |
| ENSBTAG00000007133 | 1045.6067  | -1.3402 | 0.2760 | -4.8553 | 1.20E-06 | 1.83E-05 |
| ENSBTAG00000013530 | 557.9079   | -1.3414 | 0.3138 | -4.2753 | 1.91E-05 | 2.15E-04 |
| ENSBTAG00000007371 | 349.9716   | -1.3425 | 0.3323 | -4.0395 | 5.36E-05 | 5.30E-04 |
| ENSBTAG00000011512 | 299.7586   | -1.3436 | 0.3965 | -3.3882 | 7.03E-04 | 4.88E-03 |
| ENSBTAG00000000942 | 1453.8171  | -1.3438 | 0.4146 | -3.2411 | 1.19E-03 | 7.46E-03 |
| ENSBTAG00000015894 | 117.5884   | -1.3448 | 0.4211 | -3.1937 | 1.40E-03 | 8.55E-03 |
| ENSBTAG00000006212 | 158.4959   | -1.3466 | 0.3578 | -3.7639 | 1.67E-04 | 1.44E-03 |
| ENSBTAG00000018299 | 535.1230   | -1.3472 | 0.3524 | -3.8232 | 1.32E-04 | 1.17E-03 |
| ENSBTAG00000019071 | 648.2771   | -1.3480 | 0.2565 | -5.2560 | 1.47E-07 | 2.77E-06 |
| ENSBTAG00000005385 | 515.9548   | -1.3494 | 0.3725 | -3.6221 | 2.92E-04 | 2.30E-03 |
| ENSBTAG00000016156 | 2044.9322  | -1.3500 | 0.2378 | -5.6761 | 1.38E-08 | 3.08E-07 |
| ENSBTAG00000047809 | 504.8858   | -1.3521 | 0.3978 | -3.3985 | 6.78E-04 | 4.73E-03 |
| ENSBTAG00000006222 | 204.8329   | -1.3526 | 0.4255 | -3.1789 | 1.48E-03 | 8.89E-03 |
| ENSBTAG00000034269 | 413.4223   | -1.3544 | 0.3050 | -4.4412 | 8.95E-06 | 1.09E-04 |
| ENSBTAG00000000251 | 364.7892   | -1.3566 | 0.4275 | -3.1733 | 1.51E-03 | 9.03E-03 |
| ENSBTAG00000021205 | 1343.8574  | -1.3589 | 0.3994 | -3.4022 | 6.68E-04 | 4.67E-03 |
| ENSBTAG00000015097 | 1007.8680  | -1.3589 | 0.2652 | -5.1236 | 3.00E-07 | 5.25E-06 |
| ENSBTAG00000012885 | 2737.7686  | -1.3633 | 0.2919 | -4.6713 | 2.99E-06 | 4.10E-05 |
| ENSBTAG00000006775 | 4828.1123  | -1.3642 | 0.4265 | -3.1983 | 1.38E-03 | 8.48E-03 |
| ENSBTAG00000017945 | 139.1367   | -1.3645 | 0.3606 | -3.7842 | 1.54E-04 | 1.34E-03 |
| ENSBTAG00000008306 | 4464.1522  | -1.3647 | 0.2483 | -5.4951 | 3.90E-08 | 7.98E-07 |
| ENSBTAG00000013653 | 43957.8112 | -1.3658 | 0.4169 | -3.2762 | 1.05E-03 | 6.75E-03 |
| ENSBTAG00000001104 | 223.2037   | -1.3673 | 0.3565 | -3.8350 | 1.26E-04 | 1.12E-03 |
| ENSBTAG00000013127 | 1372.0186  | -1.3677 | 0.3971 | -3.4445 | 5.72E-04 | 4.11E-03 |
| ENSBTAG00000012030 | 225.0859   | -1.3707 | 0.2953 | -4.6419 | 3.45E-06 | 4.66E-05 |
| ENSBTAG00000017566 | 209.9704   | -1.3731 | 0.3267 | -4.2028 | 2.64E-05 | 2.86E-04 |
| ENSBTAG00000003504 | 985.9071   | -1.3760 | 0.3776 | -3.6440 | 2.68E-04 | 2.15E-03 |
| ENSBTAG00000017554 | 259.4623   | -1.3779 | 0.3494 | -3.9429 | 8.05E-05 | 7.57E-04 |
| ENSBTAG00000011969 | 25790.7860 | -1.3798 | 0.4361 | -3.1641 | 1.56E-03 | 9.26E-03 |
| ENSBTAG00000001640 | 519.3898   | -1.3846 | 0.3397 | -4.0760 | 4.58E-05 | 4.63E-04 |

|                    |            |         |        |         |          |          |
|--------------------|------------|---------|--------|---------|----------|----------|
| ENSBTAG00000002742 | 784.8761   | -1.3883 | 0.3334 | -4.1643 | 3.12E-05 | 3.33E-04 |
| ENSBTAG00000020371 | 313.8887   | -1.3897 | 0.3348 | -4.1507 | 3.31E-05 | 3.50E-04 |
| ENSBTAG00000010449 | 2875.8163  | -1.3912 | 0.4184 | -3.3250 | 8.84E-04 | 5.86E-03 |
| ENSBTAG00000012241 | 742.2754   | -1.3915 | 0.3622 | -3.8419 | 1.22E-04 | 1.09E-03 |
| ENSBTAG00000018513 | 884.5092   | -1.3954 | 0.4160 | -3.3543 | 7.96E-04 | 5.41E-03 |
| ENSBTAG00000005249 | 1247.9176  | -1.3956 | 0.2761 | -5.0539 | 4.33E-07 | 7.26E-06 |
| ENSBTAG00000006489 | 939.3451   | -1.3993 | 0.3045 | -4.5953 | 4.32E-06 | 5.69E-05 |
| ENSBTAG00000025893 | 4636.9439  | -1.4027 | 0.3155 | -4.4464 | 8.73E-06 | 1.07E-04 |
| ENSBTAG00000025931 | 550.8488   | -1.4044 | 0.3696 | -3.7992 | 1.45E-04 | 1.27E-03 |
| ENSBTAG00000017571 | 244.7361   | -1.4085 | 0.3851 | -3.6576 | 2.55E-04 | 2.05E-03 |
| ENSBTAG00000012365 | 2250.0865  | -1.4129 | 0.3532 | -4.0000 | 6.33E-05 | 6.15E-04 |
| ENSBTAG00000000231 | 1804.0746  | -1.4133 | 0.2715 | -5.2057 | 1.93E-07 | 3.55E-06 |
| ENSBTAG00000006526 | 682.4802   | -1.4169 | 0.2489 | -5.6932 | 1.25E-08 | 2.82E-07 |
| ENSBTAG00000015221 | 2422.1838  | -1.4174 | 0.2987 | -4.7448 | 2.09E-06 | 2.96E-05 |
| ENSBTAG00000010348 | 675.3308   | -1.4174 | 0.3472 | -4.0825 | 4.46E-05 | 4.52E-04 |
| ENSBTAG00000032951 | 604.6076   | -1.4177 | 0.3130 | -4.5289 | 5.93E-06 | 7.54E-05 |
| ENSBTAG00000026842 | 211.2076   | -1.4215 | 0.4167 | -3.4113 | 6.47E-04 | 4.55E-03 |
| ENSBTAG00000011885 | 4731.5625  | -1.4220 | 0.1979 | -7.1849 | 6.73E-13 | 3.12E-11 |
| ENSBTAG00000021798 | 721.9735   | -1.4222 | 0.4474 | -3.1792 | 1.48E-03 | 8.88E-03 |
| ENSBTAG00000001598 | 158.9813   | -1.4227 | 0.3608 | -3.9437 | 8.02E-05 | 7.56E-04 |
| ENSBTAG00000015805 | 2225.1580  | -1.4358 | 0.2786 | -5.1542 | 2.55E-07 | 4.56E-06 |
| ENSBTAG00000045925 | 5053.4330  | -1.4386 | 0.4421 | -3.2540 | 1.14E-03 | 7.18E-03 |
| ENSBTAG00000012800 | 202.8714   | -1.4396 | 0.3588 | -4.0118 | 6.03E-05 | 5.91E-04 |
| ENSBTAG00000011648 | 174.7433   | -1.4401 | 0.4171 | -3.4525 | 5.55E-04 | 4.01E-03 |
| ENSBTAG00000007622 | 11493.6391 | -1.4409 | 0.4421 | -3.2596 | 1.12E-03 | 7.07E-03 |
| ENSBTAG00000025809 | 758.3147   | -1.4411 | 0.4148 | -3.4742 | 5.12E-04 | 3.73E-03 |
| ENSBTAG00000008173 | 835.0316   | -1.4430 | 0.2820 | -5.1173 | 3.10E-07 | 5.41E-06 |
| ENSBTAG00000007684 | 1216.0388  | -1.4451 | 0.3402 | -4.2480 | 2.16E-05 | 2.40E-04 |
| ENSBTAG00000012729 | 154.5693   | -1.4482 | 0.4612 | -3.1397 | 1.69E-03 | 9.95E-03 |
| ENSBTAG00000015131 | 31970.3261 | -1.4503 | 0.2956 | -4.9070 | 9.25E-07 | 1.44E-05 |
| ENSBTAG00000021158 | 451.1629   | -1.4538 | 0.3632 | -4.0026 | 6.27E-05 | 6.09E-04 |
| ENSBTAG00000004471 | 1803.7318  | -1.4549 | 0.2612 | -5.5710 | 2.53E-08 | 5.33E-07 |
| ENSBTAG00000014601 | 4589.4660  | -1.4556 | 0.2773 | -5.2484 | 1.53E-07 | 2.88E-06 |
| ENSBTAG00000011819 | 865.1849   | -1.4559 | 0.2842 | -5.1236 | 3.00E-07 | 5.25E-06 |
| ENSBTAG00000015980 | 7231.0415  | -1.4588 | 0.2957 | -4.9335 | 8.08E-07 | 1.27E-05 |
| ENSBTAG00000000532 | 196.5773   | -1.4602 | 0.3728 | -3.9164 | 8.99E-05 | 8.33E-04 |
| ENSBTAG00000039968 | 197.6484   | -1.4606 | 0.3370 | -4.3337 | 1.47E-05 | 1.71E-04 |
| ENSBTAG00000008346 | 418.2696   | -1.4621 | 0.3320 | -4.4041 | 1.06E-05 | 1.28E-04 |
| ENSBTAG00000007220 | 1156.6415  | -1.4647 | 0.3235 | -4.5281 | 5.95E-06 | 7.56E-05 |
| ENSBTAG00000003607 | 967.7802   | -1.4669 | 0.3424 | -4.2846 | 1.83E-05 | 2.07E-04 |
| ENSBTAG00000021065 | 467.4725   | -1.4734 | 0.3997 | -3.6866 | 2.27E-04 | 1.87E-03 |
| ENSBTAG00000006985 | 1110.6514  | -1.4809 | 0.2717 | -5.4506 | 5.02E-08 | 1.01E-06 |
| ENSBTAG00000008275 | 4852.5281  | -1.4831 | 0.3324 | -4.4622 | 8.11E-06 | 1.00E-04 |

|                    |            |         |        |         |          |          |
|--------------------|------------|---------|--------|---------|----------|----------|
| ENSBTAG00000036101 | 129.3037   | -1.4881 | 0.4051 | -3.6736 | 2.39E-04 | 1.95E-03 |
| ENSBTAG00000017867 | 88.2650    | -1.4897 | 0.4229 | -3.5221 | 4.28E-04 | 3.19E-03 |
| ENSBTAG00000007933 | 187.9444   | -1.4900 | 0.4353 | -3.4230 | 6.19E-04 | 4.39E-03 |
| ENSBTAG00000038845 | 96.5036    | -1.4906 | 0.4615 | -3.2298 | 1.24E-03 | 7.71E-03 |
| ENSBTAG00000003199 | 112.5138   | -1.4907 | 0.4492 | -3.3190 | 9.03E-04 | 5.96E-03 |
| ENSBTAG00000011104 | 6276.1712  | -1.4914 | 0.2400 | -6.2135 | 5.18E-10 | 1.51E-08 |
| ENSBTAG00000005373 | 6480.7183  | -1.4926 | 0.3925 | -3.8024 | 1.43E-04 | 1.26E-03 |
| ENSBTAG00000040569 | 118.9623   | -1.4960 | 0.4115 | -3.6352 | 2.78E-04 | 2.20E-03 |
| ENSBTAG00000009655 | 2904.5571  | -1.4975 | 0.3135 | -4.7773 | 1.78E-06 | 2.57E-05 |
| ENSBTAG00000012243 | 2199.8561  | -1.4991 | 0.4619 | -3.2458 | 1.17E-03 | 7.36E-03 |
| ENSBTAG00000016724 | 816.9109   | -1.5017 | 0.3507 | -4.2823 | 1.85E-05 | 2.09E-04 |
| ENSBTAG00000005138 | 1357.7937  | -1.5045 | 0.2115 | -7.1139 | 1.13E-12 | 5.02E-11 |
| ENSBTAG00000018192 | 1161.0187  | -1.5052 | 0.4042 | -3.7241 | 1.96E-04 | 1.65E-03 |
| ENSBTAG00000024107 | 453.5479   | -1.5090 | 0.3779 | -3.9934 | 6.51E-05 | 6.30E-04 |
| ENSBTAG00000004425 | 108.8864   | -1.5091 | 0.4724 | -3.1946 | 1.40E-03 | 8.53E-03 |
| ENSBTAG00000031277 | 1009.7219  | -1.5096 | 0.3072 | -4.9137 | 8.94E-07 | 1.39E-05 |
| ENSBTAG00000021301 | 964.7847   | -1.5109 | 0.4216 | -3.5836 | 3.39E-04 | 2.61E-03 |
| ENSBTAG00000017067 | 2301.7699  | -1.5162 | 0.4611 | -3.2881 | 1.01E-03 | 6.50E-03 |
| ENSBTAG00000019552 | 6383.2081  | -1.5167 | 0.3535 | -4.2902 | 1.79E-05 | 2.02E-04 |
| ENSBTAG00000017502 | 882.0180   | -1.5167 | 0.2787 | -5.4422 | 5.26E-08 | 1.05E-06 |
| ENSBTAG00000011072 | 1673.3140  | -1.5196 | 0.2337 | -6.5034 | 7.85E-11 | 2.68E-09 |
| ENSBTAG00000002515 | 97.7696    | -1.5198 | 0.4646 | -3.2709 | 1.07E-03 | 6.86E-03 |
| ENSBTAG00000006054 | 100.3940   | -1.5214 | 0.4533 | -3.3566 | 7.89E-04 | 5.39E-03 |
| ENSBTAG00000004281 | 1167.0957  | -1.5214 | 0.4415 | -3.4462 | 5.68E-04 | 4.09E-03 |
| ENSBTAG00000002863 | 1226.0366  | -1.5216 | 0.2322 | -6.5535 | 5.62E-11 | 1.95E-09 |
| ENSBTAG00000012900 | 7309.7925  | -1.5231 | 0.3548 | -4.2926 | 1.77E-05 | 2.01E-04 |
| ENSBTAG00000032711 | 157.8157   | -1.5271 | 0.3542 | -4.3109 | 1.63E-05 | 1.88E-04 |
| ENSBTAG00000000037 | 262.2195   | -1.5274 | 0.3402 | -4.4897 | 7.13E-06 | 8.94E-05 |
| ENSBTAG00000012087 | 90.0868    | -1.5284 | 0.4479 | -3.4124 | 6.44E-04 | 4.53E-03 |
| ENSBTAG00000033180 | 130.1520   | -1.5287 | 0.3882 | -3.9385 | 8.20E-05 | 7.69E-04 |
| ENSBTAG00000006966 | 1129.6971  | -1.5319 | 0.4034 | -3.7977 | 1.46E-04 | 1.28E-03 |
| ENSBTAG00000004622 | 876.3293   | -1.5321 | 0.3413 | -4.4897 | 7.13E-06 | 8.94E-05 |
| ENSBTAG00000021372 | 609.9971   | -1.5336 | 0.3288 | -4.6639 | 3.10E-06 | 4.22E-05 |
| ENSBTAG00000005934 | 333.5528   | -1.5354 | 0.3931 | -3.9062 | 9.37E-05 | 8.66E-04 |
| ENSBTAG00000004011 | 149.7469   | -1.5431 | 0.4785 | -3.2249 | 1.26E-03 | 7.83E-03 |
| ENSBTAG00000037673 | 175.1287   | -1.5432 | 0.4664 | -3.3091 | 9.36E-04 | 6.14E-03 |
| ENSBTAG00000019010 | 313.0357   | -1.5459 | 0.3925 | -3.9383 | 8.21E-05 | 7.69E-04 |
| ENSBTAG00000004409 | 1855.9531  | -1.5459 | 0.3234 | -4.7802 | 1.75E-06 | 2.53E-05 |
| ENSBTAG00000033217 | 47064.8258 | -1.5525 | 0.2728 | -5.6910 | 1.26E-08 | 2.85E-07 |
| ENSBTAG00000020791 | 1214.9071  | -1.5552 | 0.4234 | -3.6729 | 2.40E-04 | 1.95E-03 |
| ENSBTAG00000019045 | 583.5110   | -1.5570 | 0.3324 | -4.6847 | 2.80E-06 | 3.87E-05 |
| ENSBTAG00000001385 | 296.8545   | -1.5588 | 0.3438 | -4.5334 | 5.80E-06 | 7.39E-05 |
| ENSBTAG00000012566 | 74.0986    | -1.5600 | 0.4673 | -3.3381 | 8.43E-04 | 5.67E-03 |

|                    |            |         |        |         |          |          |
|--------------------|------------|---------|--------|---------|----------|----------|
| ENSBTAG00000002186 | 831.6380   | -1.5605 | 0.4654 | -3.3532 | 7.99E-04 | 5.43E-03 |
| ENSBTAG00000000831 | 200.7842   | -1.5627 | 0.3515 | -4.4453 | 8.78E-06 | 1.08E-04 |
| ENSBTAG00000021803 | 748.0747   | -1.5637 | 0.4359 | -3.5872 | 3.34E-04 | 2.58E-03 |
| ENSBTAG00000020980 | 1733.2693  | -1.5638 | 0.3896 | -4.0142 | 5.97E-05 | 5.85E-04 |
| ENSBTAG00000011893 | 1402.7811  | -1.5643 | 0.3606 | -4.3375 | 1.44E-05 | 1.69E-04 |
| ENSBTAG00000003076 | 308.5136   | -1.5735 | 0.3876 | -4.0600 | 4.91E-05 | 4.91E-04 |
| ENSBTAG00000001721 | 339.3462   | -1.5740 | 0.3298 | -4.7718 | 1.83E-06 | 2.61E-05 |
| ENSBTAG00000002258 | 13381.9094 | -1.5740 | 0.3140 | -5.0131 | 5.36E-07 | 8.77E-06 |
| ENSBTAG00000007107 | 99.7166    | -1.5764 | 0.4527 | -3.4825 | 4.97E-04 | 3.63E-03 |
| ENSBTAG00000020346 | 110.7599   | -1.5772 | 0.4198 | -3.7575 | 1.72E-04 | 1.47E-03 |
| ENSBTAG00000013478 | 1232.9498  | -1.5780 | 0.3370 | -4.6823 | 2.84E-06 | 3.91E-05 |
| ENSBTAG00000020223 | 1789.7073  | -1.5784 | 0.3316 | -4.7595 | 1.94E-06 | 2.77E-05 |
| ENSBTAG00000005595 | 2174.4175  | -1.5849 | 0.2560 | -6.1901 | 6.01E-10 | 1.74E-08 |
| ENSBTAG00000000447 | 353.0065   | -1.5856 | 0.4284 | -3.7008 | 2.15E-04 | 1.78E-03 |
| ENSBTAG00000009017 | 3443.4663  | -1.5867 | 0.3326 | -4.7706 | 1.84E-06 | 2.62E-05 |
| ENSBTAG00000013485 | 115.4803   | -1.5870 | 0.3649 | -4.3489 | 1.37E-05 | 1.61E-04 |
| ENSBTAG00000021859 | 214.4948   | -1.5872 | 0.3787 | -4.1909 | 2.78E-05 | 3.00E-04 |
| ENSBTAG00000000341 | 986.1031   | -1.5888 | 0.2901 | -5.4775 | 4.31E-08 | 8.76E-07 |
| ENSBTAG00000012096 | 548.2937   | -1.5919 | 0.2698 | -5.9011 | 3.61E-09 | 8.92E-08 |
| ENSBTAG00000012955 | 78.5152    | -1.5920 | 0.4981 | -3.1964 | 1.39E-03 | 8.50E-03 |
| ENSBTAG00000018373 | 10955.3752 | -1.5958 | 0.3300 | -4.8354 | 1.33E-06 | 1.99E-05 |
| ENSBTAG00000012504 | 3393.5343  | -1.6003 | 0.3714 | -4.3089 | 1.64E-05 | 1.89E-04 |
| ENSBTAG00000005478 | 1411.9233  | -1.6089 | 0.3388 | -4.7485 | 2.05E-06 | 2.91E-05 |
| ENSBTAG00000017051 | 212.2213   | -1.6093 | 0.4337 | -3.7103 | 2.07E-04 | 1.72E-03 |
| ENSBTAG00000038085 | 151.2000   | -1.6120 | 0.4972 | -3.2422 | 1.19E-03 | 7.44E-03 |
| ENSBTAG00000018688 | 65.7438    | -1.6142 | 0.4827 | -3.3442 | 8.25E-04 | 5.56E-03 |
| ENSBTAG00000015807 | 290.9201   | -1.6163 | 0.3646 | -4.4334 | 9.28E-06 | 1.13E-04 |
| ENSBTAG00000009021 | 1321.6204  | -1.6172 | 0.2592 | -6.2393 | 4.40E-10 | 1.31E-08 |
| ENSBTAG00000021768 | 552.2400   | -1.6173 | 0.3820 | -4.2337 | 2.30E-05 | 2.52E-04 |
| ENSBTAG00000018661 | 1552.1824  | -1.6197 | 0.3415 | -4.7425 | 2.11E-06 | 2.99E-05 |
| ENSBTAG00000006754 | 143.7829   | -1.6208 | 0.3425 | -4.7326 | 2.22E-06 | 3.11E-05 |
| ENSBTAG00000018178 | 670.2074   | -1.6242 | 0.3556 | -4.5669 | 4.95E-06 | 6.42E-05 |
| ENSBTAG00000002417 | 566.3611   | -1.6302 | 0.4978 | -3.2751 | 1.06E-03 | 6.77E-03 |
| ENSBTAG00000005370 | 1479.9848  | -1.6313 | 0.4102 | -3.9768 | 6.99E-05 | 6.72E-04 |
| ENSBTAG00000010657 | 2877.1034  | -1.6338 | 0.3996 | -4.0884 | 4.34E-05 | 4.43E-04 |
| ENSBTAG00000046989 | 75.2985    | -1.6344 | 0.4626 | -3.5334 | 4.10E-04 | 3.08E-03 |
| ENSBTAG00000008109 | 5241.0582  | -1.6352 | 0.3304 | -4.9490 | 7.46E-07 | 1.18E-05 |
| ENSBTAG00000024240 | 2297.2039  | -1.6368 | 0.3074 | -5.3251 | 1.01E-07 | 1.95E-06 |
| ENSBTAG00000046156 | 214.8647   | -1.6397 | 0.4903 | -3.3443 | 8.25E-04 | 5.56E-03 |
| ENSBTAG00000016472 | 304.8036   | -1.6402 | 0.4077 | -4.0231 | 5.74E-05 | 5.66E-04 |
| ENSBTAG00000014907 | 370.2214   | -1.6402 | 0.2861 | -5.7324 | 9.90E-09 | 2.28E-07 |
| ENSBTAG00000008424 | 7553.6495  | -1.6425 | 0.2813 | -5.8380 | 5.28E-09 | 1.27E-07 |
| ENSBTAG00000017833 | 7211.4712  | -1.6506 | 0.2703 | -6.1061 | 1.02E-09 | 2.82E-08 |

|                    |           |         |        |         |          |          |
|--------------------|-----------|---------|--------|---------|----------|----------|
| ENSBTAG00000010472 | 401.9156  | -1.6514 | 0.3296 | -5.0098 | 5.45E-07 | 8.88E-06 |
| ENSBTAG00000008492 | 2497.2761 | -1.6517 | 0.2676 | -6.1711 | 6.78E-10 | 1.93E-08 |
| ENSBTAG00000030432 | 321.7360  | -1.6548 | 0.3217 | -5.1441 | 2.69E-07 | 4.78E-06 |
| ENSBTAG00000016486 | 731.3218  | -1.6555 | 0.4243 | -3.9012 | 9.57E-05 | 8.82E-04 |
| ENSBTAG00000000905 | 861.2332  | -1.6582 | 0.4066 | -4.0786 | 4.53E-05 | 4.58E-04 |
| ENSBTAG00000006610 | 53.2710   | -1.6593 | 0.5207 | -3.1867 | 1.44E-03 | 8.69E-03 |
| ENSBTAG00000016731 | 350.8907  | -1.6602 | 0.4176 | -3.9755 | 7.02E-05 | 6.74E-04 |
| ENSBTAG00000010326 | 123.1892  | -1.6625 | 0.4885 | -3.4029 | 6.67E-04 | 4.66E-03 |
| ENSBTAG00000009111 | 424.0193  | -1.6645 | 0.3778 | -4.4055 | 1.06E-05 | 1.27E-04 |
| ENSBTAG00000016277 | 1439.4225 | -1.6652 | 0.4701 | -3.5420 | 3.97E-04 | 2.99E-03 |
| ENSBTAG00000005203 | 149.5372  | -1.6658 | 0.4035 | -4.1288 | 3.65E-05 | 3.79E-04 |
| ENSBTAG00000014945 | 51.1291   | -1.6672 | 0.5267 | -3.1653 | 1.55E-03 | 9.24E-03 |
| ENSBTAG00000006209 | 3032.4739 | -1.6704 | 0.4946 | -3.3774 | 7.32E-04 | 5.06E-03 |
| ENSBTAG00000021036 | 1089.5160 | -1.6831 | 0.3995 | -4.2132 | 2.52E-05 | 2.75E-04 |
| ENSBTAG00000019382 | 1032.7279 | -1.6835 | 0.4732 | -3.5577 | 3.74E-04 | 2.84E-03 |
| ENSBTAG00000016455 | 286.3828  | -1.6862 | 0.5143 | -3.2786 | 1.04E-03 | 6.70E-03 |
| ENSBTAG00000005129 | 970.0957  | -1.6866 | 0.2570 | -6.5630 | 5.27E-11 | 1.85E-09 |
| ENSBTAG00000013109 | 4042.4593 | -1.6868 | 0.3189 | -5.2901 | 1.22E-07 | 2.32E-06 |
| ENSBTAG00000011413 | 624.7854  | -1.6879 | 0.4071 | -4.1463 | 3.38E-05 | 3.56E-04 |
| ENSBTAG00000004222 | 603.4519  | -1.6904 | 0.4246 | -3.9809 | 6.87E-05 | 6.62E-04 |
| ENSBTAG00000016484 | 1791.3604 | -1.6990 | 0.4765 | -3.5655 | 3.63E-04 | 2.77E-03 |
| ENSBTAG00000012380 | 4567.3802 | -1.7056 | 0.2861 | -5.9607 | 2.51E-09 | 6.49E-08 |
| ENSBTAG00000008682 | 509.3291  | -1.7069 | 0.4554 | -3.7479 | 1.78E-04 | 1.52E-03 |
| ENSBTAG00000046552 | 102.9456  | -1.7229 | 0.4599 | -3.7467 | 1.79E-04 | 1.53E-03 |
| ENSBTAG00000018555 | 50.3115   | -1.7321 | 0.5472 | -3.1655 | 1.55E-03 | 9.24E-03 |
| ENSBTAG00000021921 | 1969.6760 | -1.7321 | 0.2819 | -6.1437 | 8.06E-10 | 2.26E-08 |
| ENSBTAG00000015276 | 1241.3832 | -1.7322 | 0.4281 | -4.0464 | 5.20E-05 | 5.16E-04 |
| ENSBTAG00000015527 | 1433.4125 | -1.7384 | 0.4345 | -4.0006 | 6.32E-05 | 6.13E-04 |
| ENSBTAG00000008884 | 458.1494  | -1.7398 | 0.3684 | -4.7226 | 2.33E-06 | 3.25E-05 |
| ENSBTAG00000021992 | 101.4887  | -1.7403 | 0.4723 | -3.6849 | 2.29E-04 | 1.88E-03 |
| ENSBTAG00000001770 | 167.0767  | -1.7437 | 0.5077 | -3.4347 | 5.93E-04 | 4.23E-03 |
| ENSBTAG00000011400 | 994.4450  | -1.7442 | 0.3820 | -4.5663 | 4.96E-06 | 6.44E-05 |
| ENSBTAG00000008348 | 247.9311  | -1.7450 | 0.3618 | -4.8226 | 1.42E-06 | 2.10E-05 |
| ENSBTAG00000005633 | 4458.0156 | -1.7487 | 0.5353 | -3.2668 | 1.09E-03 | 6.92E-03 |
| ENSBTAG00000047461 | 190.3375  | -1.7504 | 0.4420 | -3.9604 | 7.48E-05 | 7.11E-04 |
| ENSBTAG00000019075 | 64.6588   | -1.7510 | 0.4769 | -3.6716 | 2.41E-04 | 1.96E-03 |
| ENSBTAG00000047717 | 655.4102  | -1.7531 | 0.5252 | -3.3378 | 8.44E-04 | 5.67E-03 |
| ENSBTAG00000018181 | 3099.0358 | -1.7533 | 0.3017 | -5.8112 | 6.20E-09 | 1.47E-07 |
| ENSBTAG00000014958 | 9984.8631 | -1.7612 | 0.3718 | -4.7375 | 2.16E-06 | 3.05E-05 |
| ENSBTAG00000010254 | 71.6223   | -1.7637 | 0.5362 | -3.2894 | 1.00E-03 | 6.49E-03 |
| ENSBTAG00000016629 | 481.1958  | -1.7642 | 0.4459 | -3.9565 | 7.61E-05 | 7.19E-04 |
| ENSBTAG00000019044 | 762.2852  | -1.7648 | 0.4787 | -3.6866 | 2.27E-04 | 1.87E-03 |
| ENSBTAG00000017330 | 908.5951  | -1.7661 | 0.5068 | -3.4845 | 4.93E-04 | 3.61E-03 |

|                     |           |         |        |         |          |          |
|---------------------|-----------|---------|--------|---------|----------|----------|
| ENSBTAG00000014809  | 7609.9970 | -1.7690 | 0.5618 | -3.1487 | 1.64E-03 | 9.69E-03 |
| ENSBTAG00000002910  | 114.2182  | -1.7744 | 0.4453 | -3.9852 | 6.74E-05 | 6.51E-04 |
| ENSBTAG00000000668  | 273.4894  | -1.7751 | 0.4587 | -3.8701 | 1.09E-04 | 9.90E-04 |
| ENSBTAG00000019434  | 1138.6112 | -1.7846 | 0.5381 | -3.3167 | 9.11E-04 | 6.00E-03 |
| ENSBTAG00000015426  | 1444.8664 | -1.7889 | 0.3834 | -4.6656 | 3.08E-06 | 4.19E-05 |
| ENSBTAG00000009037  | 171.3006  | -1.7913 | 0.5395 | -3.3204 | 8.99E-04 | 5.94E-03 |
| ENSBTAG00000015085  | 154.7108  | -1.7918 | 0.4895 | -3.6605 | 2.52E-04 | 2.03E-03 |
| ENSBTAG00000006832  | 575.1347  | -1.7927 | 0.5245 | -3.4175 | 6.32E-04 | 4.46E-03 |
| ENSBTAG00000007835  | 6228.1835 | -1.8009 | 0.3463 | -5.1999 | 1.99E-07 | 3.65E-06 |
| ENSBTAG00000004799  | 2816.7471 | -1.8046 | 0.3140 | -5.7462 | 9.13E-09 | 2.13E-07 |
| ENSBTAG00000011917  | 365.8020  | -1.8071 | 0.2846 | -6.3499 | 2.15E-10 | 6.87E-09 |
| ENSBTAG00000001748  | 103.8145  | -1.8122 | 0.4229 | -4.2847 | 1.83E-05 | 2.07E-04 |
| ENSBTAG000000048296 | 447.7982  | -1.8138 | 0.3327 | -5.4509 | 5.01E-08 | 1.01E-06 |
| ENSBTAG00000019887  | 182.1528  | -1.8199 | 0.4347 | -4.1871 | 2.83E-05 | 3.04E-04 |
| ENSBTAG00000015692  | 89.9662   | -1.8247 | 0.5500 | -3.3179 | 9.07E-04 | 5.98E-03 |
| ENSBTAG00000020489  | 2216.7872 | -1.8258 | 0.3464 | -5.2704 | 1.36E-07 | 2.57E-06 |
| ENSBTAG00000021156  | 1532.9778 | -1.8370 | 0.2835 | -6.4795 | 9.20E-11 | 3.09E-09 |
| ENSBTAG000000032148 | 795.1635  | -1.8374 | 0.4328 | -4.2452 | 2.18E-05 | 2.42E-04 |
| ENSBTAG00000015142  | 1096.8529 | -1.8438 | 0.2700 | -6.8297 | 8.51E-12 | 3.39E-10 |
| ENSBTAG00000003467  | 613.2450  | -1.8479 | 0.3174 | -5.8220 | 5.82E-09 | 1.39E-07 |
| ENSBTAG00000011027  | 2610.2796 | -1.8510 | 0.5427 | -3.4109 | 6.48E-04 | 4.55E-03 |
| ENSBTAG00000004772  | 78.0296   | -1.8517 | 0.5064 | -3.6568 | 2.55E-04 | 2.06E-03 |
| ENSBTAG00000004498  | 151.0205  | -1.8541 | 0.5612 | -3.3037 | 9.54E-04 | 6.23E-03 |
| ENSBTAG00000009372  | 826.7069  | -1.8542 | 0.2914 | -6.3632 | 1.98E-10 | 6.34E-09 |
| ENSBTAG00000018474  | 1249.9333 | -1.8547 | 0.4693 | -3.9522 | 7.74E-05 | 7.30E-04 |
| ENSBTAG00000010389  | 5751.7435 | -1.8621 | 0.4249 | -4.3821 | 1.18E-05 | 1.40E-04 |
| ENSBTAG00000007983  | 61.1878   | -1.8640 | 0.5843 | -3.1901 | 1.42E-03 | 8.62E-03 |
| ENSBTAG00000019194  | 142.7150  | -1.8695 | 0.4939 | -3.7849 | 1.54E-04 | 1.34E-03 |
| ENSBTAG00000018935  | 314.9975  | -1.8719 | 0.4838 | -3.8689 | 1.09E-04 | 9.93E-04 |
| ENSBTAG00000012106  | 184.3100  | -1.8760 | 0.4834 | -3.8811 | 1.04E-04 | 9.49E-04 |
| ENSBTAG00000000305  | 1062.6015 | -1.8817 | 0.3678 | -5.1169 | 3.11E-07 | 5.41E-06 |
| ENSBTAG00000002145  | 413.0446  | -1.8819 | 0.4432 | -4.2458 | 2.18E-05 | 2.42E-04 |
| ENSBTAG00000004722  | 86.4818   | -1.8839 | 0.4429 | -4.2535 | 2.10E-05 | 2.35E-04 |
| ENSBTAG00000002590  | 6973.8187 | -1.8851 | 0.4231 | -4.4553 | 8.38E-06 | 1.03E-04 |
| ENSBTAG00000009287  | 1041.9418 | -1.8856 | 0.3667 | -5.1418 | 2.72E-07 | 4.81E-06 |
| ENSBTAG000000038181 | 777.8345  | -1.8885 | 0.3138 | -6.0191 | 1.75E-09 | 4.69E-08 |
| ENSBTAG00000001652  | 1784.5754 | -1.8901 | 0.3729 | -5.0694 | 3.99E-07 | 6.77E-06 |
| ENSBTAG00000000843  | 1180.0922 | -1.8936 | 0.2832 | -6.6862 | 2.29E-11 | 8.51E-10 |
| ENSBTAG00000014564  | 218.4932  | -1.8978 | 0.4668 | -4.0654 | 4.79E-05 | 4.80E-04 |
| ENSBTAG00000005574  | 4806.9965 | -1.8982 | 0.5810 | -3.2671 | 1.09E-03 | 6.92E-03 |
| ENSBTAG00000015968  | 348.1743  | -1.8986 | 0.3837 | -4.9484 | 7.48E-07 | 1.18E-05 |
| ENSBTAG00000017922  | 428.2921  | -1.9018 | 0.3939 | -4.8280 | 1.38E-06 | 2.05E-05 |
| ENSBTAG00000015505  | 3615.2727 | -1.9077 | 0.4015 | -4.7516 | 2.02E-06 | 2.87E-05 |

|                     |            |         |        |         |          |          |
|---------------------|------------|---------|--------|---------|----------|----------|
| ENSBTAG00000004364  | 90.9334    | -1.9084 | 0.6000 | -3.1809 | 1.47E-03 | 8.85E-03 |
| ENSBTAG00000001752  | 135.2729   | -1.9129 | 0.3777 | -5.0641 | 4.10E-07 | 6.94E-06 |
| ENSBTAG00000006528  | 114.6997   | -1.9194 | 0.5893 | -3.2569 | 1.13E-03 | 7.11E-03 |
| ENSBTAG00000001694  | 1278.5770  | -1.9208 | 0.5678 | -3.3832 | 7.16E-04 | 4.96E-03 |
| ENSBTAG000000013688 | 764.5016   | -1.9225 | 0.3979 | -4.8313 | 1.36E-06 | 2.03E-05 |
| ENSBTAG00000004277  | 675.8960   | -1.9252 | 0.5170 | -3.7241 | 1.96E-04 | 1.65E-03 |
| ENSBTAG000000033679 | 207.5312   | -1.9263 | 0.3130 | -6.1551 | 7.50E-10 | 2.12E-08 |
| ENSBTAG000000012725 | 744.8440   | -1.9310 | 0.5786 | -3.3372 | 8.46E-04 | 5.68E-03 |
| ENSBTAG000000034963 | 87.8160    | -1.9334 | 0.4970 | -3.8904 | 1.00E-04 | 9.19E-04 |
| ENSBTAG000000025496 | 121.6029   | -1.9416 | 0.5516 | -3.5198 | 4.32E-04 | 3.22E-03 |
| ENSBTAG00000005596  | 2692.3964  | -1.9463 | 0.4742 | -4.1047 | 4.05E-05 | 4.16E-04 |
| ENSBTAG000000037729 | 63.0495    | -1.9521 | 0.6201 | -3.1483 | 1.64E-03 | 9.70E-03 |
| ENSBTAG000000037962 | 164.9769   | -1.9551 | 0.6120 | -3.1949 | 1.40E-03 | 8.53E-03 |
| ENSBTAG000000012629 | 533.5800   | -1.9557 | 0.4045 | -4.8349 | 1.33E-06 | 2.00E-05 |
| ENSBTAG000000018394 | 190.6029   | -1.9561 | 0.6040 | -3.2388 | 1.20E-03 | 7.51E-03 |
| ENSBTAG000000018638 | 70.7171    | -1.9587 | 0.5950 | -3.2921 | 9.95E-04 | 6.44E-03 |
| ENSBTAG000000021072 | 137.5696   | -1.9612 | 0.4103 | -4.7804 | 1.75E-06 | 2.53E-05 |
| ENSBTAG000000008433 | 501.3435   | -1.9672 | 0.2440 | -8.0636 | 7.41E-16 | 5.04E-14 |
| ENSBTAG000000017685 | 7026.1447  | -1.9764 | 0.4293 | -4.6043 | 4.14E-06 | 5.48E-05 |
| ENSBTAG000000019421 | 252.8585   | -1.9845 | 0.5040 | -3.9372 | 8.24E-05 | 7.71E-04 |
| ENSBTAG000000016757 | 4110.9970  | -1.9902 | 0.5244 | -3.7949 | 1.48E-04 | 1.29E-03 |
| ENSBTAG000000038540 | 127.8077   | -1.9967 | 0.6145 | -3.2493 | 1.16E-03 | 7.29E-03 |
| ENSBTAG000000014649 | 869.3397   | -2.0075 | 0.2942 | -6.8238 | 8.86E-12 | 3.53E-10 |
| ENSBTAG000000014103 | 331.1418   | -2.0083 | 0.5003 | -4.0142 | 5.96E-05 | 5.85E-04 |
| ENSBTAG000000000243 | 1310.0085  | -2.0084 | 0.4275 | -4.6975 | 2.63E-06 | 3.65E-05 |
| ENSBTAG000000031439 | 213.0605   | -2.0094 | 0.4853 | -4.1407 | 3.46E-05 | 3.63E-04 |
| ENSBTAG000000005565 | 520.2784   | -2.0107 | 0.6212 | -3.2370 | 1.21E-03 | 7.55E-03 |
| ENSBTAG000000024958 | 1435.0124  | -2.0173 | 0.4450 | -4.5329 | 5.82E-06 | 7.40E-05 |
| ENSBTAG000000010967 | 51.7645    | -2.0189 | 0.4976 | -4.0572 | 4.97E-05 | 4.95E-04 |
| ENSBTAG000000018410 | 60.0138    | -2.0307 | 0.5906 | -3.4386 | 5.85E-04 | 4.19E-03 |
| ENSBTAG000000034867 | 408.2368   | -2.0316 | 0.3397 | -5.9802 | 2.23E-09 | 5.80E-08 |
| ENSBTAG000000010541 | 63.2677    | -2.0316 | 0.5980 | -3.3973 | 6.81E-04 | 4.74E-03 |
| ENSBTAG000000000286 | 993.0973   | -2.0324 | 0.3332 | -6.0995 | 1.06E-09 | 2.93E-08 |
| ENSBTAG000000003069 | 262.1452   | -2.0326 | 0.6359 | -3.1966 | 1.39E-03 | 8.50E-03 |
| ENSBTAG000000030369 | 287.6425   | -2.0371 | 0.3445 | -5.9137 | 3.35E-09 | 8.37E-08 |
| ENSBTAG000000010356 | 4841.1873  | -2.0413 | 0.3141 | -6.4986 | 8.11E-11 | 2.75E-09 |
| ENSBTAG000000005340 | 197.3180   | -2.0436 | 0.4445 | -4.5977 | 4.27E-06 | 5.63E-05 |
| ENSBTAG000000046823 | 1742.9508  | -2.0444 | 0.2257 | -9.0600 | 1.30E-19 | 1.41E-17 |
| ENSBTAG000000000146 | 649.6227   | -2.0463 | 0.2941 | -6.9582 | 3.45E-12 | 1.43E-10 |
| ENSBTAG000000004653 | 15982.4627 | -2.0489 | 0.4645 | -4.4108 | 1.03E-05 | 1.25E-04 |
| ENSBTAG000000011810 | 629.4284   | -2.0533 | 0.6420 | -3.1982 | 1.38E-03 | 8.48E-03 |
| ENSBTAG000000013048 | 794.5911   | -2.0565 | 0.2587 | -7.9507 | 1.85E-15 | 1.23E-13 |
| ENSBTAG000000013929 | 1220.6838  | -2.0567 | 0.4300 | -4.7836 | 1.72E-06 | 2.50E-05 |

|                     |            |         |        |         |          |          |
|---------------------|------------|---------|--------|---------|----------|----------|
| ENSBTAG00000016544  | 74.1325    | -2.0569 | 0.5546 | -3.7090 | 2.08E-04 | 1.73E-03 |
| ENSBTAG00000015335  | 226.5362   | -2.0579 | 0.4275 | -4.8134 | 1.48E-06 | 2.19E-05 |
| ENSBTAG00000019373  | 2138.0613  | -2.0598 | 0.2504 | -8.2275 | 1.91E-16 | 1.40E-14 |
| ENSBTAG00000010976  | 726.6403   | -2.0617 | 0.3695 | -5.5797 | 2.41E-08 | 5.10E-07 |
| ENSBTAG00000005356  | 4105.5297  | -2.0628 | 0.4803 | -4.2943 | 1.75E-05 | 2.00E-04 |
| ENSBTAG00000001473  | 69.4825    | -2.0629 | 0.6509 | -3.1696 | 1.53E-03 | 9.13E-03 |
| ENSBTAG00000010644  | 4815.3081  | -2.0654 | 0.5788 | -3.5683 | 3.59E-04 | 2.75E-03 |
| ENSBTAG00000012342  | 1113.6969  | -2.0673 | 0.5101 | -4.0524 | 5.07E-05 | 5.04E-04 |
| ENSBTAG00000008895  | 240.6606   | -2.0700 | 0.4264 | -4.8542 | 1.21E-06 | 1.84E-05 |
| ENSBTAG00000004617  | 349.5694   | -2.0715 | 0.4822 | -4.2960 | 1.74E-05 | 1.98E-04 |
| ENSBTAG00000020844  | 964.9914   | -2.0794 | 0.4183 | -4.9712 | 6.65E-07 | 1.06E-05 |
| ENSBTAG00000001754  | 832.9408   | -2.0795 | 0.3211 | -6.4758 | 9.43E-11 | 3.15E-09 |
| ENSBTAG000000044112 | 432.1433   | -2.0860 | 0.4231 | -4.9301 | 8.22E-07 | 1.29E-05 |
| ENSBTAG00000020060  | 11901.7900 | -2.0935 | 0.4162 | -5.0304 | 4.89E-07 | 8.06E-06 |
| ENSBTAG00000021636  | 266.7854   | -2.0966 | 0.6433 | -3.2591 | 1.12E-03 | 7.07E-03 |
| ENSBTAG00000019024  | 559.2832   | -2.1033 | 0.2553 | -8.2394 | 1.73E-16 | 1.29E-14 |
| ENSBTAG00000015513  | 2334.0561  | -2.1081 | 0.4617 | -4.5660 | 4.97E-06 | 6.44E-05 |
| ENSBTAG00000011338  | 600.3545   | -2.1177 | 0.3415 | -6.2014 | 5.60E-10 | 1.62E-08 |
| ENSBTAG000000033174 | 83.6420    | -2.1178 | 0.6724 | -3.1495 | 1.64E-03 | 9.68E-03 |
| ENSBTAG00000013224  | 160.8469   | -2.1188 | 0.4310 | -4.9162 | 8.83E-07 | 1.38E-05 |
| ENSBTAG00000009998  | 335.1078   | -2.1219 | 0.6413 | -3.3084 | 9.38E-04 | 6.15E-03 |
| ENSBTAG00000015794  | 1827.4680  | -2.1241 | 0.6680 | -3.1799 | 1.47E-03 | 8.87E-03 |
| ENSBTAG00000002817  | 201.1909   | -2.1256 | 0.5964 | -3.5639 | 3.65E-04 | 2.79E-03 |
| ENSBTAG000000039789 | 53.0837    | -2.1296 | 0.6445 | -3.3044 | 9.52E-04 | 6.22E-03 |
| ENSBTAG00000012907  | 3200.0388  | -2.1336 | 0.3584 | -5.9526 | 2.64E-09 | 6.77E-08 |
| ENSBTAG00000000120  | 290.0377   | -2.1404 | 0.4231 | -5.0584 | 4.23E-07 | 7.13E-06 |
| ENSBTAG00000021934  | 575.4382   | -2.1691 | 0.2556 | -8.4865 | 2.13E-17 | 1.78E-15 |
| ENSBTAG00000007281  | 337.1625   | -2.1773 | 0.5493 | -3.9636 | 7.38E-05 | 7.03E-04 |
| ENSBTAG00000006894  | 3926.8669  | -2.1926 | 0.6900 | -3.1779 | 1.48E-03 | 8.91E-03 |
| ENSBTAG00000020934  | 100.3294   | -2.1952 | 0.6869 | -3.1956 | 1.40E-03 | 8.52E-03 |
| ENSBTAG00000007796  | 63.8095    | -2.2001 | 0.5087 | -4.3250 | 1.52E-05 | 1.77E-04 |
| ENSBTAG00000016197  | 988.7269   | -2.2055 | 0.2825 | -7.8063 | 5.89E-15 | 3.59E-13 |
| ENSBTAG00000003957  | 47.5777    | -2.2058 | 0.6966 | -3.1666 | 1.54E-03 | 9.21E-03 |
| ENSBTAG00000010745  | 407.2490   | -2.2196 | 0.4814 | -4.6105 | 4.02E-06 | 5.34E-05 |
| ENSBTAG00000021252  | 277.2062   | -2.2327 | 0.2995 | -7.4548 | 9.00E-14 | 4.68E-12 |
| ENSBTAG00000012510  | 1042.2395  | -2.2335 | 0.3214 | -6.9502 | 3.65E-12 | 1.50E-10 |
| ENSBTAG00000015534  | 399.5722   | -2.2415 | 0.3955 | -5.6670 | 1.45E-08 | 3.22E-07 |
| ENSBTAG00000006349  | 72.4605    | -2.2474 | 0.5492 | -4.0923 | 4.27E-05 | 4.36E-04 |
| ENSBTAG00000017373  | 1083.6921  | -2.2487 | 0.2996 | -7.5069 | 6.05E-14 | 3.23E-12 |
| ENSBTAG00000001417  | 242.9812   | -2.2491 | 0.6729 | -3.3422 | 8.31E-04 | 5.60E-03 |
| ENSBTAG00000021811  | 1427.9031  | -2.2522 | 0.4529 | -4.9730 | 6.59E-07 | 1.05E-05 |
| ENSBTAG00000019550  | 118.3708   | -2.2538 | 0.3961 | -5.6901 | 1.27E-08 | 2.85E-07 |
| ENSBTAG00000023374  | 899.6741   | -2.2673 | 0.5351 | -4.2372 | 2.26E-05 | 2.49E-04 |



|                    |            |         |        |         |          |          |
|--------------------|------------|---------|--------|---------|----------|----------|
| ENSBTAG00000031352 | 30.2441    | -2.2680 | 0.7022 | -3.2297 | 1.24E-03 | 7.71E-03 |
| ENSBTAG00000014506 | 299.1410   | -2.2681 | 0.4546 | -4.9897 | 6.05E-07 | 9.80E-06 |
| ENSBTAG00000000188 | 95.6480    | -2.2688 | 0.7016 | -3.2339 | 1.22E-03 | 7.62E-03 |
| ENSBTAG00000022751 | 36.3743    | -2.2746 | 0.6881 | -3.3054 | 9.48E-04 | 6.20E-03 |
| ENSBTAG00000047357 | 74.7523    | -2.2805 | 0.6813 | -3.3471 | 8.17E-04 | 5.52E-03 |
| ENSBTAG00000016194 | 124.5236   | -2.2805 | 0.5944 | -3.8365 | 1.25E-04 | 1.11E-03 |
| ENSBTAG00000021991 | 255.6433   | -2.2901 | 0.5199 | -4.4050 | 1.06E-05 | 1.28E-04 |
| ENSBTAG00000004954 | 1615.9688  | -2.2934 | 0.3423 | -6.6998 | 2.09E-11 | 7.82E-10 |
| ENSBTAG00000019621 | 3836.6449  | -2.2935 | 0.2333 | -9.8305 | 8.32E-23 | 1.46E-20 |
| ENSBTAG00000012262 | 692.3407   | -2.3008 | 0.6340 | -3.6289 | 2.85E-04 | 2.25E-03 |
| ENSBTAG00000018206 | 228.5276   | -2.3020 | 0.5946 | -3.8712 | 1.08E-04 | 9.87E-04 |
| ENSBTAG00000007121 | 1738.9332  | -2.3029 | 0.5487 | -4.1971 | 2.70E-05 | 2.92E-04 |
| ENSBTAG00000007031 | 295.2074   | -2.3076 | 0.4679 | -4.9319 | 8.14E-07 | 1.28E-05 |
| ENSBTAG00000009545 | 93.8533    | -2.3253 | 0.6896 | -3.3718 | 7.47E-04 | 5.14E-03 |
| ENSBTAG00000016549 | 778.5831   | -2.3405 | 0.3944 | -5.9339 | 2.96E-09 | 7.53E-08 |
| ENSBTAG00000010278 | 92.2219    | -2.3522 | 0.6909 | -3.4046 | 6.63E-04 | 4.64E-03 |
| ENSBTAG00000032331 | 389.7828   | -2.3526 | 0.4807 | -4.8945 | 9.86E-07 | 1.53E-05 |
| ENSBTAG00000020415 | 74.1018    | -2.3600 | 0.5147 | -4.5854 | 4.53E-06 | 5.94E-05 |
| ENSBTAG00000008576 | 72.4830    | -2.3628 | 0.5121 | -4.6137 | 3.96E-06 | 5.27E-05 |
| ENSBTAG00000008464 | 58.8833    | -2.3630 | 0.6255 | -3.7776 | 1.58E-04 | 1.37E-03 |
| ENSBTAG00000031737 | 78.0526    | -2.3674 | 0.4975 | -4.7582 | 1.95E-06 | 2.78E-05 |
| ENSBTAG00000016045 | 32442.1320 | -2.3902 | 0.4096 | -5.8358 | 5.35E-09 | 1.28E-07 |
| ENSBTAG00000019630 | 290.4017   | -2.3914 | 0.5828 | -4.1036 | 4.07E-05 | 4.17E-04 |
| ENSBTAG00000013856 | 113.2168   | -2.3932 | 0.7298 | -3.2791 | 1.04E-03 | 6.69E-03 |
| ENSBTAG00000034626 | 23.1579    | -2.4083 | 0.7598 | -3.1695 | 1.53E-03 | 9.13E-03 |
| ENSBTAG00000043985 | 512.7240   | -2.4106 | 0.4008 | -6.0149 | 1.80E-09 | 4.80E-08 |
| ENSBTAG00000014124 | 253.8794   | -2.4130 | 0.4734 | -5.0968 | 3.45E-07 | 5.93E-06 |
| ENSBTAG00000032642 | 415.3050   | -2.4479 | 0.7714 | -3.1733 | 1.51E-03 | 9.03E-03 |
| ENSBTAG00000038865 | 1107.5211  | -2.4481 | 0.4811 | -5.0888 | 3.60E-07 | 6.16E-06 |
| ENSBTAG00000020040 | 416.8064   | -2.4494 | 0.4445 | -5.5108 | 3.57E-08 | 7.33E-07 |
| ENSBTAG00000008467 | 71.2521    | -2.4567 | 0.6797 | -3.6142 | 3.01E-04 | 2.36E-03 |
| ENSBTAG00000012319 | 688.1951   | -2.4621 | 0.6783 | -3.6299 | 2.84E-04 | 2.24E-03 |
| ENSBTAG00000011076 | 106.7901   | -2.4641 | 0.7800 | -3.1592 | 1.58E-03 | 9.40E-03 |
| ENSBTAG00000009830 | 810.9596   | -2.4760 | 0.6018 | -4.1147 | 3.88E-05 | 4.00E-04 |
| ENSBTAG00000003474 | 1845.9323  | -2.4825 | 0.4837 | -5.1325 | 2.86E-07 | 5.05E-06 |
| ENSBTAG00000004732 | 55.1517    | -2.4906 | 0.7194 | -3.4619 | 5.36E-04 | 3.89E-03 |
| ENSBTAG00000019658 | 223.8922   | -2.4953 | 0.7291 | -3.4224 | 6.21E-04 | 4.40E-03 |
| ENSBTAG00000003634 | 317.8566   | -2.5037 | 0.3085 | -8.1156 | 4.83E-16 | 3.39E-14 |
| ENSBTAG00000040298 | 389.9707   | -2.5094 | 0.4141 | -6.0602 | 1.36E-09 | 3.69E-08 |
| ENSBTAG00000009065 | 3157.0752  | -2.5095 | 0.3702 | -6.7780 | 1.22E-11 | 4.76E-10 |
| ENSBTAG00000006227 | 5623.3444  | -2.5107 | 0.4832 | -5.1960 | 2.04E-07 | 3.70E-06 |
| ENSBTAG00000000153 | 682.8749   | -2.5174 | 0.6159 | -4.0873 | 4.36E-05 | 4.44E-04 |
| ENSBTAG00000004542 | 6283.3443  | -2.5193 | 0.6767 | -3.7227 | 1.97E-04 | 1.65E-03 |

|                    |            |         |        |         |          |          |
|--------------------|------------|---------|--------|---------|----------|----------|
| ENSBTAG00000014249 | 17708.1531 | -2.5385 | 0.6212 | -4.0867 | 4.38E-05 | 4.45E-04 |
| ENSBTAG00000004078 | 323.3808   | -2.5433 | 0.6590 | -3.8593 | 1.14E-04 | 1.03E-03 |
| ENSBTAG00000018530 | 51.9997    | -2.5488 | 0.5967 | -4.2716 | 1.94E-05 | 2.18E-04 |
| ENSBTAG00000021025 | 1144.6834  | -2.5561 | 0.4374 | -5.8444 | 5.08E-09 | 1.23E-07 |
| ENSBTAG00000017823 | 29.0839    | -2.5620 | 0.7637 | -3.3546 | 7.95E-04 | 5.41E-03 |
| ENSBTAG00000005034 | 154.3475   | -2.5739 | 0.4483 | -5.7417 | 9.37E-09 | 2.17E-07 |
| ENSBTAG00000013303 | 1279.2721  | -2.5819 | 0.3037 | -8.5004 | 1.89E-17 | 1.61E-15 |
| ENSBTAG00000019138 | 294.9387   | -2.5823 | 0.3673 | -7.0303 | 2.06E-12 | 8.88E-11 |
| ENSBTAG00000020205 | 761.6081   | -2.5871 | 0.4250 | -6.0870 | 1.15E-09 | 3.15E-08 |
| ENSBTAG00000047536 | 73.1767    | -2.5917 | 0.7706 | -3.3630 | 7.71E-04 | 5.28E-03 |
| ENSBTAG00000017564 | 1470.3434  | -2.5917 | 0.2763 | -9.3800 | 6.60E-21 | 9.17E-19 |
| ENSBTAG00000014899 | 110.8708   | -2.5996 | 0.5931 | -4.3828 | 1.17E-05 | 1.40E-04 |
| ENSBTAG00000010198 | 222.8214   | -2.6066 | 0.7057 | -3.6936 | 2.21E-04 | 1.82E-03 |
| ENSBTAG00000044061 | 32.4134    | -2.6072 | 0.7720 | -3.3772 | 7.32E-04 | 5.06E-03 |
| ENSBTAG00000012972 | 578.7218   | -2.6206 | 0.4267 | -6.1422 | 8.14E-10 | 2.28E-08 |
| ENSBTAG00000011660 | 85.1898    | -2.6355 | 0.7854 | -3.3558 | 7.91E-04 | 5.40E-03 |
| ENSBTAG00000003986 | 1464.8398  | -2.6481 | 0.3931 | -6.7359 | 1.63E-11 | 6.19E-10 |
| ENSBTAG00000008739 | 92.4617    | -2.6495 | 0.7567 | -3.5012 | 4.63E-04 | 3.41E-03 |
| ENSBTAG00000006515 | 37.3497    | -2.6694 | 0.8025 | -3.3262 | 8.80E-04 | 5.84E-03 |
| ENSBTAG00000017540 | 269.3464   | -2.6784 | 0.5798 | -4.6196 | 3.84E-06 | 5.13E-05 |
| ENSBTAG00000046408 | 124.0855   | -2.6832 | 0.6102 | -4.3975 | 1.09E-05 | 1.32E-04 |
| ENSBTAG00000020551 | 5234.7881  | -2.6833 | 0.4371 | -6.1389 | 8.31E-10 | 2.31E-08 |
| ENSBTAG00000033367 | 38.4144    | -2.7017 | 0.7752 | -3.4852 | 4.92E-04 | 3.60E-03 |
| ENSBTAG00000014324 | 2774.6786  | -2.7084 | 0.4682 | -5.7844 | 7.28E-09 | 1.72E-07 |
| ENSBTAG00000009029 | 231.0740   | -2.7101 | 0.5588 | -4.8500 | 1.23E-06 | 1.87E-05 |
| ENSBTAG00000010360 | 470.3733   | -2.7247 | 0.5118 | -5.3235 | 1.02E-07 | 1.97E-06 |
| ENSBTAG00000047670 | 3959.3648  | -2.7265 | 0.6042 | -4.5126 | 6.40E-06 | 8.09E-05 |
| ENSBTAG00000016255 | 164.7976   | -2.7456 | 0.3921 | -7.0014 | 2.53E-12 | 1.07E-10 |
| ENSBTAG00000011525 | 212.8660   | -2.7497 | 0.4338 | -6.3393 | 2.31E-10 | 7.32E-09 |
| ENSBTAG00000011187 | 1687.9778  | -2.7516 | 0.4639 | -5.9313 | 3.01E-09 | 7.63E-08 |
| ENSBTAG00000010999 | 70.2053    | -2.7906 | 0.5729 | -4.8713 | 1.11E-06 | 1.71E-05 |
| ENSBTAG00000003754 | 353.6063   | -2.8064 | 0.4502 | -6.2330 | 4.58E-10 | 1.35E-08 |
| ENSBTAG00000003779 | 192.6689   | -2.8096 | 0.4001 | -7.0216 | 2.19E-12 | 9.41E-11 |
| ENSBTAG00000015656 | 73.9847    | -2.8356 | 0.7236 | -3.9187 | 8.90E-05 | 8.27E-04 |
| ENSBTAG00000015345 | 43.8357    | -2.8650 | 0.8173 | -3.5054 | 4.56E-04 | 3.38E-03 |
| ENSBTAG00000001609 | 19.2253    | -2.8720 | 0.8732 | -3.2890 | 1.01E-03 | 6.49E-03 |
| ENSBTAG00000015735 | 215.3120   | -2.8723 | 0.4381 | -6.5563 | 5.51E-11 | 1.92E-09 |
| ENSBTAG00000009337 | 384.5463   | -2.8752 | 0.4900 | -5.8675 | 4.42E-09 | 1.08E-07 |
| ENSBTAG00000047216 | 79.9696    | -2.8753 | 0.5947 | -4.8352 | 1.33E-06 | 1.99E-05 |
| ENSBTAG00000012307 | 775.9691   | -2.8819 | 0.5417 | -5.3206 | 1.03E-07 | 1.99E-06 |
| ENSBTAG00000010581 | 151.7561   | -2.8873 | 0.8092 | -3.5681 | 3.60E-04 | 2.75E-03 |
| ENSBTAG00000030686 | 345.8703   | -2.8994 | 0.4949 | -5.8589 | 4.66E-09 | 1.13E-07 |
| ENSBTAG00000046017 | 315.9154   | -2.9081 | 0.5368 | -5.4175 | 6.04E-08 | 1.20E-06 |

|                    |            |         |        |          |          |          |
|--------------------|------------|---------|--------|----------|----------|----------|
| ENSBTAG00000027426 | 456.6499   | -2.9306 | 0.8716 | -3.3623  | 7.73E-04 | 5.29E-03 |
| ENSBTAG00000019453 | 89.5162    | -2.9367 | 0.7337 | -4.0025  | 6.27E-05 | 6.09E-04 |
| ENSBTAG00000000245 | 103.9015   | -2.9444 | 0.8002 | -3.6798  | 2.33E-04 | 1.91E-03 |
| ENSBTAG00000002081 | 4485.5274  | -2.9537 | 0.5520 | -5.3508  | 8.76E-08 | 1.72E-06 |
| ENSBTAG00000002914 | 501.7634   | -2.9768 | 0.7174 | -4.1495  | 3.33E-05 | 3.52E-04 |
| ENSBTAG00000015108 | 1018.7504  | -2.9957 | 0.2628 | -11.3993 | 4.22E-30 | 1.11E-27 |
| ENSBTAG00000011838 | 1060.5557  | -3.0062 | 0.4823 | -6.2327  | 4.58E-10 | 1.35E-08 |
| ENSBTAG00000019164 | 656.8833   | -3.0208 | 0.5408 | -5.5862  | 2.32E-08 | 4.94E-07 |
| ENSBTAG00000007374 | 1687.4152  | -3.0308 | 0.4050 | -7.4828  | 7.28E-14 | 3.85E-12 |
| ENSBTAG00000014001 | 2709.3616  | -3.0337 | 0.3919 | -7.7414  | 9.83E-15 | 5.79E-13 |
| ENSBTAG00000009362 | 4117.7047  | -3.0345 | 0.5442 | -5.5757  | 2.47E-08 | 5.20E-07 |
| ENSBTAG00000017616 | 622.1242   | -3.0601 | 0.8723 | -3.5082  | 4.51E-04 | 3.35E-03 |
| ENSBTAG00000006161 | 153.2699   | -3.0626 | 0.5931 | -5.1640  | 2.42E-07 | 4.34E-06 |
| ENSBTAG00000013596 | 138.0049   | -3.0707 | 0.7473 | -4.1088  | 3.98E-05 | 4.09E-04 |
| ENSBTAG00000018046 | 3984.9821  | -3.0712 | 0.4454 | -6.8950  | 5.39E-12 | 2.20E-10 |
| ENSBTAG00000007125 | 57.9615    | -3.0871 | 0.7605 | -4.0590  | 4.93E-05 | 4.93E-04 |
| ENSBTAG00000025458 | 100.4196   | -3.0946 | 0.7008 | -4.4160  | 1.01E-05 | 1.22E-04 |
| ENSBTAG00000030227 | 389.6385   | -3.1056 | 0.4219 | -7.3606  | 1.83E-13 | 9.11E-12 |
| ENSBTAG00000000875 | 237.5543   | -3.1078 | 0.3718 | -8.3597  | 6.29E-17 | 5.04E-15 |
| ENSBTAG00000002084 | 98.6722    | -3.1089 | 0.7624 | -4.0779  | 4.55E-05 | 4.59E-04 |
| ENSBTAG00000000672 | 2241.5783  | -3.1151 | 0.4570 | -6.8163  | 9.34E-12 | 3.69E-10 |
| ENSBTAG00000006403 | 60.6880    | -3.1181 | 0.8742 | -3.5668  | 3.61E-04 | 2.76E-03 |
| ENSBTAG00000006385 | 105.9428   | -3.1310 | 0.9186 | -3.4084  | 6.53E-04 | 4.58E-03 |
| ENSBTAG00000018431 | 219.4044   | -3.1407 | 0.5135 | -6.1169  | 9.54E-10 | 2.64E-08 |
| ENSBTAG00000021273 | 558.0952   | -3.1478 | 0.4512 | -6.9766  | 3.03E-12 | 1.27E-10 |
| ENSBTAG00000000124 | 198.6709   | -3.1730 | 0.7735 | -4.1023  | 4.09E-05 | 4.19E-04 |
| ENSBTAG00000007615 | 23.6992    | -3.1730 | 0.9936 | -3.1935  | 1.41E-03 | 8.55E-03 |
| ENSBTAG00000010989 | 3740.0553  | -3.1774 | 0.3587 | -8.8588  | 8.09E-19 | 8.02E-17 |
| ENSBTAG00000004751 | 25.2670    | -3.1966 | 0.9546 | -3.3488  | 8.12E-04 | 5.50E-03 |
| ENSBTAG00000034776 | 2338.1911  | -3.2182 | 0.4096 | -7.8561  | 3.96E-15 | 2.53E-13 |
| ENSBTAG00000015988 | 1307.2099  | -3.2544 | 0.8766 | -3.7125  | 2.05E-04 | 1.71E-03 |
| ENSBTAG00000021420 | 342.6957   | -3.2586 | 0.4643 | -7.0189  | 2.24E-12 | 9.54E-11 |
| ENSBTAG00000022799 | 2129.2403  | -3.2807 | 0.6812 | -4.8160  | 1.46E-06 | 2.17E-05 |
| ENSBTAG00000019722 | 88.7827    | -3.3261 | 0.6020 | -5.5253  | 3.29E-08 | 6.80E-07 |
| ENSBTAG00000014259 | 204.2966   | -3.3325 | 0.3625 | -9.1918  | 3.86E-20 | 4.49E-18 |
| ENSBTAG00000020199 | 3010.9563  | -3.3799 | 0.3503 | -9.6490  | 4.97E-22 | 7.79E-20 |
| ENSBTAG00000018524 | 162.5213   | -3.3799 | 0.3613 | -9.3547  | 8.38E-21 | 1.14E-18 |
| ENSBTAG00000017031 | 147.7341   | -3.3823 | 0.7293 | -4.6376  | 3.53E-06 | 4.75E-05 |
| ENSBTAG00000014956 | 3950.9650  | -3.3964 | 0.4326 | -7.8510  | 4.13E-15 | 2.60E-13 |
| ENSBTAG00000004591 | 164.3297   | -3.4003 | 0.6657 | -5.1082  | 3.25E-07 | 5.63E-06 |
| ENSBTAG00000006769 | 18218.2151 | -3.4315 | 0.7156 | -4.7956  | 1.62E-06 | 2.37E-05 |
| ENSBTAG00000046803 | 135.7843   | -3.4582 | 0.9404 | -3.6775  | 2.36E-04 | 1.93E-03 |
| ENSBTAG00000005475 | 67.7211    | -3.4698 | 0.8525 | -4.0702  | 4.70E-05 | 4.72E-04 |

|                    |           |         |        |          |          |          |
|--------------------|-----------|---------|--------|----------|----------|----------|
| ENSBTAG00000009194 | 236.4377  | -3.4729 | 0.3649 | -9.5168  | 1.79E-21 | 2.68E-19 |
| ENSBTAG00000017452 | 443.3350  | -3.4890 | 0.3842 | -9.0806  | 1.08E-19 | 1.17E-17 |
| ENSBTAG00000005729 | 129.4857  | -3.5005 | 0.6115 | -5.7247  | 1.04E-08 | 2.38E-07 |
| ENSBTAG00000016918 | 5600.5397 | -3.5189 | 0.4494 | -7.8307  | 4.85E-15 | 3.02E-13 |
| ENSBTAG00000007827 | 26.4229   | -3.5549 | 0.8895 | -3.9966  | 6.43E-05 | 6.22E-04 |
| ENSBTAG00000015329 | 1665.4706 | -3.5799 | 0.3858 | -9.2791  | 1.71E-20 | 2.11E-18 |
| ENSBTAG00000010362 | 1226.5618 | -3.5954 | 0.4072 | -8.8288  | 1.06E-18 | 1.02E-16 |
| ENSBTAG00000037580 | 22.0438   | -3.6012 | 0.9573 | -3.7619  | 1.69E-04 | 1.45E-03 |
| ENSBTAG00000022020 | 64.5044   | -3.6094 | 1.0504 | -3.4362  | 5.90E-04 | 4.22E-03 |
| ENSBTAG00000016220 | 358.5289  | -3.7164 | 0.4882 | -7.6128  | 2.68E-14 | 1.50E-12 |
| ENSBTAG00000019473 | 67.2030   | -3.7438 | 0.8628 | -4.3389  | 1.43E-05 | 1.68E-04 |
| ENSBTAG00000013492 | 212.1435  | -3.7811 | 0.8462 | -4.4686  | 7.88E-06 | 9.78E-05 |
| ENSBTAG00000003910 | 19.2521   | -3.7822 | 0.9973 | -3.7925  | 1.49E-04 | 1.30E-03 |
| ENSBTAG00000048304 | 20.2137   | -3.8083 | 0.8987 | -4.2375  | 2.26E-05 | 2.49E-04 |
| ENSBTAG00000032548 | 57.1963   | -3.8439 | 0.7717 | -4.9808  | 6.33E-07 | 1.02E-05 |
| ENSBTAG00000021880 | 110.5334  | -3.9027 | 0.9939 | -3.9266  | 8.61E-05 | 8.03E-04 |
| ENSBTAG00000032077 | 144.8869  | -3.9096 | 0.9106 | -4.2934  | 1.76E-05 | 2.00E-04 |
| ENSBTAG00000013801 | 112.1205  | -3.9435 | 0.7095 | -5.5586  | 2.72E-08 | 5.69E-07 |
| ENSBTAG00000019866 | 7129.0681 | -3.9510 | 0.7564 | -5.2233  | 1.76E-07 | 3.25E-06 |
| ENSBTAG00000007253 | 473.2857  | -3.9800 | 0.5564 | -7.1526  | 8.51E-13 | 3.88E-11 |
| ENSBTAG00000026156 | 67.4961   | -4.0118 | 0.9828 | -4.0820  | 4.46E-05 | 4.53E-04 |
| ENSBTAG00000045678 | 50.6366   | -4.0308 | 1.1248 | -3.5835  | 3.39E-04 | 2.61E-03 |
| ENSBTAG00000000804 | 510.8196  | -4.0562 | 0.6481 | -6.2582  | 3.89E-10 | 1.17E-08 |
| ENSBTAG00000031458 | 39.7929   | -4.0569 | 1.0743 | -3.7763  | 1.59E-04 | 1.37E-03 |
| ENSBTAG00000002025 | 1542.3201 | -4.0606 | 0.3089 | -13.1470 | 1.77E-39 | 7.96E-37 |
| ENSBTAG00000013416 | 142.2015  | -4.0987 | 0.9676 | -4.2360  | 2.28E-05 | 2.50E-04 |
| ENSBTAG00000010070 | 14.5324   | -4.1023 | 1.0387 | -3.9495  | 7.83E-05 | 7.38E-04 |
| ENSBTAG00000020018 | 18.1982   | -4.1272 | 1.1113 | -3.7140  | 2.04E-04 | 1.70E-03 |
| ENSBTAG00000016741 | 597.0625  | -4.1639 | 0.4467 | -9.3215  | 1.15E-20 | 1.52E-18 |
| ENSBTAG00000016732 | 156.2327  | -4.1769 | 0.5065 | -8.2468  | 1.63E-16 | 1.22E-14 |
| ENSBTAG00000027075 | 334.9927  | -4.1951 | 0.9759 | -4.2988  | 1.72E-05 | 1.97E-04 |
| ENSBTAG00000019065 | 291.9212  | -4.2218 | 0.6438 | -6.5578  | 5.46E-11 | 1.90E-09 |
| ENSBTAG00000011246 | 123.8375  | -4.2480 | 0.5767 | -7.3658  | 1.76E-13 | 8.83E-12 |
| ENSBTAG00000017866 | 1727.2943 | -4.3079 | 0.9027 | -4.7725  | 1.82E-06 | 2.61E-05 |
| ENSBTAG00000003319 | 1723.7719 | -4.3464 | 0.4855 | -8.9526  | 3.47E-19 | 3.61E-17 |
| ENSBTAG00000032844 | 1053.9122 | -4.3661 | 0.6733 | -6.4846  | 8.90E-11 | 2.99E-09 |
| ENSBTAG00000003667 | 325.1328  | -4.4668 | 0.5349 | -8.3511  | 6.76E-17 | 5.36E-15 |
| ENSBTAG00000020793 | 12.3443   | -4.5005 | 1.1365 | -3.9601  | 7.49E-05 | 7.11E-04 |
| ENSBTAG00000017529 | 723.1021  | -4.5514 | 0.3718 | -12.2421 | 1.85E-34 | 6.40E-32 |
| ENSBTAG00000011224 | 3376.2845 | -4.5603 | 0.5294 | -8.6135  | 7.09E-18 | 6.25E-16 |
| ENSBTAG00000021189 | 673.1758  | -4.6401 | 0.8770 | -5.2909  | 1.22E-07 | 2.31E-06 |
| ENSBTAG00000001783 | 156.0889  | -4.6608 | 0.6068 | -7.6812  | 1.58E-14 | 8.99E-13 |
| ENSBTAG00000002151 | 80.6374   | -4.8078 | 1.0712 | -4.4884  | 7.18E-06 | 8.99E-05 |

|                    |           |         |        |          |          |          |
|--------------------|-----------|---------|--------|----------|----------|----------|
| ENSBTAG00000002983 | 14.4071   | -4.8131 | 1.1091 | -4.3397  | 1.43E-05 | 1.68E-04 |
| ENSBTAG00000011461 | 27.5052   | -4.8283 | 0.9149 | -5.2774  | 1.31E-07 | 2.48E-06 |
| ENSBTAG00000004624 | 110.6526  | -4.9494 | 0.9935 | -4.9820  | 6.29E-07 | 1.01E-05 |
| ENSBTAG00000011381 | 37.3889   | -4.9528 | 0.9072 | -5.4592  | 4.78E-08 | 9.67E-07 |
| ENSBTAG00000009725 | 795.0144  | -5.1560 | 0.7154 | -7.2070  | 5.72E-13 | 2.71E-11 |
| ENSBTAG00000016754 | 17.4178   | -5.1909 | 1.2014 | -4.3208  | 1.55E-05 | 1.80E-04 |
| ENSBTAG00000006231 | 725.1027  | -5.1938 | 0.3858 | -13.4623 | 2.61E-41 | 1.26E-38 |
| ENSBTAG00000043948 | 189.4062  | -5.2532 | 1.0109 | -5.1964  | 2.03E-07 | 3.70E-06 |
| ENSBTAG00000019052 | 1179.5021 | -5.3444 | 0.8451 | -6.3243  | 2.54E-10 | 8.00E-09 |
| ENSBTAG00000021101 | 165.5768  | -5.3838 | 0.8243 | -6.5311  | 6.53E-11 | 2.24E-09 |
| ENSBTAG00000007633 | 74.0183   | -5.3909 | 0.9919 | -5.4346  | 5.49E-08 | 1.10E-06 |
| ENSBTAG00000003137 | 891.1959  | -5.4487 | 0.5952 | -9.1541  | 5.48E-20 | 6.26E-18 |
| ENSBTAG00000044123 | 239.8094  | -5.5099 | 0.6820 | -8.0789  | 6.54E-16 | 4.50E-14 |
| ENSBTAG00000006355 | 238.3656  | -5.6117 | 0.5385 | -10.4202 | 2.01E-25 | 4.22E-23 |
| ENSBTAG00000013959 | 61.2694   | -6.4335 | 0.8075 | -7.9675  | 1.62E-15 | 1.09E-13 |
| ENSBTAG00000019859 | 1455.5434 | -6.4404 | 0.7487 | -8.6021  | 7.83E-18 | 6.81E-16 |
| ENSBTAG00000007816 | 34.8040   | -6.4912 | 1.1080 | -5.8582  | 4.68E-09 | 1.13E-07 |
| ENSBTAG00000035654 | 115.0566  | -7.6406 | 0.7980 | -9.5744  | 1.02E-21 | 1.55E-19 |

---

**Supplementary Table 3:** List of 285 ERK1/2-dependent DEGs

| ENSEMBL ID          | PD0325901 + GnRH vs Vehicle + GnRH |                |        |         |          |          |
|---------------------|------------------------------------|----------------|--------|---------|----------|----------|
|                     | baseMean                           | log2FoldChange | lfcSE  | stat    | pvalue   | padj     |
| ENSBTAG00000007820  | 45.6651                            | 3.2592         | 0.5605 | 5.8149  | 6.07E-09 | 1.47E-06 |
| ENSBTAG00000006902  | 198.4353                           | 2.5489         | 0.4701 | 5.4222  | 5.89E-08 | 1.12E-05 |
| ENSBTAG000000022783 | 103.1593                           | 2.4955         | 0.4260 | 5.8577  | 4.69E-09 | 1.16E-06 |
| ENSBTAG00000007316  | 52.3715                            | 2.2861         | 0.4932 | 4.6353  | 3.56E-06 | 3.82E-04 |
| ENSBTAG000000035654 | 61.2380                            | 2.2632         | 0.5705 | 3.9670  | 7.28E-05 | 4.50E-03 |
| ENSBTAG00000009725  | 281.1559                           | 2.2086         | 0.5581 | 3.9576  | 7.57E-05 | 4.62E-03 |
| ENSBTAG000000024311 | 21.3977                            | 2.1614         | 0.5579 | 3.8744  | 1.07E-04 | 6.03E-03 |
| ENSBTAG000000040386 | 1133.3815                          | 2.0565         | 0.5327 | 3.8607  | 1.13E-04 | 6.26E-03 |
| ENSBTAG000000017136 | 33.5374                            | 2.0128         | 0.5250 | 3.8338  | 1.26E-04 | 6.66E-03 |
| ENSBTAG000000038437 | 440.1741                           | 1.9070         | 0.5026 | 3.7946  | 1.48E-04 | 7.44E-03 |
| ENSBTAG00000006894  | 3769.2844                          | 1.8201         | 0.3596 | 5.0614  | 4.16E-07 | 5.73E-05 |
| ENSBTAG000000022613 | 21982.5177                         | 1.7896         | 0.3121 | 5.7344  | 9.79E-09 | 2.29E-06 |
| ENSBTAG000000012919 | 1847.8383                          | 1.7414         | 0.3985 | 4.3699  | 1.24E-05 | 1.10E-03 |
| ENSBTAG000000021963 | 1598.7590                          | 1.7048         | 0.3009 | 5.6663  | 1.46E-08 | 3.30E-06 |
| ENSBTAG000000014581 | 88.9310                            | 1.6895         | 0.4497 | 3.7569  | 1.72E-04 | 8.30E-03 |
| ENSBTAG000000012931 | 8093.6453                          | 1.6388         | 0.3323 | 4.9320  | 8.14E-07 | 1.03E-04 |
| ENSBTAG000000019633 | 398.7565                           | 1.5897         | 0.3129 | 5.0808  | 3.76E-07 | 5.22E-05 |
| ENSBTAG000000037791 | 992.3010                           | 1.5702         | 0.3750 | 4.1873  | 2.82E-05 | 2.13E-03 |
| ENSBTAG000000023372 | 241.9832                           | 1.5503         | 0.2459 | 6.3048  | 2.88E-10 | 9.64E-08 |
| ENSBTAG000000018004 | 1421.0878                          | 1.5148         | 0.4005 | 3.7822  | 1.55E-04 | 7.74E-03 |
| ENSBTAG000000010498 | 12856.0180                         | 1.4962         | 0.4019 | 3.7228  | 1.97E-04 | 9.35E-03 |
| ENSBTAG000000021492 | 296.9165                           | 1.4732         | 0.3684 | 3.9985  | 6.37E-05 | 4.00E-03 |
| ENSBTAG000000011460 | 1291.0142                          | 1.4569         | 0.3522 | 4.1363  | 3.53E-05 | 2.54E-03 |
| ENSBTAG000000018181 | 3003.3311                          | 1.4535         | 0.1886 | 7.7059  | 1.30E-14 | 8.69E-12 |
| ENSBTAG000000020647 | 419.2874                           | 1.3947         | 0.3769 | 3.7007  | 2.15E-04 | 9.93E-03 |
| ENSBTAG000000001745 | 23540.0186                         | 1.3881         | 0.2439 | 5.6920  | 1.26E-08 | 2.89E-06 |
| ENSBTAG000000004954 | 1143.3732                          | 1.3262         | 0.3018 | 4.3943  | 1.11E-05 | 1.00E-03 |
| ENSBTAG000000034222 | 1637.6656                          | 1.2843         | 0.2879 | 4.4606  | 8.17E-06 | 7.74E-04 |
| ENSBTAG000000039696 | 1820.2368                          | 1.2769         | 0.3176 | 4.0208  | 5.80E-05 | 3.68E-03 |
| ENSBTAG000000016627 | 305.4061                           | 1.2739         | 0.3033 | 4.1999  | 2.67E-05 | 2.06E-03 |
| ENSBTAG000000013889 | 298.6815                           | 1.0870         | 0.2670 | 4.0710  | 4.68E-05 | 3.13E-03 |
| ENSBTAG000000015107 | 7375.9786                          | 1.0474         | 0.1895 | 5.5270  | 3.26E-08 | 6.73E-06 |
| ENSBTAG000000043985 | 285.4036                           | 1.0394         | 0.2525 | 4.1170  | 3.84E-05 | 2.69E-03 |
| ENSBTAG000000017763 | 2518.4658                          | -1.0321        | 0.2561 | -4.0302 | 5.57E-05 | 3.59E-03 |
| ENSBTAG000000001941 | 317.5292                           | -1.0637        | 0.2630 | -4.0444 | 5.25E-05 | 3.43E-03 |
| ENSBTAG000000009055 | 1058.5668                          | -1.0897        | 0.2699 | -4.0375 | 5.40E-05 | 3.50E-03 |
| ENSBTAG000000000266 | 3123.6644                          | -1.1006        | 0.2185 | -5.0363 | 4.75E-07 | 6.35E-05 |
| ENSBTAG000000004211 | 2116.3581                          | -1.1007        | 0.2713 | -4.0573 | 4.96E-05 | 3.29E-03 |
| ENSBTAG000000004377 | 1277.8672                          | -1.1076        | 0.2757 | -4.0171 | 5.89E-05 | 3.73E-03 |

|                    |           |         |        |         |          |          |
|--------------------|-----------|---------|--------|---------|----------|----------|
| ENSBTAG00000007596 | 8891.6855 | -1.1724 | 0.2840 | -4.1279 | 3.66E-05 | 2.59E-03 |
| ENSBTAG00000004322 | 3890.2670 | -1.1885 | 0.2740 | -4.3381 | 1.44E-05 | 1.25E-03 |
| ENSBTAG00000021523 | 7618.2061 | -1.1888 | 0.3093 | -3.8436 | 1.21E-04 | 6.60E-03 |
| ENSBTAG00000010493 | 711.6268  | -1.1912 | 0.2940 | -4.0511 | 5.10E-05 | 3.34E-03 |
| ENSBTAG00000013750 | 1006.8376 | -1.2062 | 0.3244 | -3.7187 | 2.00E-04 | 9.43E-03 |
| ENSBTAG00000038428 | 788.2573  | -1.2147 | 0.3085 | -3.9381 | 8.21E-05 | 4.89E-03 |
| ENSBTAG00000003012 | 866.9810  | -1.2273 | 0.2667 | -4.6024 | 4.18E-06 | 4.34E-04 |
| ENSBTAG00000012818 | 191.7306  | -1.2524 | 0.3315 | -3.7781 | 1.58E-04 | 7.79E-03 |
| ENSBTAG00000018082 | 275.8647  | -1.2970 | 0.3383 | -3.8342 | 1.26E-04 | 6.66E-03 |
| ENSBTAG00000021717 | 339.4716  | -1.3455 | 0.2182 | -6.1670 | 6.96E-10 | 2.12E-07 |
| ENSBTAG00000032369 | 1740.5139 | -1.3636 | 0.2660 | -5.1264 | 2.95E-07 | 4.23E-05 |
| ENSBTAG00000005816 | 646.3575  | -1.3686 | 0.3697 | -3.7022 | 2.14E-04 | 9.90E-03 |
| ENSBTAG00000009933 | 349.2805  | -1.3827 | 0.3587 | -3.8546 | 1.16E-04 | 6.38E-03 |
| ENSBTAG00000008353 | 1715.0199 | -1.3982 | 0.2590 | -5.3981 | 6.74E-08 | 1.23E-05 |
| ENSBTAG00000021818 | 1496.0128 | -1.4054 | 0.3196 | -4.3971 | 1.10E-05 | 9.94E-04 |
| ENSBTAG00000013745 | 652.5756  | -1.4265 | 0.3236 | -4.4079 | 1.04E-05 | 9.58E-04 |
| ENSBTAG00000015212 | 888.2039  | -1.4380 | 0.2697 | -5.3320 | 9.72E-08 | 1.70E-05 |
| ENSBTAG00000017745 | 2572.0794 | -1.4590 | 0.3302 | -4.4189 | 9.92E-06 | 9.16E-04 |
| ENSBTAG00000007705 | 135.4888  | -1.4649 | 0.3600 | -4.0688 | 4.72E-05 | 3.14E-03 |
| ENSBTAG00000000816 | 1539.3509 | -1.4710 | 0.3935 | -3.7380 | 1.86E-04 | 8.89E-03 |
| ENSBTAG00000031231 | 1703.1230 | -1.4974 | 0.4019 | -3.7256 | 1.95E-04 | 9.27E-03 |
| ENSBTAG00000024648 | 2184.1692 | -1.5109 | 0.3252 | -4.6461 | 3.38E-06 | 3.68E-04 |
| ENSBTAG00000001576 | 85.1045   | -1.5252 | 0.4013 | -3.8011 | 1.44E-04 | 7.34E-03 |
| ENSBTAG00000003336 | 139.2104  | -1.5253 | 0.3439 | -4.4347 | 9.22E-06 | 8.57E-04 |
| ENSBTAG00000007052 | 157.3967  | -1.5454 | 0.2992 | -5.1648 | 2.41E-07 | 3.56E-05 |
| ENSBTAG00000016217 | 1124.6114 | -1.5456 | 0.3691 | -4.1879 | 2.82E-05 | 2.13E-03 |
| ENSBTAG00000008091 | 72.2864   | -1.5797 | 0.3720 | -4.2459 | 2.18E-05 | 1.73E-03 |
| ENSBTAG00000024503 | 834.6145  | -1.5929 | 0.4234 | -3.7623 | 1.68E-04 | 8.18E-03 |
| ENSBTAG00000017457 | 381.4281  | -1.6065 | 0.3680 | -4.3655 | 1.27E-05 | 1.11E-03 |
| ENSBTAG00000007530 | 78.0713   | -1.6398 | 0.4193 | -3.9109 | 9.20E-05 | 5.39E-03 |
| ENSBTAG00000008401 | 1050.9935 | -1.6421 | 0.3285 | -4.9984 | 5.78E-07 | 7.58E-05 |
| ENSBTAG00000016061 | 319.5733  | -1.6452 | 0.4298 | -3.8282 | 1.29E-04 | 6.74E-03 |
| ENSBTAG00000010152 | 79.4367   | -1.6679 | 0.4314 | -3.8663 | 1.11E-04 | 6.21E-03 |
| ENSBTAG00000002624 | 495.6110  | -1.6815 | 0.4094 | -4.1071 | 4.01E-05 | 2.78E-03 |
| ENSBTAG00000016354 | 1117.1802 | -1.6836 | 0.3256 | -5.1706 | 2.33E-07 | 3.52E-05 |
| ENSBTAG00000006130 | 334.3320  | -1.6901 | 0.3272 | -5.1651 | 2.40E-07 | 3.56E-05 |
| ENSBTAG00000004617 | 91.4422   | -1.7030 | 0.4294 | -3.9659 | 7.31E-05 | 4.50E-03 |
| ENSBTAG00000000113 | 568.1471  | -1.7081 | 0.3896 | -4.3838 | 1.17E-05 | 1.04E-03 |
| ENSBTAG00000016656 | 610.4891  | -1.7117 | 0.3590 | -4.7678 | 1.86E-06 | 2.22E-04 |
| ENSBTAG00000015710 | 269.7640  | -1.7149 | 0.4472 | -3.8345 | 1.26E-04 | 6.66E-03 |
| ENSBTAG00000032764 | 222.0430  | -1.7253 | 0.4510 | -3.8253 | 1.31E-04 | 6.79E-03 |
| ENSBTAG00000007071 | 659.7378  | -1.7344 | 0.3659 | -4.7407 | 2.13E-06 | 2.47E-04 |
| ENSBTAG00000047591 | 224.3186  | -1.7432 | 0.4614 | -3.7779 | 1.58E-04 | 7.79E-03 |

|                    |           |         |        |         |          |          |
|--------------------|-----------|---------|--------|---------|----------|----------|
| ENSBTAG00000006324 | 857.0865  | -1.7596 | 0.4120 | -4.2707 | 1.95E-05 | 1.61E-03 |
| ENSBTAG00000008471 | 170.0698  | -1.7603 | 0.4655 | -3.7813 | 1.56E-04 | 7.74E-03 |
| ENSBTAG00000004587 | 378.1371  | -1.7638 | 0.3608 | -4.8884 | 1.02E-06 | 1.25E-04 |
| ENSBTAG00000001511 | 1359.1914 | -1.7641 | 0.3578 | -4.9309 | 8.18E-07 | 1.03E-04 |
| ENSBTAG00000000706 | 2562.4333 | -1.7792 | 0.3835 | -4.6392 | 3.50E-06 | 3.78E-04 |
| ENSBTAG00000010365 | 188.2796  | -1.8059 | 0.4641 | -3.8911 | 9.98E-05 | 5.72E-03 |
| ENSBTAG00000015127 | 1669.8960 | -1.8208 | 0.4844 | -3.7592 | 1.70E-04 | 8.25E-03 |
| ENSBTAG00000006194 | 105.5047  | -1.8318 | 0.4773 | -3.8378 | 1.24E-04 | 6.66E-03 |
| ENSBTAG00000021595 | 220.1362  | -1.8417 | 0.4788 | -3.8469 | 1.20E-04 | 6.56E-03 |
| ENSBTAG00000010785 | 213.1850  | -1.8573 | 0.2704 | -6.8690 | 6.47E-12 | 2.75E-09 |
| ENSBTAG00000021435 | 1119.2098 | -1.8584 | 0.3501 | -5.3083 | 1.11E-07 | 1.87E-05 |
| ENSBTAG00000001683 | 1158.1737 | -1.8678 | 0.4103 | -4.5517 | 5.32E-06 | 5.38E-04 |
| ENSBTAG00000020764 | 504.9261  | -1.8689 | 0.4401 | -4.2466 | 2.17E-05 | 1.73E-03 |
| ENSBTAG00000023144 | 922.1884  | -1.8727 | 0.4623 | -4.0511 | 5.10E-05 | 3.34E-03 |
| ENSBTAG00000020772 | 182.3079  | -1.8809 | 0.4968 | -3.7862 | 1.53E-04 | 7.64E-03 |
| ENSBTAG00000011421 | 178.8995  | -1.8884 | 0.4720 | -4.0010 | 6.31E-05 | 3.97E-03 |
| ENSBTAG00000045948 | 96.0723   | -1.9003 | 0.5080 | -3.7411 | 1.83E-04 | 8.81E-03 |
| ENSBTAG00000005477 | 2247.4331 | -1.9062 | 0.4787 | -3.9823 | 6.83E-05 | 4.26E-03 |
| ENSBTAG00000008631 | 946.7466  | -1.9092 | 0.5062 | -3.7719 | 1.62E-04 | 7.95E-03 |
| ENSBTAG00000008596 | 149.9558  | -1.9092 | 0.4221 | -4.5235 | 6.08E-06 | 5.93E-04 |
| ENSBTAG00000003490 | 103.7564  | -1.9178 | 0.4854 | -3.9507 | 7.79E-05 | 4.67E-03 |
| ENSBTAG00000048122 | 313.7418  | -1.9236 | 0.5061 | -3.8008 | 1.44E-04 | 7.34E-03 |
| ENSBTAG00000010447 | 357.3259  | -1.9267 | 0.4948 | -3.8941 | 9.86E-05 | 5.69E-03 |
| ENSBTAG00000002082 | 2168.9304 | -1.9324 | 0.3942 | -4.9023 | 9.47E-07 | 1.18E-04 |
| ENSBTAG00000045742 | 51.8540   | -1.9324 | 0.5199 | -3.7172 | 2.01E-04 | 9.46E-03 |
| ENSBTAG00000034529 | 68.0589   | -1.9377 | 0.4499 | -4.3072 | 1.65E-05 | 1.41E-03 |
| ENSBTAG00000006608 | 62.9427   | -1.9476 | 0.5082 | -3.8320 | 1.27E-04 | 6.66E-03 |
| ENSBTAG00000006552 | 97.4345   | -1.9519 | 0.4670 | -4.1793 | 2.92E-05 | 2.18E-03 |
| ENSBTAG00000013730 | 77.2988   | -1.9628 | 0.5296 | -3.7059 | 2.11E-04 | 9.79E-03 |
| ENSBTAG00000016551 | 149.9808  | -1.9715 | 0.4896 | -4.0272 | 5.65E-05 | 3.62E-03 |
| ENSBTAG00000024470 | 46.5805   | -1.9765 | 0.4999 | -3.9535 | 7.70E-05 | 4.64E-03 |
| ENSBTAG00000027655 | 112.3292  | -1.9801 | 0.4336 | -4.5665 | 4.96E-06 | 5.12E-04 |
| ENSBTAG00000016315 | 1484.6976 | -1.9919 | 0.4586 | -4.3432 | 1.40E-05 | 1.22E-03 |
| ENSBTAG00000031750 | 252.0250  | -1.9954 | 0.4888 | -4.0822 | 4.46E-05 | 3.04E-03 |
| ENSBTAG00000020294 | 412.0946  | -1.9988 | 0.5386 | -3.7112 | 2.06E-04 | 9.62E-03 |
| ENSBTAG00000024715 | 108.0569  | -2.0008 | 0.5210 | -3.8404 | 1.23E-04 | 6.66E-03 |
| ENSBTAG00000001198 | 93.7670   | -2.0033 | 0.5093 | -3.9332 | 8.38E-05 | 4.97E-03 |
| ENSBTAG00000004989 | 135.9989  | -2.0048 | 0.4819 | -4.1602 | 3.18E-05 | 2.33E-03 |
| ENSBTAG00000034366 | 599.7981  | -2.0078 | 0.5201 | -3.8602 | 1.13E-04 | 6.26E-03 |
| ENSBTAG00000020554 | 130.4078  | -2.0092 | 0.5293 | -3.7956 | 1.47E-04 | 7.44E-03 |
| ENSBTAG00000009554 | 241.3348  | -2.0101 | 0.5242 | -3.8342 | 1.26E-04 | 6.66E-03 |
| ENSBTAG00000020283 | 49.0945   | -2.0180 | 0.5165 | -3.9070 | 9.35E-05 | 5.44E-03 |
| ENSBTAG00000024928 | 544.8249  | -2.0197 | 0.4658 | -4.3355 | 1.45E-05 | 1.25E-03 |



|                    |            |         |        |         |          |          |
|--------------------|------------|---------|--------|---------|----------|----------|
| ENSBTAG00000015228 | 3507.7063  | -2.0255 | 0.4461 | -4.5408 | 5.60E-06 | 5.58E-04 |
| ENSBTAG00000023338 | 10783.5322 | -2.0445 | 0.2994 | -6.8293 | 8.54E-12 | 3.52E-09 |
| ENSBTAG00000010645 | 1824.9242  | -2.0448 | 0.4488 | -4.5561 | 5.21E-06 | 5.30E-04 |
| ENSBTAG00000005978 | 109.3698   | -2.0501 | 0.5254 | -3.9023 | 9.53E-05 | 5.53E-03 |
| ENSBTAG00000031701 | 98.2792    | -2.0565 | 0.5282 | -3.8932 | 9.89E-05 | 5.69E-03 |
| ENSBTAG00000009137 | 90.7610    | -2.0614 | 0.5363 | -3.8436 | 1.21E-04 | 6.60E-03 |
| ENSBTAG00000000641 | 37.3270    | -2.0690 | 0.5230 | -3.9562 | 7.61E-05 | 4.63E-03 |
| ENSBTAG00000006039 | 627.8342   | -2.0721 | 0.5341 | -3.8797 | 1.05E-04 | 5.92E-03 |
| ENSBTAG00000046158 | 849.2807   | -2.0788 | 0.4992 | -4.1645 | 3.12E-05 | 2.32E-03 |
| ENSBTAG00000047448 | 168.2597   | -2.0830 | 0.5533 | -3.7647 | 1.67E-04 | 8.13E-03 |
| ENSBTAG00000037510 | 42.9497    | -2.0853 | 0.5333 | -3.9104 | 9.21E-05 | 5.39E-03 |
| ENSBTAG00000011545 | 24.8786    | -2.0864 | 0.5607 | -3.7210 | 1.98E-04 | 9.38E-03 |
| ENSBTAG00000021672 | 87.2685    | -2.0875 | 0.5512 | -3.7869 | 1.53E-04 | 7.64E-03 |
| ENSBTAG00000009717 | 247.6319   | -2.0902 | 0.5493 | -3.8053 | 1.42E-04 | 7.28E-03 |
| ENSBTAG00000003014 | 38.6226    | -2.0927 | 0.5177 | -4.0423 | 5.29E-05 | 3.44E-03 |
| ENSBTAG00000012700 | 126.9652   | -2.1007 | 0.4642 | -4.5257 | 6.02E-06 | 5.91E-04 |
| ENSBTAG00000010888 | 346.8770   | -2.1065 | 0.5168 | -4.0761 | 4.58E-05 | 3.09E-03 |
| ENSBTAG00000005628 | 245.6256   | -2.1067 | 0.5119 | -4.1156 | 3.86E-05 | 2.70E-03 |
| ENSBTAG00000008636 | 1383.1741  | -2.1068 | 0.4143 | -5.0858 | 3.66E-07 | 5.14E-05 |
| ENSBTAG00000015562 | 87.6411    | -2.1069 | 0.5498 | -3.8324 | 1.27E-04 | 6.66E-03 |
| ENSBTAG00000000715 | 104.6538   | -2.1079 | 0.5040 | -4.1820 | 2.89E-05 | 2.17E-03 |
| ENSBTAG00000000306 | 91.3153    | -2.1134 | 0.5363 | -3.9406 | 8.13E-05 | 4.86E-03 |
| ENSBTAG00000005120 | 20.6659    | -2.1208 | 0.5711 | -3.7135 | 2.04E-04 | 9.57E-03 |
| ENSBTAG00000036154 | 13.5483    | -2.1253 | 0.5600 | -3.7951 | 1.48E-04 | 7.44E-03 |
| ENSBTAG00000018015 | 28.1663    | -2.1320 | 0.5485 | -3.8869 | 1.02E-04 | 5.80E-03 |
| ENSBTAG00000047676 | 47.4178    | -2.1329 | 0.5382 | -3.9629 | 7.40E-05 | 4.54E-03 |
| ENSBTAG00000037527 | 157.1798   | -2.1343 | 0.5019 | -4.2524 | 2.12E-05 | 1.71E-03 |
| ENSBTAG00000021647 | 33.8871    | -2.1405 | 0.5680 | -3.7681 | 1.65E-04 | 8.05E-03 |
| ENSBTAG00000006998 | 123.6625   | -2.1500 | 0.5622 | -3.8243 | 1.31E-04 | 6.79E-03 |
| ENSBTAG00000012082 | 164.7846   | -2.1502 | 0.5247 | -4.0981 | 4.17E-05 | 2.88E-03 |
| ENSBTAG00000015707 | 70.5117    | -2.1871 | 0.5284 | -4.1391 | 3.49E-05 | 2.52E-03 |
| ENSBTAG00000026963 | 84.2828    | -2.2067 | 0.4899 | -4.5042 | 6.66E-06 | 6.36E-04 |
| ENSBTAG00000016771 | 5885.8844  | -2.2153 | 0.3047 | -7.2697 | 3.60E-13 | 2.11E-10 |
| ENSBTAG00000025405 | 51.5758    | -2.2157 | 0.4878 | -4.5427 | 5.55E-06 | 5.57E-04 |
| ENSBTAG00000039160 | 145.5827   | -2.2170 | 0.5287 | -4.1937 | 2.74E-05 | 2.11E-03 |
| ENSBTAG00000007584 | 207.9883   | -2.2228 | 0.5308 | -4.1877 | 2.82E-05 | 2.13E-03 |
| ENSBTAG00000011207 | 128.1104   | -2.2235 | 0.5457 | -4.0746 | 4.61E-05 | 3.10E-03 |
| ENSBTAG00000000431 | 112.0932   | -2.2246 | 0.3787 | -5.8737 | 4.26E-09 | 1.07E-06 |
| ENSBTAG00000014090 | 280.2712   | -2.2248 | 0.4423 | -5.0295 | 4.92E-07 | 6.51E-05 |
| ENSBTAG00000027204 | 175.7894   | -2.2263 | 0.4879 | -4.5630 | 5.04E-06 | 5.17E-04 |
| ENSBTAG00000018011 | 83.8480    | -2.2300 | 0.5251 | -4.2466 | 2.17E-05 | 1.73E-03 |
| ENSBTAG00000011043 | 534.5203   | -2.2382 | 0.5230 | -4.2796 | 1.87E-05 | 1.57E-03 |
| ENSBTAG00000006707 | 560.2696   | -2.2396 | 0.5022 | -4.4594 | 8.22E-06 | 7.74E-04 |

|                    |           |         |        |         |          |          |
|--------------------|-----------|---------|--------|---------|----------|----------|
| ENSBTAG00000020872 | 200.3854  | -2.2474 | 0.5445 | -4.1273 | 3.67E-05 | 2.59E-03 |
| ENSBTAG00000001585 | 325.4032  | -2.2534 | 0.4969 | -4.5351 | 5.76E-06 | 5.69E-04 |
| ENSBTAG00000018366 | 79.8980   | -2.2535 | 0.5288 | -4.2619 | 2.03E-05 | 1.65E-03 |
| ENSBTAG00000020034 | 696.0466  | -2.2602 | 0.4660 | -4.8502 | 1.23E-06 | 1.51E-04 |
| ENSBTAG00000005390 | 184.2788  | -2.2625 | 0.5365 | -4.2172 | 2.47E-05 | 1.93E-03 |
| ENSBTAG00000018869 | 119.0481  | -2.2659 | 0.5531 | -4.0970 | 4.19E-05 | 2.88E-03 |
| ENSBTAG00000014560 | 36.6389   | -2.2691 | 0.5336 | -4.2526 | 2.11E-05 | 1.71E-03 |
| ENSBTAG00000006505 | 1446.9165 | -2.2843 | 0.5340 | -4.2781 | 1.88E-05 | 1.57E-03 |
| ENSBTAG00000009493 | 354.7421  | -2.2884 | 0.4295 | -5.3280 | 9.93E-08 | 1.72E-05 |
| ENSBTAG00000019272 | 53.9647   | -2.2961 | 0.5633 | -4.0760 | 4.58E-05 | 3.09E-03 |
| ENSBTAG00000014237 | 311.6978  | -2.2980 | 0.4840 | -4.7476 | 2.06E-06 | 2.43E-04 |
| ENSBTAG00000011578 | 939.0683  | -2.3025 | 0.4463 | -5.1587 | 2.49E-07 | 3.64E-05 |
| ENSBTAG00000003692 | 1007.7128 | -2.3174 | 0.3291 | -7.0417 | 1.90E-12 | 9.19E-10 |
| ENSBTAG00000013496 | 149.9198  | -2.3224 | 0.5479 | -4.2388 | 2.25E-05 | 1.77E-03 |
| ENSBTAG00000005892 | 129.5017  | -2.3230 | 0.5507 | -4.2184 | 2.46E-05 | 1.93E-03 |
| ENSBTAG00000013689 | 32.7745   | -2.3288 | 0.5703 | -4.0833 | 4.44E-05 | 3.04E-03 |
| ENSBTAG00000021709 | 322.1426  | -2.3387 | 0.5027 | -4.6522 | 3.28E-06 | 3.66E-04 |
| ENSBTAG00000006984 | 359.0657  | -2.3440 | 0.5275 | -4.4436 | 8.85E-06 | 8.28E-04 |
| ENSBTAG00000016770 | 43.1105   | -2.3569 | 0.5666 | -4.1600 | 3.18E-05 | 2.33E-03 |
| ENSBTAG00000020676 | 22.7972   | -2.3797 | 0.5725 | -4.1568 | 3.23E-05 | 2.35E-03 |
| ENSBTAG00000006859 | 20.3365   | -2.3814 | 0.5725 | -4.1595 | 3.19E-05 | 2.33E-03 |
| ENSBTAG00000005018 | 93.2783   | -2.3839 | 0.5412 | -4.4053 | 1.06E-05 | 9.63E-04 |
| ENSBTAG00000008497 | 45.0002   | -2.3943 | 0.5693 | -4.2059 | 2.60E-05 | 2.02E-03 |
| ENSBTAG00000014612 | 169.2886  | -2.4008 | 0.5187 | -4.6282 | 3.69E-06 | 3.92E-04 |
| ENSBTAG00000001824 | 163.9868  | -2.4046 | 0.5111 | -4.7044 | 2.55E-06 | 2.88E-04 |
| ENSBTAG00000007626 | 525.4319  | -2.4150 | 0.5029 | -4.8021 | 1.57E-06 | 1.90E-04 |
| ENSBTAG00000024272 | 78.2784   | -2.4205 | 0.5678 | -4.2628 | 2.02E-05 | 1.65E-03 |
| ENSBTAG00000022622 | 168.3787  | -2.4255 | 0.4192 | -5.7866 | 7.18E-09 | 1.71E-06 |
| ENSBTAG00000013368 | 50.9387   | -2.4268 | 0.5659 | -4.2887 | 1.80E-05 | 1.52E-03 |
| ENSBTAG00000004043 | 519.6553  | -2.4321 | 0.5282 | -4.6040 | 4.14E-06 | 4.34E-04 |
| ENSBTAG00000015978 | 1082.3857 | -2.4425 | 0.4473 | -5.4606 | 4.75E-08 | 9.13E-06 |
| ENSBTAG00000008959 | 104.5673  | -2.4446 | 0.4633 | -5.2767 | 1.32E-07 | 2.17E-05 |
| ENSBTAG00000020884 | 688.3009  | -2.4698 | 0.4701 | -5.2534 | 1.49E-07 | 2.41E-05 |
| ENSBTAG00000019293 | 28.0422   | -2.4811 | 0.5725 | -4.3335 | 1.47E-05 | 1.26E-03 |
| ENSBTAG00000005043 | 2834.4199 | -2.4844 | 0.4669 | -5.3212 | 1.03E-07 | 1.76E-05 |
| ENSBTAG00000012894 | 266.7741  | -2.4853 | 0.4935 | -5.0365 | 4.74E-07 | 6.35E-05 |
| ENSBTAG00000023283 | 99.6254   | -2.4885 | 0.5386 | -4.6201 | 3.84E-06 | 4.05E-04 |
| ENSBTAG00000008573 | 2796.9823 | -2.4936 | 0.3676 | -6.7829 | 1.18E-11 | 4.72E-09 |
| ENSBTAG00000006466 | 600.2903  | -2.4969 | 0.4677 | -5.3389 | 9.35E-08 | 1.66E-05 |
| ENSBTAG00000008142 | 318.9061  | -2.5112 | 0.4251 | -5.9077 | 3.47E-09 | 9.02E-07 |
| ENSBTAG00000039731 | 225.3526  | -2.5131 | 0.5043 | -4.9834 | 6.25E-07 | 8.12E-05 |
| ENSBTAG00000018280 | 52.5312   | -2.5137 | 0.5580 | -4.5051 | 6.63E-06 | 6.36E-04 |
| ENSBTAG00000007079 | 1221.6559 | -2.5196 | 0.4781 | -5.2702 | 1.36E-07 | 2.23E-05 |

|                      |           |         |        |         |          |          |
|----------------------|-----------|---------|--------|---------|----------|----------|
| ENSBTAG00000006780   | 65.5421   | -2.5213 | 0.5426 | -4.6468 | 3.37E-06 | 3.68E-04 |
| ENSBTAG000000034918  | 262.2156  | -2.5366 | 0.5384 | -4.7112 | 2.46E-06 | 2.81E-04 |
| ENSBTAG000000014762  | 147.4314  | -2.5410 | 0.5438 | -4.6725 | 2.98E-06 | 3.34E-04 |
| ENSBTAG000000009614  | 89.3408   | -2.5438 | 0.4975 | -5.1136 | 3.16E-07 | 4.48E-05 |
| ENSBTAG000000002615  | 169.9228  | -2.5454 | 0.4047 | -6.2897 | 3.18E-10 | 1.02E-07 |
| ENSBTAG000000016683  | 3632.6408 | -2.5624 | 0.4215 | -6.0791 | 1.21E-09 | 3.39E-07 |
| ENSBTAG000000011011  | 133.8720  | -2.5962 | 0.4748 | -5.4680 | 4.55E-08 | 8.95E-06 |
| ENSBTAG000000047379  | 90.9785   | -2.6217 | 0.5529 | -4.7420 | 2.12E-06 | 2.47E-04 |
| ENSBTAG000000016357  | 443.7551  | -2.6234 | 0.5026 | -5.2196 | 1.79E-07 | 2.83E-05 |
| ENSBTAG000000011784  | 618.6797  | -2.6290 | 0.5054 | -5.2021 | 1.97E-07 | 3.04E-05 |
| ENSBTAG000000011515  | 281.5105  | -2.6415 | 0.5058 | -5.2224 | 1.77E-07 | 2.82E-05 |
| ENSBTAG000000020674  | 199.0760  | -2.6707 | 0.4477 | -5.9660 | 2.43E-09 | 6.44E-07 |
| ENSBTAG000000048155  | 697.2993  | -2.6745 | 0.5135 | -5.2082 | 1.91E-07 | 2.97E-05 |
| ENSBTAG000000046409  | 51.9913   | -2.6821 | 0.5680 | -4.7217 | 2.34E-06 | 2.69E-04 |
| ENSBTAG000000009214  | 269.7820  | -2.6846 | 0.4769 | -5.6291 | 1.81E-08 | 4.04E-06 |
| ENSBTAG000000001009  | 331.1292  | -2.6969 | 0.4801 | -5.6171 | 1.94E-08 | 4.26E-06 |
| ENSBTAG000000018984  | 142.8545  | -2.6979 | 0.5346 | -5.0462 | 4.51E-07 | 6.14E-05 |
| ENSBTAG000000017722  | 105.4262  | -2.7220 | 0.5515 | -4.9359 | 7.98E-07 | 1.02E-04 |
| ENSBTAG000000010069  | 5008.2430 | -2.7297 | 0.5720 | -4.7726 | 1.82E-06 | 2.18E-04 |
| ENSBTAG000000005413  | 328.0298  | -2.7482 | 0.5027 | -5.4666 | 4.59E-08 | 8.95E-06 |
| ENSBTAG000000016163  | 58.0262   | -2.7483 | 0.5348 | -5.1392 | 2.76E-07 | 3.99E-05 |
| ENSBTAG000000014127  | 436.6241  | -2.7566 | 0.5202 | -5.2989 | 1.16E-07 | 1.95E-05 |
| ENSBTAG000000000095  | 114.5427  | -2.7905 | 0.5020 | -5.5592 | 2.71E-08 | 5.68E-06 |
| ENSBTAG000000012623  | 166.7796  | -2.7920 | 0.4577 | -6.1002 | 1.06E-09 | 3.03E-07 |
| ENSBTAG000000014898  | 77.2625   | -2.7980 | 0.5182 | -5.3992 | 6.70E-08 | 1.23E-05 |
| ENSBTAG000000001492  | 460.6527  | -2.8119 | 0.5047 | -5.5709 | 2.53E-08 | 5.39E-06 |
| ENSBTAG000000001154  | 534.4186  | -2.8312 | 0.4605 | -6.1480 | 7.84E-10 | 2.34E-07 |
| ENSBTAG000000007881  | 549.2791  | -2.8319 | 0.4433 | -6.3884 | 1.68E-10 | 6.04E-08 |
| ENSBTAG000000007883  | 439.7353  | -2.8784 | 0.3985 | -7.2223 | 5.11E-13 | 2.76E-10 |
| ENSBTAG0000000033565 | 210.8597  | -2.8941 | 0.4624 | -6.2585 | 3.89E-10 | 1.21E-07 |
| ENSBTAG000000013201  | 73.1055   | -2.9171 | 0.5634 | -5.1779 | 2.24E-07 | 3.42E-05 |
| ENSBTAG000000001822  | 311.2196  | -2.9674 | 0.4643 | -6.3908 | 1.65E-10 | 6.04E-08 |
| ENSBTAG0000000039046 | 260.8241  | -3.0122 | 0.5574 | -5.4042 | 6.51E-08 | 1.22E-05 |
| ENSBTAG000000014439  | 49.8320   | -3.0708 | 0.5709 | -5.3786 | 7.51E-08 | 1.35E-05 |
| ENSBTAG0000000031397 | 342.1739  | -3.0742 | 0.5584 | -5.5049 | 3.69E-08 | 7.41E-06 |
| ENSBTAG000000006343  | 80.5291   | -3.1016 | 0.5634 | -5.5050 | 3.69E-08 | 7.41E-06 |
| ENSBTAG000000014113  | 70.2286   | -3.1230 | 0.5576 | -5.6012 | 2.13E-08 | 4.60E-06 |
| ENSBTAG000000002623  | 1187.2865 | -3.1295 | 0.5109 | -6.1259 | 9.02E-10 | 2.64E-07 |
| ENSBTAG000000016593  | 430.1438  | -3.1353 | 0.4497 | -6.9717 | 3.13E-12 | 1.42E-09 |
| ENSBTAG0000000023179 | 462.5279  | -3.1451 | 0.4435 | -7.0917 | 1.32E-12 | 6.64E-10 |
| ENSBTAG000000008223  | 108.2302  | -3.1498 | 0.5205 | -6.0513 | 1.44E-09 | 3.88E-07 |
| ENSBTAG000000000436  | 506.5186  | -3.2032 | 0.4455 | -7.1896 | 6.50E-13 | 3.38E-10 |
| ENSBTAG000000008792  | 120.3418  | -3.2077 | 0.4586 | -6.9941 | 2.67E-12 | 1.25E-09 |

|                    |            |         |        |          |          |          |
|--------------------|------------|---------|--------|----------|----------|----------|
| ENSBTAG00000002215 | 2951.8734  | -3.2305 | 0.5108 | -6.3245  | 2.54E-10 | 8.70E-08 |
| ENSBTAG00000008441 | 670.2671   | -3.2374 | 0.3119 | -10.3779 | 3.13E-25 | 7.31E-22 |
| ENSBTAG00000037558 | 952.4427   | -3.2714 | 0.5387 | -6.0725  | 1.26E-09 | 3.47E-07 |
| ENSBTAG00000006566 | 72.2048    | -3.2920 | 0.5585 | -5.8942  | 3.77E-09 | 9.61E-07 |
| ENSBTAG00000006136 | 158.5240   | -3.3196 | 0.5032 | -6.5969  | 4.20E-11 | 1.59E-08 |
| ENSBTAG00000012228 | 159.9890   | -3.3217 | 0.4927 | -6.7421  | 1.56E-11 | 6.09E-09 |
| ENSBTAG00000018223 | 98.0262    | -3.3402 | 0.4828 | -6.9189  | 4.55E-12 | 2.00E-09 |
| ENSBTAG00000014368 | 144.0335   | -3.3724 | 0.5329 | -6.3283  | 2.48E-10 | 8.70E-08 |
| ENSBTAG00000016424 | 124.4214   | -3.3761 | 0.5363 | -6.2952  | 3.07E-10 | 1.00E-07 |
| ENSBTAG00000011982 | 151.4779   | -3.4422 | 0.4759 | -7.2327  | 4.74E-13 | 2.66E-10 |
| ENSBTAG00000010349 | 604.2005   | -3.5274 | 0.3899 | -9.0472  | 1.47E-19 | 1.87E-16 |
| ENSBTAG00000025250 | 481.3402   | -3.5511 | 0.4400 | -8.0702  | 7.02E-16 | 5.19E-13 |
| ENSBTAG00000035995 | 140.0171   | -3.5717 | 0.4659 | -7.6667  | 1.76E-14 | 1.13E-11 |
| ENSBTAG00000009658 | 1176.7344  | -3.8283 | 0.3917 | -9.7744  | 1.45E-22 | 2.91E-19 |
| ENSBTAG00000002340 | 131.8174   | -3.9748 | 0.5228 | -7.6029  | 2.89E-14 | 1.77E-11 |
| ENSBTAG00000038042 | 366.6777   | -4.0464 | 0.4974 | -8.1355  | 4.10E-16 | 3.20E-13 |
| ENSBTAG00000009768 | 368.8166   | -4.1086 | 0.3826 | -10.7401 | 6.60E-27 | 1.85E-23 |
| ENSBTAG00000023026 | 239.8992   | -4.1179 | 0.4758 | -8.6539  | 4.98E-18 | 4.99E-15 |
| ENSBTAG00000015865 | 418.9198   | -4.1300 | 0.5205 | -7.9342  | 2.12E-15 | 1.49E-12 |
| ENSBTAG00000013451 | 261.0602   | -4.1319 | 0.4522 | -9.1379  | 6.37E-20 | 9.93E-17 |
| ENSBTAG00000013334 | 1230.1896  | -4.1362 | 0.4811 | -8.5967  | 8.20E-18 | 7.68E-15 |
| ENSBTAG00000001273 | 286.8242   | -4.1478 | 0.4768 | -8.6988  | 3.35E-18 | 3.62E-15 |
| ENSBTAG00000019665 | 11630.9040 | -4.1733 | 0.5034 | -8.2897  | 1.14E-16 | 9.38E-14 |
| ENSBTAG00000019123 | 2240.4147  | -4.2225 | 0.5071 | -8.3263  | 8.34E-17 | 7.32E-14 |
| ENSBTAG00000000283 | 409.5562   | -4.3874 | 0.3836 | -11.4366 | 2.74E-30 | 1.28E-26 |
| ENSBTAG00000025471 | 208.8173   | -4.5476 | 0.4943 | -9.1994  | 3.60E-20 | 6.32E-17 |
| ENSBTAG00000019716 | 1971.8177  | -4.5815 | 0.5028 | -9.1122  | 8.07E-20 | 1.13E-16 |
| ENSBTAG00000015592 | 688.0430   | -4.5932 | 0.5146 | -8.9263  | 4.41E-19 | 5.15E-16 |
| ENSBTAG00000047904 | 1210.2309  | -4.8803 | 0.4489 | -10.8709 | 1.59E-27 | 5.57E-24 |
| ENSBTAG00000001321 | 6966.0164  | -5.3873 | 0.4111 | -13.1040 | 3.12E-39 | 4.39E-35 |
| ENSBTAG00000014555 | 140.1466   | -5.5119 | 0.4596 | -11.9919 | 3.92E-33 | 2.75E-29 |

**Supplementary Table 4:** List of 210 DEGs commonly regulated between two pairwise comparisons being Vehicle + GnRH vs Vehicle and PD0325901 +GnRH vs Vehicle + GnRH

| ENSEMBL ID           | Vehicle + GnRH vs Vehicle |                 |        |         |          |          | PD0325901 + GnRH vs Vehicle + GnRH |                 |        |         |          |          |
|----------------------|---------------------------|-----------------|--------|---------|----------|----------|------------------------------------|-----------------|--------|---------|----------|----------|
|                      | baseMean                  | log2Fold Change | lfcSE  | stat    | pvalue   | padj     | baseMean                           | log2Fold Change | lfcSE  | stat    | pvalue   | padj     |
| ENSBTAG00000048122   | 327.5941                  | 5.4845          | 0.7140 | 7.6809  | 1.58E-14 | 8.99E-13 | 313.7418                           | -1.9236         | 0.5061 | -3.8008 | 1.44E-04 | 7.34E-03 |
| ENSBTAG00000006505   | 1588.9178                 | 8.2961          | 0.8419 | 9.8543  | 6.57E-23 | 1.17E-20 | 1446.9165                          | -2.2843         | 0.5340 | -4.2781 | 1.88E-05 | 1.57E-03 |
| ENSBTAG00000000715   | 111.0114                  | 6.2339          | 0.8437 | 7.3891  | 1.48E-13 | 7.49E-12 | 104.6538                           | -2.1079         | 0.5040 | -4.1820 | 2.89E-05 | 2.17E-03 |
| ENSBTAG000000021709  | 355.1579                  | 4.3869          | 0.8655 | 5.0687  | 4.01E-07 | 6.78E-06 | 322.1426                           | -2.3387         | 0.5027 | -4.6522 | 3.28E-06 | 3.66E-04 |
| ENSBTAG00000006039   | 690.8921                  | 4.1795          | 0.8265 | 5.0568  | 4.26E-07 | 7.16E-06 | 627.8342                           | -2.0721         | 0.5341 | -3.8797 | 1.05E-04 | 5.92E-03 |
| ENSBTAG00000004587   | 376.6274                  | 3.8306          | 0.5913 | 6.4782  | 9.28E-11 | 3.11E-09 | 378.1371                           | -1.7638         | 0.3608 | -4.8884 | 1.02E-06 | 1.25E-04 |
| ENSBTAG00000018015   | 31.1991                   | 4.6974          | 1.0390 | 4.5211  | 6.15E-06 | 7.80E-05 | 28.1663                            | -2.1320         | 0.5485 | -3.8869 | 1.02E-04 | 5.80E-03 |
| ENSBTAG00000008441   | 807.6836                  | 2.7425          | 0.4776 | 5.7421  | 9.35E-09 | 2.17E-07 | 670.2671                           | -3.2374         | 0.3119 | 10.3779 | 3.13E-25 | 7.31E-22 |
| ENSBTAG00000006566   | 85.5741                   | 6.3878          | 1.0685 | 5.9782  | 2.26E-09 | 5.86E-08 | 72.2048                            | -3.2920         | 0.5585 | -5.8942 | 3.77E-09 | 9.61E-07 |
| ENSBTAG000000034918  | 294.4042                  | 8.0883          | 0.9822 | 8.2350  | 1.80E-16 | 1.33E-14 | 262.2156                           | -2.5366         | 0.5384 | -4.7112 | 2.46E-06 | 2.81E-04 |
| ENSBTAG000000027204  | 187.9170                  | 5.7430          | 0.8482 | 6.7706  | 1.28E-11 | 4.98E-10 | 175.7894                           | -2.2263         | 0.4879 | -4.5630 | 5.04E-06 | 5.17E-04 |
| ENSBTAG000000011578  | 1001.1047                 | 5.1227          | 0.7674 | 6.6753  | 2.47E-11 | 9.12E-10 | 939.0683                           | -2.3025         | 0.4463 | -5.1587 | 2.49E-07 | 3.64E-05 |
| ENSBTAG000000018223  | 112.6090                  | 6.7027          | 0.9003 | 7.4450  | 9.69E-14 | 5.02E-12 | 98.0262                            | -3.3402         | 0.4828 | -6.9189 | 4.55E-12 | 2.00E-09 |
| ENSBTAG000000010447  | 371.9605                  | 5.2630          | 0.6808 | 7.7309  | 1.07E-14 | 6.20E-13 | 357.3259                           | -1.9267         | 0.4948 | -3.8941 | 9.86E-05 | 5.69E-03 |
| ENSBTAG000000019272  | 61.6389                   | 5.2167          | 1.0583 | 4.9293  | 8.25E-07 | 1.29E-05 | 53.9647                            | -2.2961         | 0.5633 | -4.0760 | 4.58E-05 | 3.09E-03 |
| ENSBTAG000000037527  | 170.2118                  | 4.1358          | 0.8534 | 4.8462  | 1.26E-06 | 1.89E-05 | 157.1798                           | -2.1343         | 0.5019 | -4.2524 | 2.12E-05 | 1.71E-03 |
| ENSBTAG000000001822  | 381.0149                  | 2.6346          | 0.6275 | 4.1985  | 2.69E-05 | 2.91E-04 | 311.2196                           | -2.9674         | 0.4643 | -6.3908 | 1.65E-10 | 6.04E-08 |
| ENSBTAG000000010645  | 1929.3493                 | 3.8248          | 0.7917 | 4.8314  | 1.36E-06 | 2.03E-05 | 1824.9242                          | -2.0448         | 0.4488 | -4.5561 | 5.21E-06 | 5.30E-04 |
| ENSBTAG000000016770  | 49.7905                   | 5.2327          | 1.0376 | 5.0431  | 4.58E-07 | 7.63E-06 | 43.1105                            | -2.3569         | 0.5666 | -4.1600 | 3.18E-05 | 2.33E-03 |
| ENSBTAG000000001321  | 8261.7540                 | 12.0968         | 0.7821 | 15.4678 | 5.73E-54 | 7.72E-51 | 6966.0164                          | -5.3873         | 0.4111 | 13.1040 | 3.12E-39 | 4.39E-35 |
| ENSBTAG000000017722  | 121.9211                  | 5.9106          | 0.8493 | 6.9595  | 3.41E-12 | 1.43E-10 | 105.4262                           | -2.7220         | 0.5515 | -4.9359 | 7.98E-07 | 1.02E-04 |
| ENSBTAG000000015978  | 1214.7347                 | 3.4950          | 0.6008 | 5.8169  | 5.99E-09 | 1.43E-07 | 1082.3857                          | -2.4425         | 0.4473 | -5.4606 | 4.75E-08 | 9.13E-06 |
| ENSBTAG000000016683  | 4101.8910                 | 3.4281          | 0.6030 | 5.6854  | 1.31E-08 | 2.92E-07 | 3632.6408                          | -2.5624         | 0.4215 | -6.0791 | 1.21E-09 | 3.39E-07 |
| ENSBTAG000000006466  | 654.3450                  | 5.7105          | 0.7227 | 7.9015  | 2.76E-15 | 1.80E-13 | 600.2903                           | -2.4969         | 0.4677 | -5.3389 | 9.35E-08 | 1.66E-05 |
| ENSBTAG0000000031231 | 1742.5838                 | 2.5274          | 0.5295 | 4.7737  | 1.81E-06 | 2.60E-05 | 1703.1230                          | -1.4974         | 0.4019 | -3.7256 | 1.95E-04 | 9.27E-03 |
| ENSBTAG000000007052  | 143.5162                  | 7.7433          | 0.9536 | 8.1200  | 4.66E-16 | 3.29E-14 | 157.3967                           | -1.5454         | 0.2992 | -5.1648 | 2.41E-07 | 3.56E-05 |
| ENSBTAG000000005978  | 123.8618                  | 2.9747          | 0.8356 | 3.5601  | 3.71E-04 | 2.82E-03 | 109.3698                           | -2.0501         | 0.5254 | -3.9023 | 9.53E-05 | 5.53E-03 |
| ENSBTAG0000000048155 | 783.7776                  | 4.0557          | 1.1877 | 3.4148  | 6.38E-04 | 4.50E-03 | 697.2993                           | -2.6745         | 0.5135 | -5.2082 | 1.91E-07 | 2.97E-05 |
| ENSBTAG000000016315  | 1625.7506                 | 2.9772          | 0.6102 | 4.8787  | 1.07E-06 | 1.65E-05 | 1484.6976                          | -1.9919         | 0.4586 | -4.3432 | 1.40E-05 | 1.22E-03 |
| ENSBTAG000000000095  | 129.1531                  | 5.5902          | 0.8921 | 6.2661  | 3.70E-10 | 1.12E-08 | 114.5427                           | -2.7905         | 0.5020 | -5.5592 | 2.71E-08 | 5.68E-06 |
| ENSBTAG0000000017745 | 2731.2206                 | 1.8411          | 0.5019 | 3.6681  | 2.44E-04 | 1.98E-03 | 2572.0794                          | -1.4590         | 0.3302 | -4.4189 | 9.92E-06 | 9.16E-04 |
| ENSBTAG000000016217  | 1221.4838                 | 1.8640          | 0.4867 | 3.8297  | 1.28E-04 | 1.14E-03 | 1124.6114                          | -1.5456         | 0.3691 | -4.1879 | 2.82E-05 | 2.13E-03 |
| ENSBTAG000000008142  | 353.7349                  | 3.8428          | 0.6144 | 6.2542  | 4.00E-10 | 1.19E-08 | 318.9061                           | -2.5112         | 0.4251 | -5.9077 | 3.47E-09 | 9.02E-07 |
| ENSBTAG000000006130  | 316.0747                  | 6.2784          | 0.6496 | 9.6652  | 4.24E-22 | 6.72E-20 | 334.3320                           | -1.6901         | 0.3272 | -5.1651 | 2.40E-07 | 3.56E-05 |
| ENSBTAG000000008471  | 171.4890                  | 4.1733          | 0.9106 | 4.5831  | 4.58E-06 | 6.00E-05 | 170.0698                           | -1.7603         | 0.4655 | -3.7813 | 1.56E-04 | 7.74E-03 |
| ENSBTAG000000000266  | 2929.2015                 | 2.2579          | 0.3066 | 7.3639  | 1.79E-13 | 8.92E-12 | 3123.6644                          | -1.1006         | 0.2185 | -5.0363 | 4.75E-07 | 6.35E-05 |
| ENSBTAG000000012700  | 136.2740                  | 3.8563          | 0.6767 | 5.6984  | 1.21E-08 | 2.74E-07 | 126.9652                           | -2.1007         | 0.4642 | -4.5257 | 6.02E-06 | 5.91E-04 |
| ENSBTAG000000008401  | 1158.5253                 | 1.7883          | 0.5377 | 3.3258  | 8.82E-04 | 5.84E-03 | 1050.9935                          | -1.6421         | 0.3285 | -4.9984 | 5.78E-07 | 7.58E-05 |

|                     |           |        |        |         |          |          |           |         |        |         |          |          |
|---------------------|-----------|--------|--------|---------|----------|----------|-----------|---------|--------|---------|----------|----------|
| ENSBTAG00000023179  | 523.8677  | 5.9045 | 0.6573 | 8.9828  | 2.64E-19 | 2.82E-17 | 462.5279  | -3.1451 | 0.4435 | -7.0917 | 1.32E-12 | 6.64E-10 |
| ENSBTAG00000009614  | 100.0067  | 4.5149 | 0.8063 | 5.5997  | 2.15E-08 | 4.61E-07 | 89.3408   | -2.5438 | 0.4975 | -5.1136 | 3.16E-07 | 4.48E-05 |
| ENSBTAG00000014898  | 90.3875   | 3.7480 | 0.8319 | 4.5054  | 6.63E-06 | 8.36E-05 | 77.2625   | -2.7980 | 0.5182 | -5.3992 | 6.70E-08 | 1.23E-05 |
| ENSBTAG00000033565  | 238.4475  | 4.8702 | 0.7168 | 6.7948  | 1.08E-11 | 4.25E-10 | 210.8597  | -2.8941 | 0.4624 | -6.2585 | 3.89E-10 | 1.21E-07 |
| ENSBTAG00000025471  | 247.9527  | 7.4121 | 0.9136 | 8.1130  | 4.94E-16 | 3.45E-14 | 208.8173  | -4.5476 | 0.4943 | -9.1994 | 3.60E-20 | 6.32E-17 |
| ENSBTAG00000039046  | 305.4257  | 7.8987 | 1.0044 | 7.8639  | 3.72E-15 | 2.39E-13 | 260.8241  | -3.0122 | 0.5574 | -5.4042 | 6.51E-08 | 1.22E-05 |
| ENSBTAG00000005477  | 2360.4130 | 4.0406 | 0.6275 | 6.4392  | 1.20E-10 | 3.96E-09 | 2247.4331 | -1.9062 | 0.4787 | -3.9823 | 6.83E-05 | 4.26E-03 |
| ENSBTAG00000013334  | 1444.2931 | 9.3142 | 0.8107 | 11.4891 | 1.50E-30 | 4.12E-28 | 1230.1896 | -4.1362 | 0.4811 | -8.5967 | 8.20E-18 | 7.68E-15 |
| ENSBTAG00000015212  | 986.8776  | 1.3979 | 0.3732 | 3.7462  | 1.80E-04 | 1.53E-03 | 888.2039  | -1.4380 | 0.2697 | -5.3320 | 9.72E-08 | 1.70E-05 |
| ENSBTAG00000011043  | 587.1969  | 5.2279 | 0.6389 | 8.1826  | 2.78E-16 | 2.00E-14 | 534.5203  | -2.2382 | 0.5230 | -4.2796 | 1.87E-05 | 1.57E-03 |
| ENSBTAG00000020884  | 780.5113  | 3.3763 | 0.7402 | 4.5613  | 5.08E-06 | 6.57E-05 | 688.3009  | -2.4698 | 0.4701 | -5.2534 | 1.49E-07 | 2.41E-05 |
| ENSBTAG00000000641  | 40.0206   | 5.2653 | 0.9681 | 5.4390  | 5.36E-08 | 1.07E-06 | 37.3270   | -2.0690 | 0.5230 | -3.9562 | 7.61E-05 | 4.63E-03 |
| ENSBTAG00000013689  | 38.3357   | 4.6895 | 1.0766 | 4.3558  | 1.33E-05 | 1.57E-04 | 32.7745   | -2.3288 | 0.5703 | -4.0833 | 4.44E-05 | 3.04E-03 |
| ENSBTAG00000016771  | 5946.4817 | 7.9561 | 0.5101 | 15.5962 | 7.72E-55 | 1.30E-51 | 5885.8844 | -2.2153 | 0.3047 | -7.2697 | 3.60E-13 | 2.11E-10 |
| ENSBTAG00000002215  | 3554.3251 | 3.3218 | 0.8435 | 3.9379  | 8.22E-05 | 7.70E-04 | 2951.8734 | -3.2305 | 0.5108 | -6.3245 | 2.54E-10 | 8.70E-08 |
| ENSBTAG00000036154  | 15.3533   | 3.9670 | 1.0715 | 3.7022  | 2.14E-04 | 1.77E-03 | 13.5483   | -2.1253 | 0.5600 | -3.7951 | 1.48E-04 | 7.44E-03 |
| ENSBTAG00000013201  | 88.3757   | 4.0007 | 0.8574 | 4.6660  | 3.07E-06 | 4.19E-05 | 73.1055   | -2.9171 | 0.5634 | -5.1779 | 2.24E-07 | 3.42E-05 |
| ENSBTAG000000047676 | 52.9694   | 3.7485 | 0.9473 | 3.9571  | 7.59E-05 | 7.18E-04 | 47.4178   | -2.1329 | 0.5382 | -3.9629 | 7.40E-05 | 4.54E-03 |
| ENSBTAG00000018869  | 135.3945  | 4.4886 | 0.8393 | 5.3480  | 8.89E-08 | 1.74E-06 | 119.0481  | -2.2659 | 0.5531 | -4.0970 | 4.19E-05 | 2.88E-03 |
| ENSBTAG00000020674  | 223.5519  | 4.0561 | 0.7117 | 5.6990  | 1.21E-08 | 2.74E-07 | 199.0760  | -2.6707 | 0.4477 | -5.9660 | 2.43E-09 | 6.44E-07 |
| ENSBTAG00000008223  | 127.5209  | 3.8935 | 0.9997 | 3.8945  | 9.84E-05 | 9.06E-04 | 108.2302  | -3.1498 | 0.5205 | -6.0513 | 1.44E-09 | 3.88E-07 |
| ENSBTAG00000002623  | 1362.8380 | 7.5297 | 0.7740 | 9.7279  | 2.29E-22 | 3.72E-20 | 1187.2865 | -3.1295 | 0.5109 | -6.1259 | 9.02E-10 | 2.64E-07 |
| ENSBTAG00000022622  | 192.1988  | 2.9760 | 0.4114 | 7.2337  | 4.70E-13 | 2.25E-11 | 168.3787  | -2.4255 | 0.4192 | -5.7866 | 7.18E-09 | 1.71E-06 |
| ENSBTAG00000037510  | 46.7588   | 4.6889 | 0.9902 | 4.7351  | 2.19E-06 | 3.08E-05 | 42.9497   | -2.0853 | 0.5333 | -3.9104 | 9.21E-05 | 5.39E-03 |
| ENSBTAG00000010069  | 6423.0355 | 2.6736 | 0.8367 | 3.1953  | 1.40E-03 | 8.52E-03 | 5008.2430 | -2.7297 | 0.5720 | -4.7726 | 1.82E-06 | 2.18E-04 |
| ENSBTAG00000012894  | 291.7767  | 6.9739 | 0.8535 | 8.1706  | 3.07E-16 | 2.20E-14 | 266.7741  | -2.4853 | 0.4935 | -5.0365 | 4.74E-07 | 6.35E-05 |
| ENSBTAG00000016061  | 309.7472  | 5.0918 | 0.7749 | 6.5713  | 4.99E-11 | 1.77E-09 | 319.5733  | -1.6452 | 0.4298 | -3.8282 | 1.29E-04 | 6.74E-03 |
| ENSBTAG00000018280  | 60.1686   | 6.2571 | 1.0568 | 5.9208  | 3.20E-09 | 8.09E-08 | 52.5312   | -2.5137 | 0.5580 | -4.5051 | 6.63E-06 | 6.36E-04 |
| ENSBTAG00000012623  | 189.8271  | 4.0542 | 0.6190 | 6.5498  | 5.76E-11 | 1.99E-09 | 166.7796  | -2.7920 | 0.4577 | -6.1002 | 1.06E-09 | 3.03E-07 |
| ENSBTAG00000001273  | 337.2373  | 7.1719 | 0.8459 | 8.4785  | 2.28E-17 | 1.90E-15 | 286.8242  | -4.1478 | 0.4768 | -8.6988 | 3.35E-18 | 3.62E-15 |
| ENSBTAG00000004322  | 3346.2945 | 5.1600 | 0.5448 | 9.4716  | 2.76E-21 | 4.00E-19 | 3890.2670 | -1.1885 | 0.2740 | -4.3381 | 1.44E-05 | 1.25E-03 |
| ENSBTAG00000021818  | 1523.3348 | 2.1835 | 0.3875 | 5.6344  | 1.76E-08 | 3.86E-07 | 1496.0128 | -1.4054 | 0.3196 | -4.3971 | 1.10E-05 | 9.94E-04 |
| ENSBTAG00000020872  | 223.4640  | 5.1804 | 0.8212 | 6.3084  | 2.82E-10 | 8.82E-09 | 200.3854  | -2.2474 | 0.5445 | -4.1273 | 3.67E-05 | 2.59E-03 |
| ENSBTAG00000000436  | 579.8521  | 5.0889 | 0.6291 | 8.0889  | 6.02E-16 | 4.16E-14 | 506.5186  | -3.2032 | 0.4455 | -7.1896 | 6.50E-13 | 3.38E-10 |
| ENSBTAG00000015865  | 495.4450  | 8.3334 | 0.8907 | 9.3565  | 8.24E-21 | 1.13E-18 | 418.9198  | -4.1300 | 0.5205 | -7.9342 | 2.12E-15 | 1.49E-12 |
| ENSBTAG00000038428  | 725.4953  | 3.0527 | 0.4116 | 7.4172  | 1.20E-13 | 6.13E-12 | 788.2573  | -1.2147 | 0.3085 | -3.9381 | 8.21E-05 | 4.89E-03 |
| ENSBTAG00000010888  | 382.1166  | 3.8445 | 0.7601 | 5.0577  | 4.24E-07 | 7.14E-06 | 346.8770  | -2.1065 | 0.5168 | -4.0761 | 4.58E-05 | 3.09E-03 |
| ENSBTAG00000007079  | 1342.4463 | 5.4228 | 0.6980 | 7.7696  | 7.88E-15 | 4.68E-13 | 1221.6559 | -2.5196 | 0.4781 | -5.2702 | 1.36E-07 | 2.23E-05 |
| ENSBTAG00000006194  | 107.2551  | 4.9577 | 0.8790 | 5.6400  | 1.70E-08 | 3.75E-07 | 105.5047  | -1.8318 | 0.4773 | -3.8378 | 1.24E-04 | 6.66E-03 |
| ENSBTAG00000015562  | 96.3725   | 6.0284 | 0.8559 | 7.0432  | 1.88E-12 | 8.20E-11 | 87.6411   | -2.1069 | 0.5498 | -3.8324 | 1.27E-04 | 6.66E-03 |
| ENSBTAG00000037558  | 1112.0383 | 8.7569 | 0.9449 | 9.2675  | 1.91E-20 | 2.31E-18 | 952.4427  | -3.2714 | 0.5387 | -6.0725 | 1.26E-09 | 3.47E-07 |
| ENSBTAG00000027655  | 127.7520  | 2.3075 | 0.4631 | 4.9826  | 6.27E-07 | 1.01E-05 | 112.3292  | -1.9801 | 0.4336 | -4.5665 | 4.96E-06 | 5.12E-04 |
| ENSBTAG00000002340  | 155.9542  | 7.2697 | 1.0188 | 7.1353  | 9.66E-13 | 4.37E-11 | 131.8174  | -3.9748 | 0.5228 | -7.6029 | 2.89E-14 | 1.77E-11 |

|                     |           |         |        |         |          |          |           |         |        |         |          |          |
|---------------------|-----------|---------|--------|---------|----------|----------|-----------|---------|--------|---------|----------|----------|
| ENSBTAG00000018984  | 163.8858  | 5.0499  | 0.8383 | 6.0240  | 1.70E-09 | 4.56E-08 | 142.8545  | -2.6979 | 0.5346 | -5.0462 | 4.51E-07 | 6.14E-05 |
| ENSBTAG00000006343  | 95.3510   | 6.7426  | 1.0380 | 6.4956  | 8.27E-11 | 2.79E-09 | 80.5291   | -3.1016 | 0.5634 | -5.5050 | 3.69E-08 | 7.41E-06 |
| ENSBTAG000000047904 | 1431.0922 | 10.5501 | 0.8595 | 12.2752 | 1.23E-34 | 4.37E-32 | 1210.2309 | -4.8803 | 0.4489 | 10.8709 | 1.59E-27 | 5.57E-24 |
| ENSBTAG00000000706  | 2573.7218 | 3.8447  | 0.5065 | 7.5906  | 3.18E-14 | 1.74E-12 | 2562.4333 | -1.7792 | 0.3835 | -4.6392 | 3.50E-06 | 3.78E-04 |
| ENSBTAG00000001576  | 95.9240   | 1.5823  | 0.4901 | 3.2284  | 1.24E-03 | 7.75E-03 | 85.1045   | -1.5252 | 0.4013 | -3.8011 | 1.44E-04 | 7.34E-03 |
| ENSBTAG00000005120  | 23.7657   | 4.7800  | 1.1564 | 4.1337  | 3.57E-05 | 3.72E-04 | 20.6659   | -2.1208 | 0.5711 | -3.7135 | 2.04E-04 | 9.57E-03 |
| ENSBTAG00000025250  | 553.0634  | 6.6539  | 0.7125 | 9.3386  | 9.76E-21 | 1.32E-18 | 481.3402  | -3.5511 | 0.4400 | -8.0702 | 7.02E-16 | 5.19E-13 |
| ENSBTAG00000014612  | 190.5284  | 4.0545  | 0.8751 | 4.6330  | 3.60E-06 | 4.85E-05 | 169.2886  | -2.4008 | 0.5187 | -4.6282 | 3.69E-06 | 3.92E-04 |
| ENSBTAG00000017457  | 416.0405  | 1.9160  | 0.5195 | 3.6880  | 2.26E-04 | 1.86E-03 | 381.4281  | -1.6065 | 0.3680 | -4.3655 | 1.27E-05 | 1.11E-03 |
| ENSBTAG00000005043  | 3386.5329 | 2.4584  | 0.6333 | 3.8821  | 1.04E-04 | 9.46E-04 | 2834.4199 | -2.4844 | 0.4669 | -5.3212 | 1.03E-07 | 1.76E-05 |
| ENSBTAG000000046409 | 61.2862   | 5.7135  | 0.9803 | 5.8283  | 5.60E-09 | 1.34E-07 | 51.9913   | -2.6821 | 0.5680 | -4.7217 | 2.34E-06 | 2.69E-04 |
| ENSBTAG000000038042 | 431.1692  | 8.5962  | 0.9602 | 8.9524  | 3.48E-19 | 3.61E-17 | 366.6777  | -4.0464 | 0.4974 | -8.1355 | 4.10E-16 | 3.20E-13 |
| ENSBTAG00000015707  | 76.3656   | 6.6953  | 1.0245 | 6.5355  | 6.34E-11 | 2.18E-09 | 70.5117   | -2.1871 | 0.5284 | -4.1391 | 3.49E-05 | 2.52E-03 |
| ENSBTAG00000015228  | 3759.7133 | 3.3038  | 0.7716 | 4.2819  | 1.85E-05 | 2.09E-04 | 3507.7063 | -2.0255 | 0.4461 | -4.5408 | 5.60E-06 | 5.58E-04 |
| ENSBTAG00000001154  | 606.2876  | 4.4443  | 0.6166 | 7.2080  | 5.68E-13 | 2.70E-11 | 534.4186  | -2.8312 | 0.4605 | -6.1480 | 7.84E-10 | 2.34E-07 |
| ENSBTAG00000019293  | 34.5205   | 3.4063  | 1.0339 | 3.2947  | 9.85E-04 | 6.40E-03 | 28.0422   | -2.4811 | 0.5725 | -4.3335 | 1.47E-05 | 1.26E-03 |
| ENSBTAG00000017763  | 2247.6335 | 2.7630  | 0.3848 | 7.1796  | 6.99E-13 | 3.22E-11 | 2518.4658 | -1.0321 | 0.2561 | -4.0302 | 5.57E-05 | 3.59E-03 |
| ENSBTAG00000000283  | 481.0707  | 6.0077  | 0.5616 | 10.6982 | 1.04E-26 | 2.37E-24 | 409.5562  | -4.3874 | 0.3836 | 11.4366 | 2.74E-30 | 1.28E-26 |
| ENSBTAG000000006780 | 74.1900   | 5.6700  | 1.0256 | 5.5284  | 3.23E-08 | 6.71E-07 | 65.5421   | -2.5213 | 0.5426 | -4.6468 | 3.37E-06 | 3.68E-04 |
| ENSBTAG00000002624  | 506.4162  | 3.0441  | 0.6821 | 4.4629  | 8.09E-06 | 1.00E-04 | 495.6110  | -1.6815 | 0.4094 | -4.1071 | 4.01E-05 | 2.78E-03 |
| ENSBTAG000000006984 | 421.5356  | 3.0164  | 0.6852 | 4.4024  | 1.07E-05 | 1.29E-04 | 359.0657  | -2.3440 | 0.5275 | -4.4436 | 8.85E-06 | 8.28E-04 |
| ENSBTAG000000000431 | 115.6526  | 5.8634  | 0.6804 | 8.6180  | 6.81E-18 | 6.04E-16 | 112.0932  | -2.2246 | 0.3787 | -5.8737 | 4.26E-09 | 1.07E-06 |
| ENSBTAG000000006707 | 608.9144  | 5.0087  | 0.6952 | 7.2044  | 5.83E-13 | 2.75E-11 | 560.2696  | -2.2396 | 0.5022 | -4.4594 | 8.22E-06 | 7.74E-04 |
| ENSBTAG00000016593  | 496.6370  | 4.2463  | 0.7036 | 6.0353  | 1.59E-09 | 4.26E-08 | 430.1438  | -3.1353 | 0.4497 | -6.9717 | 3.13E-12 | 1.42E-09 |
| ENSBTAG000000006608 | 67.4652   | 3.9000  | 0.8138 | 4.7924  | 1.65E-06 | 2.40E-05 | 62.9427   | -1.9476 | 0.5082 | -3.8320 | 1.27E-04 | 6.66E-03 |
| ENSBTAG000000031397 | 404.1610  | 6.0031  | 0.8209 | 7.3130  | 2.61E-13 | 1.28E-11 | 342.1739  | -3.0742 | 0.5584 | -5.5049 | 3.69E-08 | 7.41E-06 |
| ENSBTAG000000019123 | 2648.8416 | 8.7258  | 0.7078 | 12.3279 | 6.41E-35 | 2.34E-32 | 2240.4147 | -4.2225 | 0.5071 | -8.3263 | 8.34E-17 | 7.32E-14 |
| ENSBTAG00000015710  | 266.4422  | 5.2398  | 0.6552 | 7.9975  | 1.27E-15 | 8.60E-14 | 269.7640  | -1.7149 | 0.4472 | -3.8345 | 1.26E-04 | 6.66E-03 |
| ENSBTAG00000014368  | 168.5765  | 6.7992  | 0.9656 | 7.0413  | 1.91E-12 | 8.29E-11 | 144.0335  | -3.3724 | 0.5329 | -6.3283 | 2.48E-10 | 8.70E-08 |
| ENSBTAG000000007881 | 607.7495  | 5.9727  | 0.8089 | 7.3840  | 1.54E-13 | 7.76E-12 | 549.2791  | -2.8319 | 0.4433 | -6.3884 | 1.68E-10 | 6.04E-08 |
| ENSBTAG000000007626 | 579.6998  | 5.1881  | 0.7118 | 7.2892  | 3.12E-13 | 1.51E-11 | 525.4319  | -2.4150 | 0.5029 | -4.8021 | 1.57E-06 | 1.90E-04 |
| ENSBTAG000000006859 | 24.1786   | 4.7045  | 1.1645 | 4.0400  | 5.35E-05 | 5.29E-04 | 20.3365   | -2.3814 | 0.5725 | -4.1595 | 3.19E-05 | 2.33E-03 |
| ENSBTAG000000011421 | 191.7185  | 3.2160  | 0.6634 | 4.8478  | 1.25E-06 | 1.88E-05 | 178.8995  | -1.8884 | 0.4720 | -4.0010 | 6.31E-05 | 3.97E-03 |
| ENSBTAG000000008091 | 81.9241   | 1.5478  | 0.4691 | 3.2995  | 9.69E-04 | 6.31E-03 | 72.2864   | -1.5797 | 0.3720 | -4.2459 | 2.18E-05 | 1.73E-03 |
| ENSBTAG000000031750 | 266.8580  | 4.3600  | 0.6994 | 6.2338  | 4.55E-10 | 1.35E-08 | 252.0250  | -1.9954 | 0.4888 | -4.0822 | 4.46E-05 | 3.04E-03 |
| ENSBTAG00000013451  | 305.3331  | 7.6876  | 0.7630 | 10.0754 | 7.09E-24 | 1.37E-21 | 261.0602  | -4.1319 | 0.4522 | -9.1379 | 6.37E-20 | 9.93E-17 |
| ENSBTAG000000026963 | 89.6813   | 6.1490  | 0.9549 | 6.4394  | 1.20E-10 | 3.96E-09 | 84.2828   | -2.2067 | 0.4899 | -4.5042 | 6.66E-06 | 6.36E-04 |
| ENSBTAG000000001585 | 364.9243  | 3.4498  | 0.7103 | 4.8571  | 1.19E-06 | 1.82E-05 | 325.4032  | -2.2534 | 0.4969 | -4.5351 | 5.76E-06 | 5.69E-04 |
| ENSBTAG00000012082  | 183.0709  | 3.6516  | 0.9030 | 4.0440  | 5.26E-05 | 5.21E-04 | 164.7846  | -2.1502 | 0.5247 | -4.0981 | 4.17E-05 | 2.88E-03 |
| ENSBTAG000000009717 | 273.1533  | 5.2859  | 0.8346 | 6.3333  | 2.40E-10 | 7.59E-09 | 247.6319  | -2.0902 | 0.5493 | -3.8053 | 1.42E-04 | 7.28E-03 |
| ENSBTAG000000005892 | 145.1695  | 6.3447  | 1.0164 | 6.2422  | 4.31E-10 | 1.28E-08 | 129.5017  | -2.3230 | 0.5507 | -4.2184 | 2.46E-05 | 1.93E-03 |
| ENSBTAG00000015127  | 1836.2790 | 2.6560  | 0.6347 | 4.1843  | 2.86E-05 | 3.07E-04 | 1669.8960 | -1.8208 | 0.4844 | -3.7592 | 1.70E-04 | 8.25E-03 |
| ENSBTAG000000047448 | 185.6885  | 5.8566  | 0.8406 | 6.9670  | 3.24E-12 | 1.36E-10 | 168.2597  | -2.0830 | 0.5533 | -3.7647 | 1.67E-04 | 8.13E-03 |

|                     |            |         |        |         |           |           |            |         |        |         |          |          |
|---------------------|------------|---------|--------|---------|-----------|-----------|------------|---------|--------|---------|----------|----------|
| ENSBTAG00000013730  | 81.9317    | 6.0302  | 0.9603 | 6.2794  | 3.40E-10  | 1.04E-08  | 77.2988    | -1.9628 | 0.5296 | -3.7059 | 2.11E-04 | 9.79E-03 |
| ENSBTAG00000014127  | 498.5516   | 5.1029  | 0.8118 | 6.2859  | 3.26E-10  | 1.00E-08  | 436.6241   | -2.7566 | 0.5202 | -5.2989 | 1.16E-07 | 1.95E-05 |
| ENSBTAG00000014090  | 301.1245   | 4.0289  | 0.7453 | 5.4058  | 6.45E-08  | 1.28E-06  | 280.2712   | -2.2248 | 0.4423 | -5.0295 | 4.92E-07 | 6.51E-05 |
| ENSBTAG00000000306  | 99.4737    | 5.5107  | 0.8869 | 6.2134  | 5.18E-10  | 1.51E-08  | 91.3153    | -2.1134 | 0.5363 | -3.9406 | 8.13E-05 | 4.86E-03 |
| ENSBTAG000000025405 | 54.9222    | 5.6817  | 0.9620 | 5.9059  | 3.51E-09  | 8.74E-08  | 51.5758    | -2.2157 | 0.4878 | -4.5427 | 5.55E-06 | 5.57E-04 |
| ENSBTAG000000024648 | 2202.0628  | 2.5443  | 0.4461 | 5.7035  | 1.17E-08  | 2.67E-07  | 2184.1692  | -1.5109 | 0.3252 | -4.6461 | 3.38E-06 | 3.68E-04 |
| ENSBTAG00000019665  | 13716.7991 | 10.2751 | 0.7304 | 14.0677 | 6.00E-45  | 4.49E-42  | 11630.9040 | -4.1733 | 0.5034 | -8.2897 | 1.14E-16 | 9.38E-14 |
| ENSBTAG000000024470 | 48.8652    | 4.8490  | 0.9601 | 5.0504  | 4.41E-07  | 7.38E-06  | 46.5805    | -1.9765 | 0.4999 | -3.9535 | 7.70E-05 | 4.64E-03 |
| ENSBTAG000000020034 | 739.0268   | 6.3440  | 0.6159 | 10.2995 | 7.08E-25  | 1.40E-22  | 696.0466   | -2.2602 | 0.4660 | -4.8502 | 1.23E-06 | 1.51E-04 |
| ENSBTAG00000006552  | 99.8226    | 5.6552  | 0.8550 | 6.6144  | 3.73E-11  | 1.34E-09  | 97.4345    | -1.9519 | 0.4670 | -4.1793 | 2.92E-05 | 2.18E-03 |
| ENSBTAG000000021672 | 96.6246    | 4.7017  | 0.9933 | 4.7334  | 2.21E-06  | 3.10E-05  | 87.2685    | -2.0875 | 0.5512 | -3.7869 | 1.53E-04 | 7.64E-03 |
| ENSBTAG000000009493 | 383.4560   | 3.8837  | 0.7443 | 5.2177  | 1.81E-07  | 3.35E-06  | 354.7421   | -2.2884 | 0.4295 | -5.3280 | 9.93E-08 | 1.72E-05 |
| ENSBTAG000000039160 | 162.5770   | 3.8234  | 0.9261 | 4.1285  | 3.65E-05  | 3.79E-04  | 145.5827   | -2.2170 | 0.5287 | -4.1937 | 2.74E-05 | 2.11E-03 |
| ENSBTAG00000011011  | 149.0978   | 4.6640  | 0.7564 | 6.1659  | 7.01E-10  | 1.99E-08  | 133.8720   | -2.5962 | 0.4748 | -5.4680 | 4.55E-08 | 8.95E-06 |
| ENSBTAG000000005628 | 262.1524   | 6.1583  | 0.7888 | 7.8075  | 5.83E-15  | 3.57E-13  | 245.6256   | -2.1067 | 0.5119 | -4.1156 | 3.86E-05 | 2.70E-03 |
| ENSBTAG000000001511 | 1516.7744  | 1.9343  | 0.4747 | 4.0746  | 4.61E-05  | 4.65E-04  | 1359.1914  | -1.7641 | 0.3578 | -4.9309 | 8.18E-07 | 1.03E-04 |
| ENSBTAG000000007530 | 74.5105    | 6.2911  | 0.8900 | 7.0691  | 1.56E-12  | 6.87E-11  | 78.0713    | -1.6398 | 0.4193 | -3.9109 | 9.20E-05 | 5.39E-03 |
| ENSBTAG000000007596 | 7645.0201  | 5.1053  | 0.3753 | 13.6039 | 3.79E-42  | 2.05E-39  | 8891.6855  | -1.1724 | 0.2840 | -4.1279 | 3.66E-05 | 2.59E-03 |
| ENSBTAG000000024928 | 602.3739   | 2.9281  | 0.6016 | 4.8668  | 1.13E-06  | 1.75E-05  | 544.8249   | -2.0197 | 0.4658 | -4.3355 | 1.45E-05 | 1.25E-03 |
| ENSBTAG000000011784 | 698.6093   | 4.8425  | 0.6847 | 7.0724  | 1.52E-12  | 6.73E-11  | 618.6797   | -2.6290 | 0.5054 | -5.2021 | 1.97E-07 | 3.04E-05 |
| ENSBTAG000000014113 | 82.9052    | 6.0174  | 0.9800 | 6.1401  | 8.25E-10  | 2.30E-08  | 70.2286    | -3.1230 | 0.5576 | -5.6012 | 2.13E-08 | 4.60E-06 |
| ENSBTAG000000034366 | 642.7311   | 4.8042  | 0.8060 | 5.9604  | 2.52E-09  | 6.49E-08  | 599.7981   | -2.0078 | 0.5201 | -3.8602 | 1.13E-04 | 6.26E-03 |
| ENSBTAG000000019716 | 2339.4418  | 10.4515 | 0.8099 | 12.9050 | 4.22E-38  | 1.72E-35  | 1971.8177  | -4.5815 | 0.5028 | -9.1122 | 8.07E-20 | 1.13E-16 |
| ENSBTAG000000011515 | 313.3737   | 7.2380  | 0.7774 | 9.3102  | 1.28E-20  | 1.64E-18  | 281.5105   | -2.6415 | 0.5058 | -5.2224 | 1.77E-07 | 2.82E-05 |
| ENSBTAG000000016163 | 66.1293    | 6.3396  | 1.0548 | 6.0103  | 1.85E-09  | 4.93E-08  | 58.0262    | -2.7483 | 0.5348 | -5.1392 | 2.76E-07 | 3.99E-05 |
| ENSBTAG000000020764 | 558.3394   | 2.4395  | 0.6001 | 4.0651  | 4.80E-05  | 4.81E-04  | 504.9261   | -1.8689 | 0.4401 | -4.2466 | 2.17E-05 | 1.73E-03 |
| ENSBTAG000000020676 | 27.3285    | 4.3083  | 1.1093 | 3.8836  | 1.03E-04  | 9.41E-04  | 22.7972    | -2.3797 | 0.5725 | -4.1568 | 3.23E-05 | 2.35E-03 |
| ENSBTAG000000014762 | 167.8739   | 5.5106  | 0.8616 | 6.3958  | 1.60E-10  | 5.22E-09  | 147.4314   | -2.5410 | 0.5438 | -4.6725 | 2.98E-06 | 3.34E-04 |
| ENSBTAG000000008636 | 1416.6220  | 3.8755  | 1.2145 | 3.1911  | 1.42E-03  | 8.59E-03  | 1383.1741  | -2.1068 | 0.4143 | -5.0858 | 3.66E-07 | 5.14E-05 |
| ENSBTAG000000008631 | 994.6071   | 4.8202  | 0.6748 | 7.1435  | 9.10E-13  | 4.13E-11  | 946.7466   | -1.9092 | 0.5062 | -3.7719 | 1.62E-04 | 7.95E-03 |
| ENSBTAG000000023283 | 112.1392   | 6.0171  | 0.9084 | 6.6239  | 3.50E-11  | 1.27E-09  | 99.6254    | -2.4885 | 0.5386 | -4.6201 | 3.84E-06 | 4.05E-04 |
| ENSBTAG000000002615 | 193.2870   | 3.1639  | 0.5056 | 6.2571  | 3.92E-10  | 1.18E-08  | 169.9228   | -2.5454 | 0.4047 | -6.2897 | 3.18E-10 | 1.02E-07 |
| ENSBTAG000000016424 | 145.9206   | 6.7050  | 0.9567 | 7.0088  | 2.40E-12  | 1.02E-10  | 124.4214   | -3.3761 | 0.5363 | -6.2952 | 3.07E-10 | 1.00E-07 |
| ENSBTAG000000021647 | 38.4542    | 5.1538  | 1.1442 | 4.5045  | 6.65E-06  | 8.38E-05  | 33.8871    | -2.1405 | 0.5680 | -3.7681 | 1.65E-04 | 8.05E-03 |
| ENSBTAG000000024503 | 836.2579   | 3.1378  | 0.7883 | 3.9806  | 6.88E-05  | 6.62E-04  | 834.6145   | -1.5929 | 0.4234 | -3.7623 | 1.68E-04 | 8.18E-03 |
| ENSBTAG000000007705 | 135.3153   | 2.6071  | 0.5731 | 4.5492  | 5.39E-06  | 6.92E-05  | 135.4888   | -1.4649 | 0.3600 | -4.0688 | 4.72E-05 | 3.14E-03 |
| ENSBTAG000000046158 | 894.0882   | 7.2365  | 0.6577 | 11.0028 | 3.71E-28  | 9.09E-26  | 849.2807   | -2.0788 | 0.4992 | -4.1645 | 3.12E-05 | 2.32E-03 |
| ENSBTAG000000011982 | 174.5282   | 6.7023  | 0.8733 | 7.6744  | 1.66E-14  | 9.41E-13  | 151.4779   | -3.4422 | 0.4759 | -7.2327 | 4.74E-13 | 2.66E-10 |
| ENSBTAG000000023338 | 10841.4875 | 5.0041  | 0.2256 | 22.1815 | 5.18E-109 | 6.99E-105 | 10783.5322 | -2.0445 | 0.2994 | -6.8293 | 8.54E-12 | 3.52E-09 |
| ENSBTAG000000010785 | 246.1412   | 1.6481  | 0.3398 | 4.8509  | 1.23E-06  | 1.86E-05  | 213.1850   | -1.8573 | 0.2704 | -6.8690 | 6.47E-12 | 2.75E-09 |
| ENSBTAG000000047379 | 104.1963   | 6.8126  | 1.0372 | 6.5682  | 5.09E-11  | 1.79E-09  | 90.9785    | -2.6217 | 0.5529 | -4.7420 | 2.12E-06 | 2.47E-04 |
| ENSBTAG000000020772 | 197.5829   | 3.0209  | 0.8625 | 3.5026  | 4.61E-04  | 3.40E-03  | 182.3079   | -1.8809 | 0.4968 | -3.7862 | 1.53E-04 | 7.64E-03 |
| ENSBTAG00000001009  | 381.7169   | 3.4333  | 0.8153 | 4.2110  | 2.54E-05  | 2.77E-04  | 331.1292   | -2.6969 | 0.4801 | -5.6171 | 1.94E-08 | 4.26E-06 |



|                    |           |         |        |         |          |          |           |         |        |         |          |          |
|--------------------|-----------|---------|--------|---------|----------|----------|-----------|---------|--------|---------|----------|----------|
| ENSBTAG0000006998  | 142.0297  | 3.5511  | 1.0625 | 3.3422  | 8.31E-04 | 5.60E-03 | 123.6625  | -2.1500 | 0.5622 | -3.8243 | 1.31E-04 | 6.79E-03 |
| ENSBTAG00000021717 | 295.7356  | 7.4516  | 0.6796 | 10.9648 | 5.64E-28 | 1.36E-25 | 339.4716  | -1.3455 | 0.2182 | -6.1670 | 6.96E-10 | 2.12E-07 |
| ENSBTAG00000007071 | 736.1500  | 1.8845  | 0.5498 | 3.4279  | 6.08E-04 | 4.32E-03 | 659.7378  | -1.7344 | 0.3659 | -4.7407 | 2.13E-06 | 2.47E-04 |
| ENSBTAG00000021435 | 1103.6723 | 4.5949  | 0.8180 | 5.6171  | 1.94E-08 | 4.22E-07 | 1119.2098 | -1.8584 | 0.3501 | -5.3083 | 1.11E-07 | 1.87E-05 |
| ENSBTAG00000003012 | 833.4196  | 2.3160  | 0.4506 | 5.1401  | 2.75E-07 | 4.85E-06 | 866.9810  | -1.2273 | 0.2667 | -4.6024 | 4.18E-06 | 4.34E-04 |
| ENSBTAG00000018011 | 96.1160   | 3.2113  | 0.7662 | 4.1913  | 2.77E-05 | 3.00E-04 | 83.8480   | -2.2300 | 0.5251 | -4.2466 | 2.17E-05 | 1.73E-03 |
| ENSBTAG00000008573 | 3183.0775 | 2.8894  | 0.5187 | 5.5699  | 2.55E-08 | 5.35E-07 | 2796.9823 | -2.4936 | 0.3676 | -6.7829 | 1.18E-11 | 4.72E-09 |
| ENSBTAG00000021523 | 7193.4909 | 2.5543  | 0.3675 | 6.9505  | 3.64E-12 | 1.50E-10 | 7618.2061 | -1.1888 | 0.3093 | -3.8436 | 1.21E-04 | 6.60E-03 |
| ENSBTAG00000005413 | 369.4671  | 5.7197  | 0.8321 | 6.8735  | 6.26E-12 | 2.54E-10 | 328.0298  | -2.7482 | 0.5027 | -5.4666 | 4.59E-08 | 8.95E-06 |
| ENSBTAG00000008497 | 52.2648   | 5.6190  | 1.1157 | 5.0363  | 4.75E-07 | 7.85E-06 | 45.0002   | -2.3943 | 0.5693 | -4.2059 | 2.60E-05 | 2.02E-03 |
| ENSBTAG00000013368 | 60.0560   | 4.0366  | 0.9453 | 4.2703  | 1.95E-05 | 2.19E-04 | 50.9387   | -2.4268 | 0.5659 | -4.2887 | 1.80E-05 | 1.52E-03 |
| ENSBTAG00000005018 | 105.2350  | 4.9667  | 0.8369 | 5.9348  | 2.94E-09 | 7.51E-08 | 93.2783   | -2.3839 | 0.5412 | -4.4053 | 1.06E-05 | 9.63E-04 |
| ENSBTAG00000014439 | 59.8535   | 5.7330  | 1.1121 | 5.1552  | 2.53E-07 | 4.54E-06 | 49.8320   | -3.0708 | 0.5709 | -5.3786 | 7.51E-08 | 1.35E-05 |
| ENSBTAG00000014555 | 167.1680  | 7.8684  | 0.9540 | 8.2476  | 1.62E-16 | 1.22E-14 | 140.1466  | -5.5119 | 0.4596 | 11.9919 | 3.92E-33 | 2.75E-29 |
| ENSBTAG00000013496 | 177.8908  | 2.8881  | 0.9020 | 3.2019  | 1.37E-03 | 8.38E-03 | 149.9198  | -2.3224 | 0.5479 | -4.2388 | 2.25E-05 | 1.77E-03 |
| ENSBTAG00000008959 | 115.7302  | 4.1530  | 0.6486 | 6.4032  | 1.52E-10 | 4.99E-09 | 104.5673  | -2.4446 | 0.4633 | -5.2767 | 1.32E-07 | 2.17E-05 |
| ENSBTAG00000016354 | 1117.6477 | 3.1754  | 0.5543 | 5.7283  | 1.01E-08 | 2.33E-07 | 1117.1802 | -1.6836 | 0.3256 | -5.1706 | 2.33E-07 | 3.52E-05 |
| ENSBTAG00000009768 | 428.0743  | 6.7269  | 0.6021 | 11.1717 | 5.61E-29 | 1.40E-26 | 368.8166  | -4.1086 | 0.3826 | 10.7401 | 6.60E-27 | 1.85E-23 |
| ENSBTAG00000007883 | 484.1313  | 5.5354  | 0.8188 | 6.7605  | 1.37E-11 | 5.31E-10 | 439.7353  | -2.8784 | 0.3985 | -7.2223 | 5.11E-13 | 2.76E-10 |
| ENSBTAG00000010349 | 704.8808  | 4.2818  | 0.5453 | 7.8520  | 4.09E-15 | 2.59E-13 | 604.2005  | -3.5274 | 0.3899 | -9.0472 | 1.47E-19 | 1.87E-16 |
| ENSBTAG00000001198 | 98.1866   | 6.8707  | 1.0257 | 6.6987  | 2.10E-11 | 7.86E-10 | 93.7670   | -2.0033 | 0.5093 | -3.9332 | 8.38E-05 | 4.97E-03 |
| ENSBTAG00000014560 | 40.9786   | 4.1742  | 0.9150 | 4.5619  | 5.07E-06 | 6.56E-05 | 36.6389   | -2.2691 | 0.5336 | -4.2526 | 2.11E-05 | 1.71E-03 |
| ENSBTAG00000024715 | 121.3413  | 3.0180  | 0.7827 | 3.8559  | 1.15E-04 | 1.04E-03 | 108.0569  | -2.0008 | 0.5210 | -3.8404 | 1.23E-04 | 6.66E-03 |
| ENSBTAG00000009214 | 309.4067  | 3.6443  | 0.7504 | 4.8566  | 1.19E-06 | 1.82E-05 | 269.7820  | -2.6846 | 0.4769 | -5.6291 | 1.81E-08 | 4.04E-06 |
| ENSBTAG00000039731 | 266.9642  | 2.7743  | 0.7717 | 3.5949  | 3.25E-04 | 2.52E-03 | 225.3526  | -2.5131 | 0.5043 | -4.9834 | 6.25E-07 | 8.12E-05 |
| ENSBTAG00000015592 | 818.7520  | 8.6058  | 0.9271 | 9.2821  | 1.66E-20 | 2.07E-18 | 688.0430  | -4.5932 | 0.5146 | -8.9263 | 4.41E-19 | 5.15E-16 |
| ENSBTAG00000020294 | 465.7080  | 2.9639  | 0.9382 | 3.1592  | 1.58E-03 | 9.40E-03 | 412.0946  | -1.9988 | 0.5386 | -3.7112 | 2.06E-04 | 9.62E-03 |
| ENSBTAG00000000816 | 1468.6712 | 3.9694  | 0.3952 | 10.0441 | 9.76E-24 | 1.85E-21 | 1539.3509 | -1.4710 | 0.3935 | -3.7380 | 1.86E-04 | 8.89E-03 |
| ENSBTAG00000024272 | 91.5317   | 4.7780  | 0.9511 | 5.0238  | 5.07E-07 | 8.32E-06 | 78.2784   | -2.4205 | 0.5678 | -4.2628 | 2.02E-05 | 1.65E-03 |
| ENSBTAG00000019633 | 113.9207  | 4.1412  | 0.6420 | 6.4504  | 1.12E-10 | 3.70E-09 | 398.7565  | 1.5897  | 0.3129 | 5.0808  | 3.76E-07 | 5.22E-05 |
| ENSBTAG00000023372 | 72.6267   | 4.1447  | 0.7948 | 5.2146  | 1.84E-07 | 3.39E-06 | 241.9832  | 1.5503  | 0.2459 | 6.3048  | 2.88E-10 | 9.64E-08 |
| ENSBTAG00000006902 | 22.4172   | 4.8543  | 1.1455 | 4.2376  | 2.26E-05 | 2.49E-04 | 198.4353  | 2.5489  | 0.4701 | 5.4222  | 5.89E-08 | 1.12E-05 |
| ENSBTAG00000038437 | 75.2286   | 6.1053  | 0.9395 | 6.4987  | 8.10E-11 | 2.75E-09 | 440.1741  | 1.9070  | 0.5026 | 3.7946  | 1.48E-04 | 7.44E-03 |
| ENSBTAG00000012931 | 2250.6450 | 3.8842  | 0.3403 | 11.4129 | 3.60E-30 | 9.72E-28 | 8093.6453 | 1.6388  | 0.3323 | 4.9320  | 8.14E-07 | 1.03E-04 |
| ENSBTAG00000021492 | 85.2751   | 6.4059  | 0.8989 | 7.1261  | 1.03E-12 | 4.64E-11 | 296.9165  | 1.4732  | 0.3684 | 3.9985  | 6.37E-05 | 4.00E-03 |
| ENSBTAG00000011460 | 439.0249  | 1.9905  | 0.4255 | 4.6786  | 2.89E-06 | 3.97E-05 | 1291.0142 | 1.4569  | 0.3522 | 4.1363  | 3.53E-05 | 2.54E-03 |
| ENSBTAG00000004617 | 349.5694  | -2.0715 | 0.4822 | -4.2960 | 1.74E-05 | 1.98E-04 | 91.4422   | -1.7030 | 0.4294 | -3.9659 | 7.31E-05 | 4.50E-03 |
| ENSBTAG00000004954 | 1615.9688 | -2.2934 | 0.3423 | -6.6998 | 2.09E-11 | 7.82E-10 | 1143.3732 | 1.3262  | 0.3018 | 4.3943  | 1.11E-05 | 1.00E-03 |
| ENSBTAG00000043985 | 512.7240  | -2.4106 | 0.4008 | -6.0149 | 1.80E-09 | 4.80E-08 | 285.4036  | 1.0394  | 0.2525 | 4.1170  | 3.84E-05 | 2.69E-03 |
| ENSBTAG00000006894 | 3926.8669 | -2.1926 | 0.6900 | -3.1779 | 1.48E-03 | 8.91E-03 | 3769.2844 | 1.8201  | 0.3596 | 5.0614  | 4.16E-07 | 5.73E-05 |
| ENSBTAG00000018181 | 3099.0358 | -1.7533 | 0.3017 | -5.8112 | 6.20E-09 | 1.47E-07 | 3003.3311 | 1.4535  | 0.1886 | 7.7059  | 1.30E-14 | 8.69E-12 |
| ENSBTAG00000009725 | 795.0144  | -5.1560 | 0.7154 | -7.2070 | 5.72E-13 | 2.71E-11 | 281.1559  | 2.2086  | 0.5581 | 3.9576  | 7.57E-05 | 4.62E-03 |
| ENSBTAG00000035654 | 115.0566  | -7.6406 | 0.7980 | -9.5744 | 1.02E-21 | 1.55E-19 | 61.2380   | 2.2632  | 0.5705 | 3.9670  | 7.28E-05 | 4.50E-03 |

**Supplementary Table 5:** KEGG Pathway analysis using DAVID to list 5 pathways that were significantly altered ( $P < 0.05$ ) between Vehicle + GnRH vs Vehicle and PD0325901 +GnRH vs Vehicle + GnRH

| Pathway ID                               | KEGG pathway name                      | No. of genes | P-value |
|------------------------------------------|----------------------------------------|--------------|---------|
| <b>Vehicle + GnRH vs Vehicle</b>         |                                        |              |         |
| 04630                                    | JAK-STAT signaling pathway             | 33           | 1.3E-4  |
| 04668                                    | TNF signaling pathway                  | 35           | 4.1E-9  |
| 04010                                    | MAPK signaling pathway                 | 45           | 1.3E-3  |
| 04370                                    | VEGF signaling pathway                 | 14           | 59.3E-3 |
| 01100                                    | Metabolic pathways                     | 156          | 2.9E-2  |
| <b>PD0325901 +GnRH vs Vehicle + GnRH</b> |                                        |              |         |
| 04668                                    | TNF signaling pathway                  | 17           | 1.4E-10 |
| 04060                                    | Cytokine-cytokine receptor interaction | 20           | 9.8E-8  |
| 04062                                    | Chemokine signaling pathway            | 16           | 2.0E-6  |
| 04010                                    | MAPK signaling pathway                 | 12           | 9.6E-3  |
| 04066                                    | HIF-1 signaling pathway                | 7            | 1.1E-2  |

**Supplementary Table 6:** Primers used in real-time PCR experiments

| <b>Gene*</b>                                                                                                                                                                                                                                                                                                                                                                                                                                                                                                                                                                                                                                                                                               | <b>Forward Primer</b>     | <b>Reverse Primer</b>     |
|------------------------------------------------------------------------------------------------------------------------------------------------------------------------------------------------------------------------------------------------------------------------------------------------------------------------------------------------------------------------------------------------------------------------------------------------------------------------------------------------------------------------------------------------------------------------------------------------------------------------------------------------------------------------------------------------------------|---------------------------|---------------------------|
| <b>Target Genes</b>                                                                                                                                                                                                                                                                                                                                                                                                                                                                                                                                                                                                                                                                                        |                           |                           |
| <i>ADAMTS1</i>                                                                                                                                                                                                                                                                                                                                                                                                                                                                                                                                                                                                                                                                                             | CTGGCAGAAACAGCACAACC      | TCCGCCATGCCAAGAGTATC      |
| <i>CYP17A1</i>                                                                                                                                                                                                                                                                                                                                                                                                                                                                                                                                                                                                                                                                                             | CCATCAGAGAAGTGCTCCGAAT    | GCCAATGCTGGAGTCAATGA      |
| <i>EGR1</i>                                                                                                                                                                                                                                                                                                                                                                                                                                                                                                                                                                                                                                                                                                | TCCCCTGTTCSAATGGTTT       | TGGGAGAAAAGGTGGTTGTC      |
| <i>FSHR</i>                                                                                                                                                                                                                                                                                                                                                                                                                                                                                                                                                                                                                                                                                                | AGCCCCTTGTCACAACCTCTATGTC | GTTCCCTCACCGTGAGGTAGATGT  |
| <i>LHR</i>                                                                                                                                                                                                                                                                                                                                                                                                                                                                                                                                                                                                                                                                                                 | GCACAGCAAGGAGACCAAATAA    | TTGGGTAAGCAGAAACCATAGTCA  |
| <i>PAPPA</i>                                                                                                                                                                                                                                                                                                                                                                                                                                                                                                                                                                                                                                                                                               | CAGAATGCACTGTTACCTGGA     | GCTGATCCCAATTCTCTTTCA     |
| <i>SCARB1</i>                                                                                                                                                                                                                                                                                                                                                                                                                                                                                                                                                                                                                                                                                              | ACATCCTGGTCTTGAGTGCG      | CCTTGAAGGGGAGCGAGTTT      |
| <i>SLC16A1</i>                                                                                                                                                                                                                                                                                                                                                                                                                                                                                                                                                                                                                                                                                             | TAAACTGCTGTGGTGGCTGGA     | ACTTGCCCCCTTTTTTCGTCT     |
| <i>STAR</i>                                                                                                                                                                                                                                                                                                                                                                                                                                                                                                                                                                                                                                                                                                | GAGATGGCTGGAAGAAGGTG      | GCCAGATAACCCCATCTCAA      |
| <i>STAT3</i>                                                                                                                                                                                                                                                                                                                                                                                                                                                                                                                                                                                                                                                                                               | CTGCAGCAGAAGGTTAGCTACAAA  | TTCTAAACAGCTCCACGATTCTCTC |
| <i>TIMP1</i>                                                                                                                                                                                                                                                                                                                                                                                                                                                                                                                                                                                                                                                                                               | GACATCCGGTTCATCTACACC     | ACCAGCAGCATAGGTCTTGG      |
| <i>TNFAIP6</i>                                                                                                                                                                                                                                                                                                                                                                                                                                                                                                                                                                                                                                                                                             | GCTCACGGATGGGGATTCAA      | CGTGCTTCCCTGTGGTAGAC      |
| <b>Reference Genes</b>                                                                                                                                                                                                                                                                                                                                                                                                                                                                                                                                                                                                                                                                                     |                           |                           |
| <i>ACTINB</i>                                                                                                                                                                                                                                                                                                                                                                                                                                                                                                                                                                                                                                                                                              | TGTGGATCAGCAAGCAGGAGTA    | TGCGCAAGTTAGGTTTTGTCA     |
| <i>CYCLOPHILIN</i>                                                                                                                                                                                                                                                                                                                                                                                                                                                                                                                                                                                                                                                                                         | GGTCATCGGTCTCTTTGGAA      | TCCTTGATCACACGATGGAA      |
| <i>L19</i>                                                                                                                                                                                                                                                                                                                                                                                                                                                                                                                                                                                                                                                                                                 | GCCAACTCCCGTCAGCAGA       | TGGCTGTACCCTTCCGCTT       |
| <p>*<i>ADAMTS1</i>: a disintegrin and metalloproteinase with thrombospondin motif 1 ; <i>CYP17A1</i>:cytochrome P450 family 17 subfamily A member 1; <i>EGR1</i>: early growth response 1; <i>FSHR</i>: follicle-stimulating hormone receptor ; <i>LHR</i>: luteinizing hormone receptor ; <i>PAPPA</i>: pregnancy-associated plasma protein A ; <i>SCARB1</i>: scavenger receptor class B member 1; <i>SLC16A1</i>: monocarboxylate transporter 1; <i>STAR</i>: steroidogenic acute regulatory protein; <i>STAT3</i>: signal transducer and activator of transcription 3; <i>TIMP1</i>: tissue inhibitor of matrix metalloproteinases 1; <i>TNFAIP6</i>:tumor necrosis factor alpha induced protein 6</p> |                           |                           |

**Supplementary Figure 2:** Protein extracts used for immunoblots were obtained from granulosa cells aspirated from an individual ovulating follicle in each cow. Given the limited amount of protein obtained, we cut the membranes to probe for the proteins of different sizes.

**A. Uncropped immunoblots used in Figure 2**

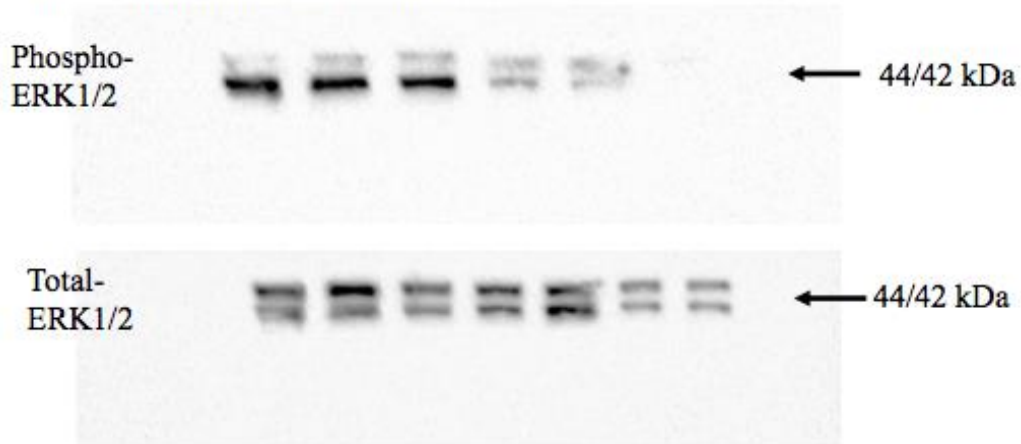

**B. Uncropped immunoblots used in Figure 9B**

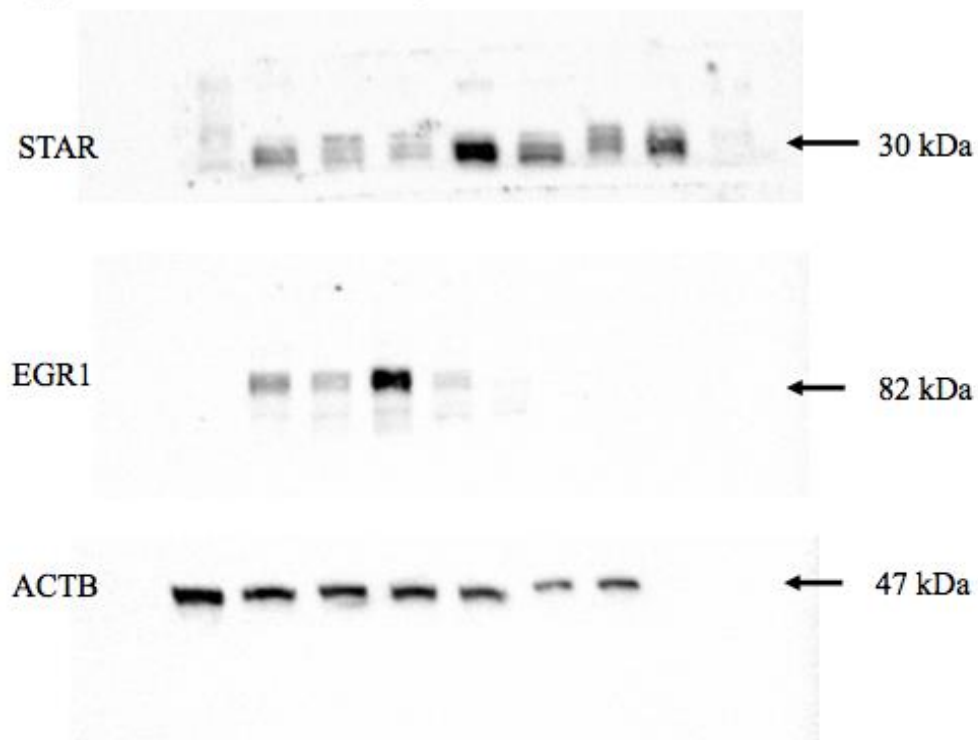

**Supplementary Table 7: Antibodies used for immunoblot analyses**

| Antibody                                             | Concentration | Expected Antibody Size | Manufacturer           | References |
|------------------------------------------------------|---------------|------------------------|------------------------|------------|
| ACTINB                                               | 1:1000        | 47 kDa                 | Abcam (ab8227)         | 1-4        |
| EGR1                                                 | 1:1000        | 82 kDa                 | Santa Cruz (sc-189)    | 3,4        |
| Phospho-p44/42 MAPK (Phospho-ERK1/2) (Thr202/Tyr204) | 1:1000        | 44 and 42 kDa          | Cell Signaling (#4376) | 1-4        |
| P44/42 MAPK (Total-ERK1/2)                           | 1:1000        | 44 and 42 kDa          | Cell Signaling (#4695) | 1-4        |
| STAR                                                 | 1:750         | 30 kDa                 | Santa Cruz (sc-25806)  | 3,5,6      |
| Goat pAb to Rb IgG                                   | 1:10 000      |                        | Abcam (ab6721)         | 3,4        |

#### REFERENCES

- 1 Ilha, G. F. *et al.* Lack of FSH support enhances LIF–STAT3 signaling in granulosa cells of atretic follicles in cattle. *Reproduction (Cambridge, England)* **150**, 395-403 (2015).
- 2 Gasperin, B. G. *et al.* Functional status of STAT3 and MAPK3/1 signaling pathways in granulosa cells during bovine follicular deviation. *Theriogenology* **83**, 353-359 (2015).
- 3 da Rosa, P. *et al.* Mechanistic target of rapamycin is activated in bovine granulosa cells after LH surge but is not essential for ovulation. *Reproduction in domestic animals = Zuchthygiene* **51**, 766-773, doi:10.1111/rda.12745 (2016).
- 4 da Rosa, P. R. A. *et al.* Reversible meiotic arrest of bovine oocytes by EGFR inhibition and follicular hemisections. *Theriogenology* **99**, 53-62, doi:10.1016/j.theriogenology.2017.05.014 (2017).
- 5 Woclawek-Potocka, I. *et al.* Effects of lysophosphatidic acid on tumor necrosis factor alpha and interferon gamma action in the bovine corpus luteum. *Molecular and cellular endocrinology* **377**, 103-111, doi:10.1016/j.mce.2013.07.005 (2013).
- 6 Kowalczyk-Zieba, I. *et al.* Lysophosphatidic acid action in the bovine corpus luteum -an in vitro study. *J Reprod Dev* **58**, 661-671 (2012).
